# Supplementary material for: Is there an imbalance in the supply and demand for universal accessibility knowledge? Twenty years of UAIS papers viewed through the lens of WCAG
Source: Springer Nature journal article supplement (doi:10.1007/s10209-021-00834-y), 2021-08-14
Supplement: MOESM6 [file 19571536]

## Sheet: 6 assistive technology
Title:	Is there an imbalance in the supply and demand for universal accessibility knowledge? A bibliometric study of 20 years of UAIS papers through the lens of WCAG
Journal:	Universal Access in the Information Society
Author:	Frode Eika Sandnes
Email:	frodes@oslomet.no
Description:	Assistive Technology publication data retreived from Scopus on December 19, 2020
Authors	Title	Year	Source title	Cited by	Link	Affiliations	Authors with affiliations	Abstract	Author Keywords	Index Keywords	Document Type	Source
Capati V., Covert S.Y., Paleg G.	Stander Use for an Adolescent with Cerebral Palsy at GMFCS Level with Hip and Knee Contractures	2020	Assistive Technology	1	https://www.scopus.com/inward/record.uri?eid=2-s2.0-85063904975&doi=10.1080%2f10400435.2019.1579268&partnerID=40&md5=ff560870dbbe2f310dab38223ea65e62	Los Angeles County Department of Public Health, California Children’s Services, Children’s Medical Services, El Monte, CA, United States; Montgomery County Infants and Toddlers Program, Rockville, MD, United States	Capati, V., Los Angeles County Department of Public Health, California Children’s Services, Children’s Medical Services, El Monte, CA, United States; Covert, S.Y., Los Angeles County Department of Public Health, California Children’s Services, Children’s Medical Services, El Monte, CA, United States; Paleg, G., Montgomery County Infants and Toddlers Program, Rockville, MD, United States	Aims: Adolescents with cerebral palsy (CP) report high rates of pain and contractures. Standing may positively affect these outcomes, yet there are no published studies on how to accommodate contractures or when a stander is no longer beneficial. This is the first study that answers the question: Can an adolescent with CP and 40-degree knee and/or hip flexion contractures benefit from a standing …	adolescents; cerebral palsy; lower extremity; range of motion; stander	Diseases; adolescents; Cerebral palsy; Lower extremity; Range of motions; stander; Physiological models	Article	Scopus
Mize M., Bryant D.P., Bryant B.R.	Teaching reading to students with learning disabilities: Effects of combined iPad-assisted and peer-assisted instruction on oral reading fluency performance	2020	Assistive Technology	1	https://www.scopus.com/inward/record.uri?eid=2-s2.0-85060081968&doi=10.1080%2f10400435.2018.1559896&partnerID=40&md5=27e825da0fec13d6cdb1c288a5e6008f	Department of Curriculum and Pedagogy, Richard W. Riley College of Education, Winthrop University, Rock Hill, SC, United States; The Meadows Center for Preventing Educational Risk, College of Education, The University of Texas at Austin, Austin, TX, United States; The Meadows Center for Preventing Educational Risk, Department of Special Education, The University of Texas at Austin, Austin, TX, Un…	Mize, M., Department of Curriculum and Pedagogy, Richard W. Riley College of Education, Winthrop University, Rock Hill, SC, United States; Bryant, D.P., The Meadows Center for Preventing Educational Risk, College of Education, The University of Texas at Austin, Austin, TX, United States; Bryant, B.R., The Meadows Center for Preventing Educational Risk, Department of Special Education, The Univers…	Students with reading learning disabilities (RLDs) often face struggles in acquiring basic reading abilities, including oral reading fluency. The current study builds on previous work that compared peer-assisted instruction (PAI) to iPad-assisted instruction (IAI) on oral reading fluency, which led to the conclusion that a combined approach may be more effective than either approach alone. A mult…	iPad; learning disabilities; Oral reading fluency	Hand held computers; Baseline design; iPad; Learning disabilities; Oral reading fluencies; Peer-assisted; Reading abilities; Students	Article	Scopus
McCarthy J.W., DiGiovanni J.J., Ries D.T., Boster J.B., Riffle T.L.	Exploration of Head Related Transfer Function and Environmental Sounds as a Means to Improve Auditory Scanning for Children Requiring Augmentative and Alternative Communication	2020	Assistive Technology		https://www.scopus.com/inward/record.uri?eid=2-s2.0-85059879487&doi=10.1080%2f10400435.2018.1559897&partnerID=40&md5=ca6b4b7a16e09d6a23473522d9fa4e9f	Communication Sciences and Disorders, Ohio University, Athens, OH, United States; Communication Sciences and Disorders, University of Cincinnati, Cincinnati, OH, United States	McCarthy, J.W., Communication Sciences and Disorders, Ohio University, Athens, OH, United States; DiGiovanni, J.J., Communication Sciences and Disorders, University of Cincinnati, Cincinnati, OH, United States; Ries, D.T.; Boster, J.B., Communication Sciences and Disorders, Ohio University, Athens, OH, United States; Riffle, T.L., Communication Sciences and Disorders, Ohio University, Athens, OH,…	Many individuals who require augmentative and alternative communication (AAC) cannot directly select items on computer-based displays. Individuals who also have visual impairments may need to rely on sequential announcement of array choices in auditory scanning. The method is challenging and there is a lack of research to improve this access method. Two potential solutions were tested: using envi…	augmentative and alternative communication; computer access; pediatrics; usability; visual impairment	Clocks; Pediatrics; Augmentative-and-alternative communication; Computer access; Environmental sounds; Head related transfer function; Spatial informations; Spectral feature; usability; Visual impairment; Human rehabilitation engineering	Article	Scopus
Arlati S., Colombo V., Ferrigno G., Sacchetti R., Sacco M.	Virtual reality-based wheelchair simulators: A scoping review	2020	Assistive Technology	1	https://www.scopus.com/inward/record.uri?eid=2-s2.0-85059767738&doi=10.1080%2f10400435.2018.1553079&partnerID=40&md5=6829538c5cf1254f142965233a205479	Istituto di Sistemi e Tecnologie Industriali Intelligenti per il Manifatturiero Avanzato (STIIMA), Consiglio Nazionale delle Ricerche (CNR), Lecco, Italy; Dipartimento di Elettronica, Informazione e Bioingengeria (DEIB), Politecnico di Milano, Milano, Italy; Centro Protesi Vigorso di Budrio, Istituto Nazionale Assicurazione Infortuni sul Lavoro (INAIL), Budrio (Bologna), Italy	Arlati, S., Istituto di Sistemi e Tecnologie Industriali Intelligenti per il Manifatturiero Avanzato (STIIMA), Consiglio Nazionale delle Ricerche (CNR), Lecco, Italy, Dipartimento di Elettronica, Informazione e Bioingengeria (DEIB), Politecnico di Milano, Milano, Italy; Colombo, V., Istituto di Sistemi e Tecnologie Industriali Intelligenti per il Manifatturiero Avanzato (STIIMA), Consiglio Nazion…	Sense of presence (SoP) has recently emerged as one of the key elements promoting the effectiveness of virtual reality-based training programs. In the context of wheelchair simulators (WSs), the effectiveness of the simulation has been sought using different perception and interaction devices, providing the end-users with different levels of SoP. We performed a scoping review searching scientific…	interaction; perception; sense of presence; Virtual reality; wheelchair simulator	Clinical research; Sensory perception; Simulators; Wheelchairs; Clinical practices; High heterogeneity; interaction; Interaction devices; Optimal solutions; Sense of presences; Technological solution; Training program; Virtual reality	Review	Scopus
Heyman N.	Identifying features of apps to support using evidence-based language intervention with children	2020	Assistive Technology		https://www.scopus.com/inward/record.uri?eid=2-s2.0-85059033053&doi=10.1080%2f10400435.2018.1553078&partnerID=40&md5=d3dd6308a9c3ac08467660b1dca89e62	Faculty of Humanities, Department of Speech Pathology and Audiology, University of the Witwatersrand, Johannesburg, South Africa	Heyman, N., Faculty of Humanities, Department of Speech Pathology and Audiology, University of the Witwatersrand, Johannesburg, South Africa	This study investigated the features of apps that speech–language pathologists (SLPs) deem to be beneficial for language intervention with children. The study employed an explanatory, sequential mixed-method approach. A self-developed online survey was distributed to SLPs (n = 338) who use apps. This was followed by a semi-structured interview with some participants (n = 16) in order to obtain fu…	app features; Apps; evidence-based practice; iPad; language intervention; speech–language pathology	Application programs; Occupational therapy; Surveys; Active ingredients; Evidence-based practices; Feature matching; iPad; language intervention; Multi-media learning; Semi structured interviews; Underlying principles; E-learning	Article	Scopus
Shirogane S., Toyama S., Takashima A., Tanaka T.	The relationship between torso inclination and the shearing force of the buttocks while seated in a wheelchair: Preliminary research in non-disabled individuals	2020	Assistive Technology		https://www.scopus.com/inward/record.uri?eid=2-s2.0-85057592185&doi=10.1080%2f10400435.2018.1547333&partnerID=40&md5=34ebcc2cfd0ce71035bde9b2204469f6	Department of Assistive Technology, Research Institute, National Rehabilitation Center for Persons with Disabilities, Tokorozawa, Japan; Department of Rehabilitation Engineering, Research Institute, National Rehabilitation Center for Persons with Disabilities, Tokorozawa, Japan; Deptartment of Physical Therapy, Sapporo, Hokkaido University of Science, Sapporo, Japan; Institute of Gerontology, The…	Shirogane, S., Department of Assistive Technology, Research Institute, National Rehabilitation Center for Persons with Disabilities, Tokorozawa, Japan; Toyama, S., Department of Rehabilitation Engineering, Research Institute, National Rehabilitation Center for Persons with Disabilities, Tokorozawa, Japan; Takashima, A., Department of Assistive Technology, Research Institute, National Rehabilitati…	The shearing force acting upon the contacting surface of the buttocks while seated in a wheelchair has been linked to the development of pressure ulcers. However, the actual causative factors have not been examined in detail. In an attempt to clarify the nature of this problem, we developed a specific measurement system. In preparation for future clinical applications, we conducted preliminary te…	assessment; instrumentation; positioning and support surfaces; seating	Wheelchairs; assessment; Clinical application; Contacting surfaces; Disabled individuals; instrumentation; Measurement methods; seating; Support surfaces; Shearing	Article	Scopus
O’Neill S.J., Smyth S., Smeaton A., O’Connor N.E.	Assistive technology: Understanding the needs and experiences of individuals with autism spectrum disorder and/or intellectual disability in Ireland and the UK	2020	Assistive Technology	4	https://www.scopus.com/inward/record.uri?eid=2-s2.0-85060620201&doi=10.1080%2f10400435.2018.1535526&partnerID=40&md5=e552dd527e5907dde70647000f3e921f	School of Nursing and Human Sciences, Dublin City University, Dublin, Ireland; Insight Centre for Data Analytics, Dublin City University, Dublin, Ireland	O’Neill, S.J., School of Nursing and Human Sciences, Dublin City University, Dublin, Ireland; Smyth, S., School of Nursing and Human Sciences, Dublin City University, Dublin, Ireland; Smeaton, A., Insight Centre for Data Analytics, Dublin City University, Dublin, Ireland; O’Connor, N.E., Insight Centre for Data Analytics, Dublin City University, Dublin, Ireland	Assistive technologies (ATs) aimed at improving the life quality of persons with Autism Spectrum Disorder and/or Intellectual Disability (ASD/ID) is an important research area. Few have examined how this population use and experience AT or their vision for future uses of AT. The present study aimed to update and extend previous research and provides insight from caregivers, and other stakeholders…	Assistive Technology (AT); Autism Spectrum Disorder (ASD); Intellectual Disability (ID); self-management; smartphone; tablet	Scheduling; Assistive technology; Autism spectrum disorders; Intellectual disability; Self management; tablet; Diseases	Article	Scopus
Lung C.-W., Yang T.D., Liau B.-Y., Cheung W.C., Jain S., Jan Y.-K.	Dynamic changes in seating pressure gradient in wheelchair users with spinal cord injury	2020	Assistive Technology	1	https://www.scopus.com/inward/record.uri?eid=2-s2.0-85060155294&doi=10.1080%2f10400435.2018.1546781&partnerID=40&md5=94868882921d05e30a2a99822949bf40	Rehabilitation Engineering Lab, Department of Kinesiology and Community Health, University of Illinois at Urbana-Champaign, Champaign, IL, United States; Department of Creative Product Design, Asia University, Taichung, Taiwan; Department of Biomedical Engineering, Hung Kuang University, Taichung, Taiwan; Department of Special Education, University of Illinois at Urbana-Champaign, Champaign, IL, …	Lung, C.-W., Rehabilitation Engineering Lab, Department of Kinesiology and Community Health, University of Illinois at Urbana-Champaign, Champaign, IL, United States, Department of Creative Product Design, Asia University, Taichung, Taiwan; Yang, T.D., Rehabilitation Engineering Lab, Department of Kinesiology and Community Health, University of Illinois at Urbana-Champaign, Champaign, IL, United …	Pressure ulcer interventions are commonly assessed with measures of seating interface pressure, such as peak pressure gradients (PPGs). Decreases in PPG magnitudes may reduce pressure ulcer risk by decreasing tissue deformation and increasing tissue perfusion of at-risk weight-bearing tissues. Changes in PPG directions, which have previously been overlooked in the seating pressure literature, may…	peak pressure gradient; pressure ulcers; recline; seating pressures; spinal cord injury; tilt; wheelchair	Diseases; Histology; Patient rehabilitation; Pressure gradient; Wheelchairs; Interface pressure; Ischial tuberosity; Pressure ulcers; recline; Spinal cord injuries (SCI); tilt; Tissue deformations; Wheelchair tilt and recline; Tissue	Article	Scopus
Veis Karami M., Aboutorabi A., Ebrahimzadeh K., Arazpour M., Asare E.	The effect of orthotic interventions on balance performance in adolescent idiopathic scoliosis: A systematic literature review	2020	Assistive Technology		https://www.scopus.com/inward/record.uri?eid=2-s2.0-85059693783&doi=10.1080%2f10400435.2018.1539419&partnerID=40&md5=2f70c1f4b71597f1c0cbbff54c3ae89b	Department of Orthotics and Prosthetics, University of Social Welfare and Rehabilitation Sciences, Tehran, Iran; Skull Base Research Center, Loghman Hakim Hospital, Tehran, Iran; Department of Neurosurgery, Loghman Hakim Hospital, Shahid Beheshti University of Medical Sciences, Tehran, Iran; Pediatric Neurorehabilitation Research Center, University of Social Welfare and Rehabilitation Sciences, T…	Veis Karami, M., Department of Orthotics and Prosthetics, University of Social Welfare and Rehabilitation Sciences, Tehran, Iran; Aboutorabi, A., Department of Orthotics and Prosthetics, University of Social Welfare and Rehabilitation Sciences, Tehran, Iran; Ebrahimzadeh, K., Skull Base Research Center, Loghman Hakim Hospital, Tehran, Iran, Department of Neurosurgery, Loghman Hakim Hospital, Shah…	Background: Spinal bracing is one form of conservative treatment used in the treatment of adolescent idiopathic scoliosis (AIS). Aim: The aim of this review was therefore to evaluate the effect of brace treatment on balance in subjects with AIS. Method: The search strategy was based on the Population Intervention Comparison Outcome (PICO). PubMed, Scopus, ISI web of knowledge, Ovid, the Cochrane …	balance; brace; orthoses; postural stability; postural stabilization; posturography; scoliosis; systematic review	Balancing; Stabilization; Wear of materials; brace; Orthoses; Postural stability; Posturography; scoliosis; Systematic Review; Orthotics	Review	Scopus
Wurdeman S.R., Stevens P.M., Campbell J.H.	Mobility analysis of amputees (MAAT 3): Matching individuals based on comorbid health reveals improved function for above-knee prosthesis users with microprocessor knee technology	2020	Assistive Technology		https://www.scopus.com/inward/record.uri?eid=2-s2.0-85059480842&doi=10.1080%2f10400435.2018.1530701&partnerID=40&md5=2e92780da3b803921ec3fbcdb5cfbe49	Department of Clinical and Scientific Affairs, Hanger Clinic, Austin, TX, United States; Department of Biomechanics, University of Nebraska at Omaha, Omaha, NE, United States; School of Medicine, University of Utah, Salt Lake City, UT, United States	Wurdeman, S.R., Department of Clinical and Scientific Affairs, Hanger Clinic, Austin, TX, United States, Department of Biomechanics, University of Nebraska at Omaha, Omaha, NE, United States; Stevens, P.M., Department of Clinical and Scientific Affairs, Hanger Clinic, Austin, TX, United States, School of Medicine, University of Utah, Salt Lake City, UT, United States; Campbell, J.H., Department o…	The objective of this cross-sectional observational study was to determine whether the use of a microprocessor knee for individuals with an above-the-knee amputation results in improved functional mobility compared to their peers of matched comorbid-health with a non-microprocessor knee, and to inform how this compares to the mobility observed in below-knee prosthesis users. A sample of 450 indiv…	amputation; mobility; MPK; outcomes; prosthetics	Artificial limbs; Carrier mobility; Health; Prosthetics; Above-knee prosthesis; amputation; Below-knee prosthesis; Functional mobility; Lower-limb amputations; Mobility analysis; Observational study; outcomes; Knee prostheses	Article	Scopus
García-Crespo A., Montes-Chunga M., Matheus-Chacin C.A., Garcia-Encabo I.	Increasing the autonomy of deafblind individuals through direct access to content broadcasted on digital terrestrial television	2020	Assistive Technology	1	https://www.scopus.com/inward/record.uri?eid=2-s2.0-85059313131&doi=10.1080%2f10400435.2018.1543219&partnerID=40&md5=3f693a483a8ece608f2d71876f1f8896	Department of Computer Science, Universidad Carlos III de Madrid, Leganés, Spain	García-Crespo, A., Department of Computer Science, Universidad Carlos III de Madrid, Leganés, Spain; Montes-Chunga, M., Department of Computer Science, Universidad Carlos III de Madrid, Leganés, Spain; Matheus-Chacin, C.A., Department of Computer Science, Universidad Carlos III de Madrid, Leganés, Spain; Garcia-Encabo, I., Department of Computer Science, Universidad Carlos III de Madrid, Leganés,…	Digital terrestrial television currently incorporates accessibility elements for the deaf (closed captions, CCs) and for the blind (audio description and audio navigation), however the deafblind population has particular accessibility needs that to date have not been met. This work presents a technical aid (a mobile application called GoAll) developed to increase the autonomy of deafblind individ…	Audio and visual impaired; deafblind; digital TV accessibility	Digital television; Display devices; Television broadcasting; Application Servers; Audio and visual impaired; Audio description; Deafblind; Digital terrestrial television; Digital TV; Mobile applications; Technical assistance; Surveys	Article	Scopus
Lauriks S., MSc, Meiland F., PhD, Osté J.P., MSc, Hertogh C., PhD, Dröes R.-M., PhD	Effects of Assistive Home Technology on quality of life and falls of people with dementia and job satisfaction of caregivers: Results from a pilot randomized controlled trial	2020	Assistive Technology		https://www.scopus.com/inward/record.uri?eid=2-s2.0-85059302582&doi=10.1080%2f10400435.2018.1531952&partnerID=40&md5=62bfbbbb43ec174ac5df5ab5e4cad6ca	Amsterdam Public Health Service (GGD Amsterdam), Department of Epidemiology, Health promotion and Care innovation, Amsterdam, Netherlands; Amsterdam University Medical Centers, location VUmc, Department of Psychiatry, Amsterdam Public Health Research Institute, Amsterdam, Netherlands; Amsterdam University Medical Centers, location VUmc, Department of General Practice and Elderly Care Medicine, Am…	Lauriks, S., MSc, Amsterdam Public Health Service (GGD Amsterdam), Department of Epidemiology, Health promotion and Care innovation, Amsterdam, Netherlands; Meiland, F., PhD, Amsterdam University Medical Centers, location VUmc, Department of Psychiatry, Amsterdam Public Health Research Institute, Amsterdam, Netherlands; Osté, J.P., MSc, Amsterdam Public Health Service (GGD Amsterdam), Department …	Objectives: Determine the effects of the implementation of Assistive Home Technology (AHT) in group homes on the quality of life (QoL) of people with dementia and on job satisfaction of caregivers. Method: Pilot randomized controlled trial in nine in-patient care group homes (group homes with vs. without AHT). Participants were 54 people with dementia and 25 professionals. Outcome measurements we…	Assistive Home Technology; dementia; dementia care; falls; job satisfaction; quality of life	Job satisfaction; Neurodegenerative diseases; Assistive; dementia; Dementia cares; falls; Quality of life; Quality control	Article	Scopus
Marszałek J., PhD, PT, Kosmol A., PhD, Mróz A., PhD, Wiszomirska I., PhD, PT, Fiok K., PhD, Molik B., PhD, PT	Physiological parameters depending on two different types of manual wheelchair propulsion	2020	Assistive Technology	2	https://www.scopus.com/inward/record.uri?eid=2-s2.0-85055197960&doi=10.1080%2f10400435.2018.1529005&partnerID=40&md5=49fc22796172535a60fbe05d45eaeb49	Jozef Pilsudski University of Physical Education in Warsaw, Poland; Physical Education, Jozef Pilsudski University of Physical Education in Warsaw, Poland; Warsaw University of Technology, Poland	Marszałek, J., PhD, PT, Jozef Pilsudski University of Physical Education in Warsaw, Poland; Kosmol, A., PhD, Jozef Pilsudski University of Physical Education in Warsaw, Poland; Mróz, A., PhD, Physical Education, Jozef Pilsudski University of Physical Education in Warsaw, Poland; Wiszomirska, I., PhD, PT, Jozef Pilsudski University of Physical Education in Warsaw, Poland; Fiok, K., PhD, Warsaw Uni…	Objective. The purpose of this study was to compare aerobic parameters in the multistage field test (MFT) in hand rim wheelchair propulsion and lever wheelchair propulsion. Methods. Twenty-one men performed MFT using two different types of propulsion, i.e., lever and hand rim wheelchair propulsion. The covered distance and physiological variables (oxygen uptake (VO2), minute ventilation (VE), car…	activities of daily living; ergonomics and anthropometry; mobility; wheelchair transportation; wheeled mobility aids	Carbon dioxide; Carrier mobility; Computational complexity; Ergonomics; Physiological models; Physiology; Testing; Vanadium dioxide; Wheelchairs; Activities of Daily Living; Manual wheelchair propulsions; Minute ventilations; Physiological parameters; Statistical significance; Wheelchair propulsion; Wheelchair transportation; Wheeled mobility; Propulsion	Article	Scopus
Schoon Y., Bongers K.T.J., Olde Rikkert M.G.M.	Feasibility study by a single-blind randomized controlled trial of self-management of mobility with a gait-speed feedback device by older persons at risk for falling	2020	Assistive Technology		https://www.scopus.com/inward/record.uri?eid=2-s2.0-85087592417&doi=10.1080%2f10400435.2018.1529004&partnerID=40&md5=3f43d29c36b5f0664e47e164625cae0c	Department of Geriatric Medicine (925), Radboud University Medical Center, Nijmegen, Netherlands	Schoon, Y., Department of Geriatric Medicine (925), Radboud University Medical Center, Nijmegen, Netherlands; Bongers, K.T.J., Department of Geriatric Medicine (925), Radboud University Medical Center, Nijmegen, Netherlands; Olde Rikkert, M.G.M., Department of Geriatric Medicine (925), Radboud University Medical Center, Nijmegen, Netherlands	This single-blind randomized pilot study explored feasibility and safety of a self-management fall prevention program, hypothesizing that older persons can comply with this program, while it does not result in more (injurious) falls, or a decrease in mental wellbeing as an adverse effect of being focused on falls prevention. Eighty-six persons, community-dwelling or home for the aged (mean age 80…	community-dwelling older persons; falls; home for the aged; prevention; telemonitoring	Drops; Feedback; Housing; Control groups; Fall prevention; Feasibility studies; Feedback device; Health perceptions; Home for the aged; Randomized controlled trial; Self management; Accident prevention; aged; article; community dwelling person; controlled study; drug safety; feasibility study; female; follow up; home for the aged; human; human experiment; incidence; major clinical study; percepti…	Article	Scopus
Dyer B.	Development of high performance parasport prosthetic limbs: A proposed framework and case study	2020	Assistive Technology		https://www.scopus.com/inward/record.uri?eid=2-s2.0-85087589339&doi=10.1080%2f10400435.2018.1527795&partnerID=40&md5=5937d73ec9b70a746defb64f76eac432	Faculty of Science & Technology, Bournemouth University, Bournemouth, United Kingdom	Dyer, B., Faculty of Science & Technology, Bournemouth University, Bournemouth, United Kingdom	Sport with a disability has progressed from undertaking physical activity for recreation to one of a high performance environment at competitions such as the Paralympic Games. There is currently limited information and guidance to help inform stakeholders as to how to develop the high performance technology of elite athletes who possess limb absence. In this manuscript, a conceptual framework for…	amputation; prostheses design; sport	Product design; Sports; Case-studies; Conceptual frameworks; Elite athlete; High-performance technologies; Limited information; Physical activity; Prosthetic limbs; Technological performance; Artificial limbs	Article	Scopus
Palmqvist L., Danielsson H.	Parents act as intermediary users for their children when using assistive technology for cognition in everyday planning: Results from a parental survey	2020	Assistive Technology	2	https://www.scopus.com/inward/record.uri?eid=2-s2.0-85060598388&doi=10.1080%2f10400435.2018.1522523&partnerID=40&md5=fecd813e6707cf99e0db9498c5f93243	Department of Behavioural Sciences and Learning, Linköping University, Linköping, Sweden; Swedish Institute for Disability Research, Linköping, Sweden	Palmqvist, L., Department of Behavioural Sciences and Learning, Linköping University, Linköping, Sweden, Swedish Institute for Disability Research, Linköping, Sweden; Danielsson, H., Department of Behavioural Sciences and Learning, Linköping University, Linköping, Sweden, Swedish Institute for Disability Research, Linköping, Sweden	Assistive Technology for Cognition (ATC) is employed by children with and without disabilities. However, how the ATC is used in everyday life has not been studied. The current study investigated ATC-usage in everyday planning in three groups: 1) children qualifying for Swedish habilitation centers (ID/ASD), 2) children with disability not qualifying for habilitation service (ADHD), and 3) childre…	Activities of daily living; assessment; cognitive impairment; developmental disability; electronic aids to daily living; usability	Human rehabilitation equipment; Activities of Daily Living; assessment; Cognitive impairment; Developmental disability; Electronic aids to daily livings; usability; Surveys	Article	Scopus
Hermawati S., Pieri K.	Assistive technologies for severe and profound hearing loss: Beyond hearing aids and implants	2020	Assistive Technology	3	https://www.scopus.com/inward/record.uri?eid=2-s2.0-85060197218&doi=10.1080%2f10400435.2018.1522524&partnerID=40&md5=de746778f18c73a059cc0f792e80e921	Human Factors Research Group, The University of Nottingham, University Park, Nottingham, United Kingdom; Human Factors Research Group, The University of Nottingham, Nottingham, United Kingdom	Hermawati, S., Human Factors Research Group, The University of Nottingham, University Park, Nottingham, United Kingdom; Pieri, K., Human Factors Research Group, The University of Nottingham, Nottingham, United Kingdom	Assistive technologies (ATs) offer capabilities that were previously inaccessible to individuals with severe and profound hearing loss who have no or limited access to hearing aids and implants. This literature review aims to explore existing ATs and identify what still needs to be done. It is found that there is a lack of focus on the overall objectives of ATs. In addition, several other issues …	assistive technologies; design for all; participatory design; severe and profound hearing loss	Hearing aids; Product design; Assistive technology; Commercial Devices; Design for all; Hearing loss; Literature reviews; Participatory design; Sign language; Text content; Audition	Review	Scopus
Wu H.-K., Chen H.-R., Chen W.-Y., Lu C.-F., Tsai M.-W., Yu C.-H.	A novel instrumented walker for individualized visual cue setting for gait training in patients with Parkinson’s disease	2020	Assistive Technology		https://www.scopus.com/inward/record.uri?eid=2-s2.0-85059305270&doi=10.1080%2f10400435.2018.1525442&partnerID=40&md5=98306d78eb927f9071b201a2214ad490	Department of Physical Therapy and Assistive Technology, National Yang-Ming University, Taipei, Taiwan; Department of Computer Science and Information Engineering, National Central University, Taoyuan, Taiwan; Department of Biomedical Imaging and Radiological Sciences, National Yang-Ming University, Taipei, Taiwan	Wu, H.-K., Department of Physical Therapy and Assistive Technology, National Yang-Ming University, Taipei, Taiwan; Chen, H.-R., Department of Computer Science and Information Engineering, National Central University, Taoyuan, Taiwan; Chen, W.-Y., Department of Physical Therapy and Assistive Technology, National Yang-Ming University, Taipei, Taiwan; Lu, C.-F., Department of Biomedical Imaging and …	Patients with Parkinson’s disease suffer from gait disturbances, such as a shuffling and festinating gait, which reduces their quality of life. To circumvent this problem, external visual cues may be applied in gait training to maintain the integrity of motor function. However, conventional training methods, such as transverse lines stuck on the ground, are difficult to adjust and adapt to person…	gait training; Parkinsonian gait; Parkinson’s disease; visual cue	Festinating gaits; Gait disturbances; Gait training; Instrumented wheels; Parkinsonian gait; Training methods; Transverse lines; visual cue; Human rehabilitation equipment	Article	Scopus
Jones M.L., Morris J.T., Mueller J.L., Lippincott B., Sweatman W.M.	Regulating hearing aid compatibility of cell phones: results from a national survey	2020	Assistive Technology		https://www.scopus.com/inward/record.uri?eid=2-s2.0-85055147362&doi=10.1080%2f10400435.2018.1512174&partnerID=40&md5=22ec665e837fdb87ec38f70b1ab3f43c	Research Institute, Shepherd Center, Atlanta, GA, United States	Jones, M.L., Research Institute, Shepherd Center, Atlanta, GA, United States; Morris, J.T., Research Institute, Shepherd Center, Atlanta, GA, United States; Mueller, J.L., Research Institute, Shepherd Center, Atlanta, GA, United States; Lippincott, B., Research Institute, Shepherd Center, Atlanta, GA, United States; Sweatman, W.M., Research Institute, Shepherd Center, Atlanta, GA, United States	Accessibility of telecommunication technologies by people who are deaf or hard of hearing has been a critical issue since the invention of the telephone. As both telephone and hearing-aid technologies have evolved, finding compatible solutions has been an ongoing challenge. This paper uses the findings of a longitudinal study to examine the impact of Federal hearing-aid compatibility (HAC) regula…	assistive technology/AT; cell phone; hearing aid; policy; regulation	Cellular telephones; Electromagnetic pulse; Electromagnetic shielding; Hearing aids; Mobile telecommunication systems; Public policy; Sound reproduction; Surveys; Assistive technology; Cell phone; Federal communications commission; Hearing aid; Hearing aid compatibilities; regulation; Telecommunication technologies; Wireless service providers; Audition	Article	Scopus
Becerra L., Pedrozo Campos Antunes T., Capel H.M., Wiebe S.A., Adams K.D.	Testing of an assistive robot system for haptic exploration of objects	2020	Assistive Technology		https://www.scopus.com/inward/record.uri?eid=2-s2.0-85084787707&doi=10.1080%2f10400435.2018.1508094&partnerID=40&md5=709fd1801c887a513b2a5aed95e785ca	Faculty of Rehabilitation Medicine, University of Alberta, Edmonton, AB, Canada; Department of Psychology, University of Alberta, Edmonton, AB, Canada; Department of Health Sciences, Faculty of Medicine of ABC, Santo André, SP, Brazil	Becerra, L., Faculty of Rehabilitation Medicine, University of Alberta, Edmonton, AB, Canada; Pedrozo Campos Antunes, T., Faculty of Rehabilitation Medicine, University of Alberta, Edmonton, AB, Canada, Department of Health Sciences, Faculty of Medicine of ABC, Santo André, SP, Brazil; Capel, H.M., Faculty of Rehabilitation Medicine, University of Alberta, Edmonton, AB, Canada; Wiebe, S.A., Depar…	Introduction: When children with physical impairments cannot perform hand movements for haptic exploration, they may miss opportunities to learn the properties of objects. Assistive robots may enable them to make manipulation actions. Objective: To examine the differences between using a robotic teleoperation system with haptic feedback and manual exploration when making perceptual comparisons ab…	assistive robots; children with disabilities; children’s development; haptics; object exploration	Hardness; Robotics; Assistive robots; Haptic explorations; Mechanical flexibility; Perceptual information; Physical disability; Physical impairments; Robot end effector; Robotic teleoperation; End effectors	Article	Scopus
Pitt K., Brumberg J.	A screening protocol incorporating brain-computer interface feature matching considerations for augmentative and alternative communication	2020	Assistive Technology	1	https://www.scopus.com/inward/record.uri?eid=2-s2.0-85055860561&doi=10.1080%2f10400435.2018.1512175&partnerID=40&md5=d0fcdc7a30c08fcd1e5f64c8cb2d1cf3	Department of Speech-Language-Hearing: Sciences & Disorders, University of Kansas, Lawrence, KS, United States	Pitt, K., Department of Speech-Language-Hearing: Sciences & Disorders, University of Kansas, Lawrence, KS, United States; Brumberg, J., Department of Speech-Language-Hearing: Sciences & Disorders, University of Kansas, Lawrence, KS, United States	Purpose: The use of standardized screening protocols may inform brain-computer interface (BCI) research procedures to help maximize BCI performance outcomes and provide foundational information for clinical translation. Therefore, in this study we developed and evaluated a new BCI screening protocol incorporating cognitive, sensory, motor and motor imagery tasks. Methods: Following development, B…	Amyotrophic lateral sclerosis; assessment; augmentative and alternative communication; Brain-computer interface; motor imagery	Clinical research; Electric circuit breakers; Human rehabilitation engineering; Neurodegenerative diseases; Amyotrophic lateral sclerosis; assessment; Augmentative-and-alternative communication; Clinical translation; Motor imagery; Motor imagery tasks; Performance outcome; Screening protocol; Brain computer interface	Article	Scopus
Rice I., Jayaraman C., Pohlig R.T.	The short-term influence of rear wheel axle position and training on manual wheelchair propulsion technique in novice able-bodied participants during steady-state treadmill propulsion, a pilot study	2020	Assistive Technology		https://www.scopus.com/inward/record.uri?eid=2-s2.0-85055334718&doi=10.1080%2f10400435.2018.1504834&partnerID=40&md5=679ba996e0262b884709b7cd65bf1581	Department of Kinesiology and Community Health, University of Illinois at Urbana-Champaign, Champaign, IL, United States; Max Näder Lab for Rehabilitation and outcomes Center for Bionic Medicine Shirley Ryan AbilityLab, Chicago, IL, United States; Biostatistics Core Facility, College of Health Sciences, University of Delaware, Newark, DE, United States	Rice, I., Department of Kinesiology and Community Health, University of Illinois at Urbana-Champaign, Champaign, IL, United States; Jayaraman, C., Max Näder Lab for Rehabilitation and outcomes Center for Bionic Medicine Shirley Ryan AbilityLab, Chicago, IL, United States; Pohlig, R.T., Biostatistics Core Facility, College of Health Sciences, University of Delaware, Newark, DE, United States	Purpose: To examine if wheelchair fit influenced the effectiveness of video-based propulsion technique training. Method: Based on a cross sectional design, able-bodied participants (n = 21) received an optimally configured wheelchair (OCW; n = 11) or a nonoptimally configured wheelchair (NOCW; n = 10) to determine if propulsion technique was influenced by configuration before and after training. …	ergonomics; feedback; rehabilitation; wheelchairs	Contact angle; Ergonomics; Feedback; Patient rehabilitation; Sporting goods; Torque; Wheelchairs; Braking torque; Combined effect; Cross-sectional design; Manual wheelchair propulsions; Pilot studies; Power out put; Propulsion technique; Resultant forces; Propulsion	Article	Scopus
Joy J., Balakrishnan K., Madhavankutty S.	Developing a bilingual mobile dictionary for Indian Sign Language and gathering users experience with SignDict	2020	Assistive Technology		https://www.scopus.com/inward/record.uri?eid=2-s2.0-85055205741&doi=10.1080%2f10400435.2018.1508093&partnerID=40&md5=d8578ecda31ad73c3342d8b3d257c0b0	Department of Computer Applications, CUSAT, Kochi, India; Department of MCA, Federal Institute of Science and Technology, Angamaly, India	Joy, J., Department of Computer Applications, CUSAT, Kochi, India; Balakrishnan, K., Department of Computer Applications, CUSAT, Kochi, India; Madhavankutty, S., Department of MCA, Federal Institute of Science and Technology, Angamaly, India	Availability of a sign language dictionary is very important for the literacy of deaf people. But the intricacies involved in the representation of the sign language impede attempts at representing it in a printed format. A video-based solution helps to solve this problem. This article discusses the development of a bilingual mobile sign language dictionary which has features for converting camer…	assistive technology; Education; Electronic Aids to Daily Living; Mobile Assisted Language Learning; Sign Language	Character recognition; Education; Assistive technology; Electronic aids to daily livings; Indian sign languages; Indian sign languages (ISL); Mobile applications; Mobile assisted language learning; Mobile dictionaries; Sign language; Mobile computing; article; assistive technology; deaf education; human; human experiment; India; language development; mobile application; sign language; velocity	Article	Scopus
De Souza L.H., Frank A.O.	Clinical features of electric powered indoor/outdoor wheelchair users with spinal cord injuries: A cross-sectional study	2020	Assistive Technology		https://www.scopus.com/inward/record.uri?eid=2-s2.0-85055186315&doi=10.1080%2f10400435.2018.1503205&partnerID=40&md5=953ffd66302f2bbeaa073d3d8b7d7385	Department of Clinical Sciences and Institute for the Environment, Health and Society, Brunel University London, Uxbridge, Middlesex, United Kingdom; Stanmore Specialist Wheelchair Service, Royal National Orthopaedic Hospital, Stanmore, United Kingdom	De Souza, L.H., Department of Clinical Sciences and Institute for the Environment, Health and Society, Brunel University London, Uxbridge, Middlesex, United Kingdom; Frank, A.O., Department of Clinical Sciences and Institute for the Environment, Health and Society, Brunel University London, Uxbridge, Middlesex, United Kingdom, Stanmore Specialist Wheelchair Service, Royal National Orthopaedic Hos…	This article aims to describe the characteristics of those with a primary diagnosis of spinal cord injury (SCI) attending a specialist wheelchair service providing electric powered indoor/outdoor chairs (EPIOCs). This cross-sectional study, with retrospective review of electronic and case note records, explores the complexities of additional clinical features associated with SCI and disability in…	mobility; neuromuscular impairment; service delivery; wheeled mobility aids	Carrier mobility; Patient rehabilitation; Clinical features; Cross-sectional study; Multi-disciplinary teams; Neuromuscular impairments; Service delivery; Service-providing; Spinal cord injuries (SCI); Wheeled mobility; Wheelchairs	Article	Scopus
Morère Y., Bourhis G., Cosnuau K., Guilmois G., Rumilly E., Blangy E.	ViEW: A wheelchair simulator for driving analysis	2020	Assistive Technology	5	https://www.scopus.com/inward/record.uri?eid=2-s2.0-85055143629&doi=10.1080%2f10400435.2018.1503204&partnerID=40&md5=5d21965f2dc152975310ba5e0463e6c3	LCOMS, Lorraine University, Metz-Technopole, France; Centre de Médecine Physique de Réadaptation pour Enfants, IRR de Nancy, Flavigny sur Moselle, France	Morère, Y., LCOMS, Lorraine University, Metz-Technopole, France; Bourhis, G., LCOMS, Lorraine University, Metz-Technopole, France; Cosnuau, K., Centre de Médecine Physique de Réadaptation pour Enfants, IRR de Nancy, Flavigny sur Moselle, France; Guilmois, G., Centre de Médecine Physique de Réadaptation pour Enfants, IRR de Nancy, Flavigny sur Moselle, France; Rumilly, E., Centre de Médecine Physi…	The powered wheelchair (PW) has become an essential mobility assistive technology for people with motor disabilities. A critical step involved in maximizing the end-user experience is evaluating individual functional abilities. Using powered wheelchair simulation for driving analysis offers flexibility for safely evaluating the individual’s driving performance in a variable environment and situat…	driving learning; driving performance indicators; powered wheelchair simulator	Artificial life; Automobile drivers; Behavioral research; Benchmarking; Decision making; Simulators; Virtual reality; Assistive technology; Decision making tool; driving learning; Driving performance; Functional abilities; Performance indicators; Powered wheel chairs; Variable environment; Wheelchairs	Article	Scopus
Tai K.-C.	Equipment factors affecting identification of water level with echo for the blind	2020	Assistive Technology		https://www.scopus.com/inward/record.uri?eid=2-s2.0-85080992396&doi=10.1080%2f10400435.2018.1474284&partnerID=40&md5=80f84ad8acbee5637c4cfbe76c08fefa	Chang Jung Christian University, Tainan, Taiwan	Tai, K.-C., Chang Jung Christian University, Tainan, Taiwan	Blind people adopt their remaining intact senses to perceive the world for tasks such as determining the water level in a bowl. Pouring water into a bowl generates water sounds and echoes reflected in the bowl. This research develops a bowl with increased echo (called an echo bowl), and analyzes the accuracy of water levels perceived by visually impaired people using a container or a kettle to po…	blind people; echo; filled equipment; pouring; water level	Containers; Regression analysis; Blind people; echo; pouring; Simple linear regression analysis; Visually impaired people; Water sounds; Water levels	Article	Scopus
Steinert A., Eicher C., Haesner M., Steinhagen-Thiessen E.	Effects of a long-term smartphone-based self-monitoring intervention in patients with lipid metabolism disorders	2020	Assistive Technology	2	https://www.scopus.com/inward/record.uri?eid=2-s2.0-85053527007&doi=10.1080%2f10400435.2018.1493710&partnerID=40&md5=59c05107e56743af6ca9668f3b871f85	Geriatrics Research Group, Charité–Universitätsmedizin Berlin, Berlin, Germany	Steinert, A., Geriatrics Research Group, Charité–Universitätsmedizin Berlin, Berlin, Germany; Eicher, C., Geriatrics Research Group, Charité–Universitätsmedizin Berlin, Berlin, Germany; Haesner, M., Geriatrics Research Group, Charité–Universitätsmedizin Berlin, Berlin, Germany; Steinhagen-Thiessen, E., Geriatrics Research Group, Charité–Universitätsmedizin Berlin, Berlin, Germany	The majority of lipid metabolism disorders can be managed well if patients adhere to their therapies. Self-monitoring can drive adherence with regards to medication intake, physical activities, and nutrition. Technical devices like smartphones can further support its users to achieve health-related goals. In a clinical trial, 100 patients with lipid metabolism disorders were asked to use a smartp…	app usage; disease management; electronic aids to daily living; information technology and telecommunications; lipid metabolism disorder; older adults; self-monitoring; smartphone usage; usability	Diseases; Metabolism; Motivation; Smartphones; Disease management; Electronic aids to daily livings; Lipid metabolisms; Older adults; Self-monitoring; usability; Patient treatment	Article	Scopus
Sprigle S., Pubillones S.	Developing a process for assessing equivalency of wheelchair cushion pressure redistribution performance	2020	Assistive Technology		https://www.scopus.com/inward/record.uri?eid=2-s2.0-85053517555&doi=10.1080%2f10400435.2018.1493709&partnerID=40&md5=86df26e7d8cf442f164487f5a1ff0629	Rehabilitation Engineering and Applied Research Lab, Georgia Institute of Technology, Atlanta, GA, United States	Sprigle, S., Rehabilitation Engineering and Applied Research Lab, Georgia Institute of Technology, Atlanta, GA, United States; Pubillones, S., Rehabilitation Engineering and Applied Research Lab, Georgia Institute of Technology, Atlanta, GA, United States	For wheelchair users who are at risk for developing pressure ulcers, cushion prescription seeks to address tissue integrity. Because many designs of wheelchair cushions exist, a need exists to estimate their performance in supporting the body. The objective of this research was to develop an approach to assess the equivalency of cushions with respect to their pressure redistribution performance. …	instrumentation; policy and legislation; positioning and support surfaces; seating; service delivery; standards	Human rehabilitation equipment; Standards; instrumentation; Policy and legislations; seating; Service delivery; Support surfaces; Wheelchairs	Article	Scopus
Tirkel T., Edan Y., Khvorostianov N., Bar-Haim S.	SIT LESS: A prototype home-based system for monitoring older adults sedentary behavior	2020	Assistive Technology	1	https://www.scopus.com/inward/record.uri?eid=2-s2.0-85053512929&doi=10.1080%2f10400435.2018.1493707&partnerID=40&md5=5471b60121ec3a38a71ad6c9328a7bb6	Industrial Engineering and Management, Ben-Gurion University of the Negev, Beer-Sheva, Israel; Communications, Ben-Gurion University of the Negev, Beer-Sheva, Israel; Physical Therapy, Ben-Gurion University of the Negev, Beer-Sheva, Israel	Tirkel, T., Industrial Engineering and Management, Ben-Gurion University of the Negev, Beer-Sheva, Israel; Edan, Y., Industrial Engineering and Management, Ben-Gurion University of the Negev, Beer-Sheva, Israel; Khvorostianov, N., Communications, Ben-Gurion University of the Negev, Beer-Sheva, Israel; Bar-Haim, S., Physical Therapy, Ben-Gurion University of the Negev, Beer-Sheva, Israel	This paper presents the overall design of a prototype home-based system aimed to reduce sedentary behavior of older adults. Quantitative performance indicators were developed to measure the sedentary behavior and daily activities of an older adult. The sedentary behavior is monitored by identifying individual positions (standing, sitting, and lying) within the field of view of a Microsoft Kinect …	human activity recognition; intelligent user interface; kinect; lifestyle; older adults; physical activity; sedentary behavior	Human rehabilitation equipment; Human activity recognition; Intelligent User Interfaces; kinect; lifestyle; Older adults; Physical activity; sedentary behavior; User interfaces	Article	Scopus
Gharini M., Mohammadi Moghaddam M., Farahmand F.	Personalized design of ankle-foot prosthesis based on computer modeling of amputee locomotion	2020	Assistive Technology	1	https://www.scopus.com/inward/record.uri?eid=2-s2.0-85053510798&doi=10.1080%2f10400435.2018.1493708&partnerID=40&md5=39d847fdcc02c853252f6e8b3c0dd3cb	Department of Mechanical Engineering, Tarbiat Modares University, Tehran, Iran; Department of Mechanical Engineering, Sharif University of Technology, Tehran, Iran	Gharini, M., Department of Mechanical Engineering, Tarbiat Modares University, Tehran, Iran; Mohammadi Moghaddam, M., Department of Mechanical Engineering, Tarbiat Modares University, Tehran, Iran; Farahmand, F., Department of Mechanical Engineering, Sharif University of Technology, Tehran, Iran	This study proposes a computer modeling approach to find the optimal damping coefficients of the viscoelastic ankle-foot prostheses for each specific amputee. A two-dimensional locomotion model was developed for a transtibial amputee and personalized using his body measures and the reference gait pattern of an equivalent able-bodied subject. By employing the forward dynamic simulation, the ampute…	below-knee amputee; locomotion model; optimal damping coefficients	Artificial limbs; Damping; below-knee amputee; Computer modeling; Gait pattern; Model prediction; Optimal damping; Total work; Transtibial amputees; Cost functions	Article	Scopus
Steel E.J.	Content analysis to locate assistive technology in Queensland’s motor injury insurance rehabilitation legislation and guidelines	2020	Assistive Technology		https://www.scopus.com/inward/record.uri?eid=2-s2.0-85052088965&doi=10.1080%2f10400435.2018.1485780&partnerID=40&md5=88ad2972adbbd70977b902a0705b9b64	School of Health and Wellbeing, The University of Southern Queensland, Ipswich, Australia; TC Beirne School of Law, The University of Queensland, St Lucia, Australia	Steel, E.J., School of Health and Wellbeing, The University of Southern Queensland, Ipswich, Australia, TC Beirne School of Law, The University of Queensland, St Lucia, Australia	Introduction: Reforms to Australia’s disability and rehabilitation sectors have espoused the potential of assistive technology as an enabler. As new insurance systems are being developed it is timely to examine the structure of existing systems. This exploratory study examined the policies guiding assistive technology provision in the motor accident insurance sector of one Australian state. Metho…	policy and legislation; service delivery; standards	Accidents; Insurance; Iterative methods; Standards; Assistive technology; Exploratory studies; Injury insurances; Insurance systems; Integrated approach; Legislative frameworks; Policy and legislations; Service delivery; Laws and legislation	Article	Scopus
Rocha L.S., Sawatzky B., Mortenson W.B.	Efficiency and perceived exertion of novel wheelchair wheels: A comparative study	2020	Assistive Technology		https://www.scopus.com/inward/record.uri?eid=2-s2.0-85050663558&doi=10.1080%2f10400435.2018.1475431&partnerID=40&md5=00da1baa213d57f1bc9fb4ba78ae9641	International Collaboration on Repair Discoveries (ICORD), UBC Faculty of Medicine and Vancouver Coastal Health (VCH) Research Institute, Vancouver, Canada; Department of Orthopaedics, University of British Columbia, Vancouver, Canada; Department of Occupational Science & Occupational Therapy, University of British Columbia, Vancouver, Canada	Rocha, L.S., International Collaboration on Repair Discoveries (ICORD), UBC Faculty of Medicine and Vancouver Coastal Health (VCH) Research Institute, Vancouver, Canada; Sawatzky, B., International Collaboration on Repair Discoveries (ICORD), UBC Faculty of Medicine and Vancouver Coastal Health (VCH) Research Institute, Vancouver, Canada, Department of Orthopaedics, University of British Columbia…	New geared wheelchair wheels have been developed allowing the user to pull backwards on the rims to move forward. Theoretically, this utilizes larger muscle groups compared to conventional propulsion preventing repetitive stress injuries. This study compared the gross mechanical efficiency (GME), perceived effort and energy expenditure of propelling the wheelchair using two types of these geared …	ergonomics; mobility; wheelchair; energy expenditure	Carrier mobility; Ergonomics; Propulsion; Wheelchairs; Comparative studies; Conventional propulsion; Energy expenditure; Forward propulsion; Mechanical efficiency; Perceived exertion; Repeated measures; Repetitive stress injuries; Wheels	Article	Scopus
Aspiranti K.B., Larwin K.H., Schade B.P.	iPads/tablets and students with autism: A meta-analysis of academic effects	2020	Assistive Technology		https://www.scopus.com/inward/record.uri?eid=2-s2.0-85077509911&doi=10.1080%2f10400435.2018.1463575&partnerID=40&md5=62fa7a720228c21763d8cc1ed0949d69	Department of Counseling, School Psychology, and Educational Leadership, Youngstown State University, Youngstown, OH, United States	Aspiranti, K.B., Department of Counseling, School Psychology, and Educational Leadership, Youngstown State University, Youngstown, OH, United States; Larwin, K.H., Department of Counseling, School Psychology, and Educational Leadership, Youngstown State University, Youngstown, OH, United States; Schade, B.P., Department of Counseling, School Psychology, and Educational Leadership, Youngstown Stat…	Since the introduction of iPads in 2010, educators have been working to effectively incorporate this technology as a supplement to curriculum and a tool to increase student engagement and student achievement. The current investigation examines the effectiveness of iPad applications in supporting the instruction of students identified on the autism spectrum. Specifically, this investigation provid…	developmental disability; education; emerging trends	Curricula; Diseases; Education; Hand held computers; Developmental disability; Emerging trends; iPad applications; Learning outcome; Meta analysis; Student achievement; Student engagement; Student learning outcomes; Students	Article	Scopus
Berthelette M., Mann D.D., Ripat J., Glazebrook C.M.	Assessing manual wheelchair caster design for mobility in winter conditions	2020	Assistive Technology		https://www.scopus.com/inward/record.uri?eid=2-s2.0-85077497383&doi=10.1080%2f10400435.2018.1464080&partnerID=40&md5=63e6487a34d87fd6ef833da9d5a3e092	Department of Biosystems Engineering, University of Manitoba, Winnipeg, MB, Canada; Department of Occupational Therapy, University of Manitoba, Winnipeg, MB, Canada; Faculty of Kinesiology and Recreation Management, University of Manitoba, Winnipeg, MB, Canada	Berthelette, M., Department of Biosystems Engineering, University of Manitoba, Winnipeg, MB, Canada; Mann, D.D., Department of Biosystems Engineering, University of Manitoba, Winnipeg, MB, Canada; Ripat, J., Department of Occupational Therapy, University of Manitoba, Winnipeg, MB, Canada; Glazebrook, C.M., Faculty of Kinesiology and Recreation Management, University of Manitoba, Winnipeg, MB, Can…	Wheelchair users who live in cold climates are faced with daily difficulties related to personal independence and societal inclusion as their assistive devices are unable to overcome the physical barriers created by snow and ice. The purpose of the research was to evaluate four commercially available casters to determine which caster performed best on snow-covered surfaces. Performance measures i…	mobility; usability; wheeled mobility aids	Carrier mobility; Travel time; Wheelchairs; Assistive devices; Manual wheelchair; Performance measure; Physical barriers; usability; Wheelchair users; Wheeled mobility; Winter conditions; Snow	Article	Scopus
Jarl G., Lundqvist L.-O.	An alternative perspective on assistive technology: The person–environment–tool (PET) model	2020	Assistive Technology	3	https://www.scopus.com/inward/record.uri?eid=2-s2.0-85065504570&doi=10.1080%2f10400435.2018.1467514&partnerID=40&md5=96e2a4637b9c5bd692b473ada716eb59	Department of Prosthetics and Orthotics, Faculty of Medicine and Health, Örebro University, Örebro, Sweden; University Health Care Research Centre, Faculty of Medicine and Health, Örebro University, Örebro, Sweden	Jarl, G., Department of Prosthetics and Orthotics, Faculty of Medicine and Health, Örebro University, Örebro, Sweden, University Health Care Research Centre, Faculty of Medicine and Health, Örebro University, Örebro, Sweden; Lundqvist, L.-O., University Health Care Research Centre, Faculty of Medicine and Health, Örebro University, Örebro, Sweden	The medical and social models of disability categorize people as ablebodied or disabled. In contrast, the biopsychosocial model, which forms the basis for the International Classification of Functioning, Disability and Health (ICF), suggests a universalistic perspective on human functioning, encompassing all human beings. In this article, we argue that the artificial separation of function-enhanc…	activities of daily living; environmental modifications; universal design	Human rehabilitation equipment; Activities of Daily Living; Artificial separation; Assistive technology; Conceptual model; environmental modifications; Human activities; Technology use; Universal Design; Environmental technology	Article	Scopus
Tafti N., Karimlou M., Mardani M.A., Jafarpisheh A.S., Aminian G.R., Safari R.	Development and preliminary evaluation of a new anatomically based prosthetic alignment method for below-knee prosthesis	2020	Assistive Technology		https://www.scopus.com/inward/record.uri?eid=2-s2.0-85049118565&doi=10.1080%2f10400435.2018.1467513&partnerID=40&md5=9dde42aa8fb2ccb68a906be81c5487c1	Department of Orthotics and Prosthetics, University of Social Welfare and Rehabilitation Sciences, Tehran, Iran; Department of Epidemiology and Biostatistics, Tehran Medical Sciences Branch, Islamic Azad University, Tehran, Iran; Department of Ergonomics, University of Social Welfare and Rehabilitation Sciences, Tehran, Iran; Health and Social Care Research Centre, University of Derby, Derby, Uni…	Tafti, N., Department of Orthotics and Prosthetics, University of Social Welfare and Rehabilitation Sciences, Tehran, Iran; Karimlou, M., Department of Epidemiology and Biostatistics, Tehran Medical Sciences Branch, Islamic Azad University, Tehran, Iran; Mardani, M.A., Department of Orthotics and Prosthetics, University of Social Welfare and Rehabilitation Sciences, Tehran, Iran; Jafarpisheh, A.S…	The objectives of current study were to a) assess similarities and relationships between anatomical landmark-based angles and distances of lower limbs in unilateral transtibial amputees and b) develop and evaluate a new anatomically based static prosthetic alignment method. First substudy assessed the anthropometrical differences and relationships between the lower limbs in the photographs taken …	anatomical landmarks; anthropometry; laser instrument; prosthetic alignment; transtibial prosthesis	Alignment; Anthropometry; Knee prostheses; Regression analysis; Alignment methods; Anatomical landmarks; Anthropometric parameters; Below-knee prosthesis; Laser instrument; Trans-tibial prosthesis; Transtibial amputees; Transverse planes; Artificial limbs	Article	Scopus
Tofani M., Candeloro C., Sabbadini M., Lucibello L., Figura M., Fabbrini G., Galeoto G., Castelli E.	The psychosocial impact of assistive device scale: Italian validation in a cohort of nonambulant people with neuromotor disorders	2020	Assistive Technology	17	https://www.scopus.com/inward/record.uri?eid=2-s2.0-85049116109&doi=10.1080%2f10400435.2018.1469553&partnerID=40&md5=656b774f3c181771c3d2369ded07f16d	Department of Neuroscience and Neurorehabilitation, Bambino Gesù Children’s Hospital, Rome, Italy; ITOP Officine Ortopediche, Palestrina (Rome), Italy; Sapienza Università of Rome, Rome, Italy; Department of Neurology and Psychiatry, “Policlinico Umberto I” University Hospital Sapienza- University of Rome, IRCSS Neuromed Institute, Pozzilli (IS), Italy; Department of Public Health and Infectious …	Tofani, M., Department of Neuroscience and Neurorehabilitation, Bambino Gesù Children’s Hospital, Rome, Italy; Candeloro, C., Department of Neuroscience and Neurorehabilitation, Bambino Gesù Children’s Hospital, Rome, Italy; Sabbadini, M., Department of Neuroscience and Neurorehabilitation, Bambino Gesù Children’s Hospital, Rome, Italy; Lucibello, L., ITOP Officine Ortopediche, Palestrina (Rome),…	The importance of adaptive seating system on body structure and function is widely accepted, but its impact on psychosocial aspects needs more consideration by health professionals. This article describes the Italian validation of the Psychosocial Impact of Assistive Device Scale (IT-PIADS) for non-ambulant people with neuromotor disorders. Once agreement has been given by the original authors, t…	assistive technology; Italian; outcome measure (health assessment); PIADS; psychosocial; validation	Correlation methods; Assistive technology; Health assessments; Italian; PIADS; psychosocial; validation; Clinical research; adult; article; assistive technology; concurrent validity; controlled study; correlation coefficient; Cronbach alpha coefficient; female; human; human cell; human experiment; internal consistency; major clinical study; male; motoneuron; perception; self esteem; test retest r…	Article	Scopus
Radder B., Prange-Lasonder G.B., Kottink A.I.R., Holmberg J., Sletta K., Van Dijk M., Meyer T., Buurke J.H., Rietman J.S.	The effect of a wearable soft-robotic glove on motor function and functional performance of older adults	2020	Assistive Technology	6	https://www.scopus.com/inward/record.uri?eid=2-s2.0-85047411145&doi=10.1080%2f10400435.2018.1453888&partnerID=40&md5=481c55df28a1063a686d40f46ee1dd77	Roessingh Research and Development, Enschede, Netherlands; Department of Biomechanical Engineering, University of Twente, Enschede, Netherlands; Department of Biosystems and Signals, University of Twente, Enschede, Netherlands; Eskilstuna Kommun Vård-och omsorgsförvaltningen, Eskilstuna, Sweden; National Foundation for the Elderly, Bunnik, Netherlands; terzStiftung, Berlingen, Switzerland; Depart…	Radder, B., Roessingh Research and Development, Enschede, Netherlands, Department of Biomechanical Engineering, University of Twente, Enschede, Netherlands; Prange-Lasonder, G.B., Roessingh Research and Development, Enschede, Netherlands, Department of Biomechanical Engineering, University of Twente, Enschede, Netherlands; Kottink, A.I.R., Roessingh Research and Development, Enschede, Netherlands…	Reduced grip strength, resulting in difficulties in performing daily activities, is a common problem in the population of older adults. Newly developed soft-robotic devices have the potential to support older adults with reduced grip in daily activities. The objective of this study was to evaluate the direct, assistive effect of grip support from the wearable, soft-robotic ironHand glove. In tota…	activities of daily living; older adults; orthotics; robotics	Orthotics; Wearable technology; Activities of Daily Living; Cross-sectional study; Daily activity; Design adaptations; Functional performance; Older adults; Robotic devices; Task performance; Robotics	Article	Scopus
Okonji P.E., Okiki O.C., Ogwezzy D.	Perceived importance and difficulty of online activities among visually impaired persons in Nigeria	2020	Assistive Technology		https://www.scopus.com/inward/record.uri?eid=2-s2.0-85047380807&doi=10.1080%2f10400435.2018.1457574&partnerID=40&md5=1405ae6e77d80dffcc37d5f34adfd9c4	Research & Innovation, University of Lagos, Lagos, Nigeria; Main Library, University of Lagos, Lagos, Nigeria; Optical Technology, School of Health Technology, Ughelli, Nigeria	Okonji, P.E., Research & Innovation, University of Lagos, Lagos, Nigeria; Okiki, O.C., Main Library, University of Lagos, Lagos, Nigeria; Ogwezzy, D., Optical Technology, School of Health Technology, Ughelli, Nigeria	This study investigated perceived relevance of and difficulties in access to day-to-day online activities among visually impaired computer users who used screen readers. The 98 participants in the study were grouped into visually impaired adults (aged 20–59, n = 60) and visually impaired older adults (aged 60 and over, n = 38). Data were collected in structured interview questionnaires with Liker…	activities of daily living; older adults; visual impairment	Electronic mail; Activities of Daily Living; Health informations; Older adults; Online activities; Perceived relevances; Visual impairment; Visually impaired; Visually impaired persons; Surveys	Article	Scopus
Fudickar S., Kiselev J., Frenken T., Wegel S., Dimitrowska S., Steinhagen-Thiessen E., Hein A.	Validation of the ambient TUG chair with light barriers and force sensors in a clinical trial	2020	Assistive Technology	5	https://www.scopus.com/inward/record.uri?eid=2-s2.0-85047169587&doi=10.1080%2f10400435.2018.1446195&partnerID=40&md5=06595b018f426fadca4df877caafdf0b	Department of Health Services Research, University of Oldenburg, School of Medicine and Health Sciences, Oldenburg, Germany; Geriatrics Research Group, Charité Universitätsmedizin Berlin, Germany; OFFIS–Institute for Information Technology, Oldenburg, Germany	Fudickar, S., Department of Health Services Research, University of Oldenburg, School of Medicine and Health Sciences, Oldenburg, Germany; Kiselev, J., Geriatrics Research Group, Charité Universitätsmedizin Berlin, Germany; Frenken, T., OFFIS–Institute for Information Technology, Oldenburg, Germany; Wegel, S., Geriatrics Research Group, Charité Universitätsmedizin Berlin, Germany; Dimitrowska, S.…	To initiate appropriate interventions and avoid physical decline, comprehensive measurements are needed to detect functional changes in elderly people at the earliest possible stage. The established Timed Up&Go (TUG) test takes little time and, due to its standardized and easy procedure, can be conducted by elderly people in their own homes without clinical guidance. Therefore, cheap light barrie…	assessment; falls; mobility; older adults	Carrier mobility; Human rehabilitation equipment; Accuracy enhancement; assessment; Comprehensive measurement; falls; Functional changes; Linear modeling; Older adults; Root mean square errors; Mean square error	Article	Scopus
Heath D., Babu R.	Foundations and affordances of workplace assistive technology: The case of mobile and enabling IT for workers with visual impairments	2020	Assistive Technology		https://www.scopus.com/inward/record.uri?eid=2-s2.0-85096142049&doi=10.1080%2f10400435.2020.1812764&partnerID=40&md5=f97d450f42e277eedc46fa9ddc94ab9e	Information Systems Department, University of Wisconsin, Oshkosh, United States; Envision Research Institute, Lead Accessibility Scientist, Envision, Inc, Wichita, KS, United States	Heath, D., Information Systems Department, University of Wisconsin, Oshkosh, United States; Babu, R., Envision Research Institute, Lead Accessibility Scientist, Envision, Inc, Wichita, KS, United States	Smartphones, with their built-in cameras, speech synthesizers, processing power, sensors, and network connectivity have established themselves as a fertile and ubiquitous platform for software developers interested in augmenting the capabilities of users with visual impairments. When fitted with readily available nonvisual apps, they comprise a mobile and enabling IT bundle (ME-IT) which can affo…	assistive technology; Delphi; enablement; mobile IT	Human engineering; Microcomputers; Speech synthesis; Assistive technology; Context- awareness; Mobile Technology; Network connectivity; Portable computers; Software developer; Speech synthesizer; Visual properties; Employment	Article	Scopus
Fraser A.M., Bevill G.R., Lundy M.S., Aceros J.	Safety analysis of battery-powered ride-on toy car with seat and restraint system modifications	2020	Assistive Technology		https://www.scopus.com/inward/record.uri?eid=2-s2.0-85096129315&doi=10.1080%2f10400435.2020.1829175&partnerID=40&md5=846dfd0c329629f2d2963430b4639b91	College of Computing, Engineering and Construction, Mechanical Engineering, University of North Florida, Jacksonville, FL, United States	Fraser, A.M., College of Computing, Engineering and Construction, Mechanical Engineering, University of North Florida, Jacksonville, FL, United States; Bevill, G.R., College of Computing, Engineering and Construction, Mechanical Engineering, University of North Florida, Jacksonville, FL, United States; Lundy, M.S., College of Computing, Engineering and Construction, Mechanical Engineering, Univer…	Modified battery-powered ride-on toy cars represent novel rehabilitation tools for children with disabilities. However, safety concerns exist with the use of these battery-power toys and pose a barrier for the growth of adaptive ride-on toy programs due to the lack of evidence demonstrating that modifications made to these cars are safe. Within this context, the purpose of this study was to inves…	developmental disability; falls; mobility; pediatrics; recreation	Patient rehabilitation; Safety engineering; Toys; Battery power; Battery powered; Children with disabilities; Harness systems; Related injuries; Restraint systems; Safety analysis; Safety concerns; Automotive batteries	Article	Scopus
Kulich H.R., Bass S.R., Koontz A.M.	Rehabilitation professional and user evaluation of an integrated push-pull lever drive system for wheelchair mobility	2020	Assistive Technology		https://www.scopus.com/inward/record.uri?eid=2-s2.0-85096094633&doi=10.1080%2f10400435.2020.1836068&partnerID=40&md5=7d6a570d369ac90889390b8afb6b0f5c	Human Engineering Research Laboratories, VA Pittsburgh Healthcare System, Pittsburgh, PA, United States; Department of Rehabilitation Science and Technology, University of Pittsburgh, Pittsburgh, PA, United States	Kulich, H.R., Human Engineering Research Laboratories, VA Pittsburgh Healthcare System, Pittsburgh, PA, United States, Department of Rehabilitation Science and Technology, University of Pittsburgh, Pittsburgh, PA, United States; Bass, S.R., Human Engineering Research Laboratories, VA Pittsburgh Healthcare System, Pittsburgh, PA, United States, Department of Rehabilitation Science and Technology, …	Wheeled mobility devices enable persons with limited mobility to maintain an independent lifestyle. Lever-drive propulsion options have been shown to increase wheeled mobility device efficiency while reducing physical strain on users. Despite these benefits, they have not been widely adopted for everyday use. Two novel lever-drive devices (RoScooter and RoTrike) provide an alternative to pushrim …	assessment; usability; wheeled mobility aids	Propulsion; Device efficiency; Lever mechanism; Physical strains; Reversal methods; Scoring systems; User evaluations; Wheelchair mobility; Wheeled mobility; Wheelchairs	Article	Scopus
Auger C., Mortenson W.B., Jutai J.W., Seguin-Tremblay N., Chenel V., Guay M.	Older adults’ use of an online decision support system: Usability and stability of assistive technology recommendations	2020	Assistive Technology		https://www.scopus.com/inward/record.uri?eid=2-s2.0-85092597817&doi=10.1080%2f10400435.2020.1815251&partnerID=40&md5=2c8be33e6a1cae1359288a8bb5054595	Center for Interdisciplinary Research in Rehabilitation of Greater Montreal, Montréal, Canada; School of Rehabilitation, Université de Montréal, Montréal, Canada; Department of Occupational Science & Occupational Therapy, University of British Columbia, Vancouver, Canada; Interdisciplinary School of Health Sciences, University of Ottawa, Ottawa, Canada; LIFE Research Institute, Ottawa, Canada; Sc…	Auger, C., Center for Interdisciplinary Research in Rehabilitation of Greater Montreal, Montréal, Canada, School of Rehabilitation, Université de Montréal, Montréal, Canada; Mortenson, W.B., Department of Occupational Science & Occupational Therapy, University of British Columbia, Vancouver, Canada; Jutai, J.W., Interdisciplinary School of Health Sciences, University of Ottawa, Ottawa, Canada, LI…	Online decision support systems (DSS) may help older adults self-select assistive technology (AT) by offering recommendations. User interactions with DSSs may change the recommendations they receive. Objective: We evaluated recommendations stability and usability of an online DSS. Methods: Middle-aged and older adults (n = 43) were observed while using the DSS. The stability of DSS recommendation…	activities of daily living; aging; assistive technology; decision support system; information and communication technologies; validation studies	ISO Standards; Online systems; System stability; Usability engineering; Assistive technology; Matching rules; Older adults; Online decisions; Time points; User interaction; Decision support systems; adult; aged; aging; article; assistive technology; clinical article; daily life activity; decision support system; female; human; human experiment; male; middle aged; validation study	Article	Scopus
Sprigle S., Chen J., Hughes D.	Assessment of wheeled mobility devices provided to a commercially insured population in 2017	2020	Assistive Technology		https://www.scopus.com/inward/record.uri?eid=2-s2.0-85092585228&doi=10.1080%2f10400435.2020.1812765&partnerID=40&md5=86b6124534a2052a85fe6f1590ffe233	Rehabilitation Engineering and Applied Research Lab, Georgia Institute of Technology, Atlanta, GA, United States; Health Economics and Analytics Lab, Georgia Institute of Technology, Atlanta, GA, United States; Harvey L. Neiman Health Policy Institute, Reston, VA, United States; Department of Radiology and Imaging Sciences, Emory University, Atlanta, GA, United States	Sprigle, S., Rehabilitation Engineering and Applied Research Lab, Georgia Institute of Technology, Atlanta, GA, United States; Chen, J., Health Economics and Analytics Lab, Georgia Institute of Technology, Atlanta, GA, United States; Hughes, D., Health Economics and Analytics Lab, Georgia Institute of Technology, Atlanta, GA, United States, Harvey L. Neiman Health Policy Institute, Reston, VA, Un…	In the United States, wheeled mobility devices (WMD) are classified as durable medical equipment (DME). Consistent with the definition of DME, wheeled mobility devices are typically covered by health insurance when deemed medically necessary. Despite the number of persons using wheelchairs, little knowledge is available about the types of wheelchairs provided, user’s specific diagnoses and the co…	policy and legislation; service delivery; wheeled mobility aids	Cost accounting; Diagnosis; Health insurance; Seating for disabled persons; Wheelchairs; Manual wheelchair; Seating and mobility; Specific diagnosis; Wheeled mobility; Cost benefit analysis	Article	Scopus
Barbareschi G., Sonenblum S., Holloway C., Sprigle S.	Does the setting matter? Observing wheelchair transfers across different environmental conditions	2020	Assistive Technology		https://www.scopus.com/inward/record.uri?eid=2-s2.0-85092503462&doi=10.1080%2f10400435.2020.1818328&partnerID=40&md5=dae8d1c0e3b94c004d6617f894e3c484	UCL Interaction Centre, University College London, London, United Kingdom; Rehabilitation Engineering and Applied Research, Georgia Institute of Technology, Atlanta, GA, United States	Barbareschi, G., UCL Interaction Centre, University College London, London, United Kingdom; Sonenblum, S., Rehabilitation Engineering and Applied Research, Georgia Institute of Technology, Atlanta, GA, United States; Holloway, C., UCL Interaction Centre, University College London, London, United Kingdom; Sprigle, S., Rehabilitation Engineering and Applied Research, Georgia Institute of Technology…	The setting in which wheelchair transfers are performed can affect the difficulty and the risks associated with completion. This article presents results from an observational study involving 13 wheelchair users performing independent transfers across four settings. The aim is to understand how the environment affects how different types of independent transfers are performed. Descriptive analysi…	activities of daily living; upper limb injury; wheelchair transfers; wheelchair users	Human rehabilitation equipment; Assessment instruments; Descriptive analysis; Environmental conditions; Environmental constraints; Objective assessment; Observational study; Perceived difficulties; Wheelchair users; Wheelchairs	Article	Scopus
Brasil-Barros-da-Silva D., Fachin-Martins E.	Pain mapping and health-related conditions in relation to forearm crutch usage: A cross-sectional study	2020	Assistive Technology		https://www.scopus.com/inward/record.uri?eid=2-s2.0-85092478212&doi=10.1080%2f10400435.2020.1819914&partnerID=40&md5=1d8b73f946ff844abb9329f678205759	NTAAI – Núcleo De Tecnologia Assistiva, Acessibilidade E Inovação, Universidade De Brasília, Brasília, Brazil	Brasil-Barros-da-Silva, D., NTAAI – Núcleo De Tecnologia Assistiva, Acessibilidade E Inovação, Universidade De Brasília, Brasília, Brazil; Fachin-Martins, E., NTAAI – Núcleo De Tecnologia Assistiva, Acessibilidade E Inovação, Universidade De Brasília, Brasília, Brazil	To explore pain complaints and health-related conditions, verifying if permanent or temporary usage of forearm crutches could be associated with them. We designed a cross-sectional study from a sample who answered a five-month public call. We organized data into five domains: (1) diseases, signs and symptoms; (2) personal factors related to age, sex, marital status, and paid occupation; (3) body …	equipment and supplies; geographic mapping; health surveys; locomotion; self-help devices	Environmental technology; Mapping; Acute and chronic pain; Arterial pressures; Assistive technology; Body mass index; Cross-sectional study; Environmental factors; Functional components; Health condition; Health	Article	Scopus
Gormley J., Fager S.K.	Preference and visual cognitive processing demands of alphabetic and QWERTY keyboards of individuals with and without brain injury	2020	Assistive Technology		https://www.scopus.com/inward/record.uri?eid=2-s2.0-85092455581&doi=10.1080%2f10400435.2020.1826006&partnerID=40&md5=f260343696fbba7fb05803bb4b3121b9	Department of Speech-Language Pathology Department, Munroe-Meyer Institute, University of Nebraska Medical Center, Omaha, NE, United States; Institute for Rehabilitation Science and Engineering, Madonna Rehabilitation Hospital, Lincoln, NE, United States	Gormley, J., Department of Speech-Language Pathology Department, Munroe-Meyer Institute, University of Nebraska Medical Center, Omaha, NE, United States; Fager, S.K., Institute for Rehabilitation Science and Engineering, Madonna Rehabilitation Hospital, Lincoln, NE, United States	Following a severe brain injury (BI), some literate individuals who require augmentative and alternative communication (AAC) strategies to support communication may benefit from the use of onscreen keyboards to generate text. A range of layouts are available to these individuals within specialized communication software. However, a paucity of information is available to describe user preferences,…	augmentative and alternative communication; communication; computer access	Computer keyboards; Decision making; Eye tracking; Human rehabilitation engineering; Augmentative-and-alternative communication; Clinical decision making; Cognitive processing; Communication efficiency; Communication software; Eye-tracking analysis; Keyboard interface; On-screen keyboard; User experience	Article	Scopus
Nair V., Olmschenk G., Seiple W.H., Zhu Z.	ASSIST: Evaluating the usability and performance of an indoor navigation assistant for blind and visually impaired people	2020	Assistive Technology		https://www.scopus.com/inward/record.uri?eid=2-s2.0-85090112441&doi=10.1080%2f10400435.2020.1809553&partnerID=40&md5=553e69691ba7c603bba17925cbdbb11b	Department of Computer Science, The City College of New York, New York, United States; Department of Computer Science, CUNY Graduate Center, New York, United States; Lighthouse Guild, New York, United States; Department of Ophthalmology, NYU School of Medicine, New York, United States	Nair, V., Department of Computer Science, The City College of New York, New York, United States; Olmschenk, G., Department of Computer Science, The City College of New York, New York, United States, Department of Computer Science, CUNY Graduate Center, New York, United States; Seiple, W.H., Lighthouse Guild, New York, United States, Department of Ophthalmology, NYU School of Medicine, New York, U…	This paper describes the interface and testing of an indoor navigation app–ASSIST–that guides blind & visually impaired (BVI) individuals through an indoor environment with high accuracy while augmenting their understanding of the surrounding environment. ASSIST features personalized interfaces by considering the unique experiences that BVI individuals have in indoor wayfinding and offers multipl…	blind and visually impaired; human subject studies; Indoor navigation; mobile apps	Air navigation; Data acquisition; Environmental testing; Navigation; User experience; User interfaces; Walking aids; Blind and visually impaired; In-door navigations; Indoor environment; Multimodal feedback; Navigational guidance; Performance study; Personalized interface; Surrounding environment; Indoor positioning systems	Article	Scopus
Gulsen C., PT, MSc, Soke F., PT, PhD, Eldemir K., PT, MSc, Apaydin Y., PT, MSc, Ozkul C., PT, PhD, Guclu-Gunduz A., PT, Prof., Akcali D.T., MD, Prof.	Effect of fully immersive virtual reality treatment combined with exercise in fibromyalgia patients: a randomized controlled trial	2020	Assistive Technology		https://www.scopus.com/inward/record.uri?eid=2-s2.0-85087812673&doi=10.1080%2f10400435.2020.1772900&partnerID=40&md5=2a813f877d41e8ca142608a00f3159c8	Faculty of Health Sciences, Department of Physiotherapy and Rehabilitation, Gazi University, Ankara, Turkey; Faculty of Medicine, Department of Algology, Gazi University, Ankara, Turkey	Gulsen, C., PT, MSc, Faculty of Health Sciences, Department of Physiotherapy and Rehabilitation, Gazi University, Ankara, Turkey; Soke, F., PT, PhD, Faculty of Health Sciences, Department of Physiotherapy and Rehabilitation, Gazi University, Ankara, Turkey; Eldemir, K., PT, MSc, Faculty of Health Sciences, Department of Physiotherapy and Rehabilitation, Gazi University, Ankara, Turkey; Apaydin, Y…	This trial was designed to evaluate the effects of fully immersive virtual reality (IVR) treatment combined with exercise training in fibromyalgia patients. Twenty patients were randomized into exercise group (EG) or IVR combined with exercise group (Exercise+IVR). The EG had combined exercise training consisted of 30 minutes of aerobic training and 30 minutes of Pilates training and Exercise+IVR…	aerobic exercise; exercise; fibromyalgia; immersive virtual reality; pilates	Patient treatment; Quality control; Surveys; Exercise training; Functional capacity; Immersive virtual reality; Physical activity; Randomized controlled trial; Six-minute walks; Training and exercise; Visual analogue scale; Virtual reality	Article	Scopus
LIM Y.M., Kim S.-K., Yoo D.-H., Kim H.	Effects of assistive technology-based occupational therapy on community-dwelling people recovering from stroke	2020	Assistive Technology		https://www.scopus.com/inward/record.uri?eid=2-s2.0-85087710216&doi=10.1080%2f10400435.2020.1789900&partnerID=40&md5=408c7b1a772f59c4e2094c0a8d4b9fe7	Konyang University - Daejeon Medical Campus, Occupational Therapy, South Korea	LIM, Y.M., Konyang University - Daejeon Medical Campus, Occupational Therapy, South Korea; Kim, S.-K., Konyang University - Daejeon Medical Campus, Occupational Therapy, South Korea; Yoo, D.-H., Konyang University - Daejeon Medical Campus, Occupational Therapy, South Korea; Kim, H., Konyang University - Daejeon Medical Campus, Occupational Therapy, South Korea	Purpose: The purpose of this study was to investigate the effect of assistive technology-based occupational therapy on occupational performance, satisfaction, and psychosocial impacts of community-dwelling people recovering from stroke. Methods: A total of eleven community-dwelling people recovering from stroke participated in an occupational therapy intervention based on the core concepts of the…	Assistive technology devices; Occupational Performance; Psychosocial Impacts; Satisfaction; Stroke Recovery	Housing; Occupational therapy; Assistive technology; Assistive technology devices; Daily lives; Goal attainment; Human activities; Post interventions; Post test; User satisfaction; Recovery	Article	Scopus
Samčović A.	Accessibility of services in digital television for hearing impaired consumers	2020	Assistive Technology	1	https://www.scopus.com/inward/record.uri?eid=2-s2.0-85087630084&doi=10.1080%2f10400435.2020.1757786&partnerID=40&md5=e0d83b60770ba6c5665cdc4448357ca2	University of Belgrade - Faculty of Transport and Traffic Engineering, Belgrade, Serbia	Samčović, A., University of Belgrade - Faculty of Transport and Traffic Engineering, Belgrade, Serbia	This paper deals with the issue of the utilization of digital television for hearing impaired consumers. The necessity and different possibilities in providing of watching television services for people with the special needs have risen with the occurrence of digital television. Various access services, such as subtitles and sign language, are described in this paper. This preliminary study inclu…	deaf; digital television; ICT; integration; services; universal access	Digital television; Surveys; Access service; Focus groups; Hard of hearings; Hearing impaired; Hearing-impaired users; Sign language; Social exclusion; Special needs; Audition	Article	Scopus
Degerli Y.I., Dogu F., Oksuz C.	MANUFACTURING AN ASSISTIVE DEVICE WITH 3D PRINTING TECHNOLOGY- A CASE REPORT	2020	Assistive Technology		https://www.scopus.com/inward/record.uri?eid=2-s2.0-85087612822&doi=10.1080%2f10400435.2020.1791278&partnerID=40&md5=6e459dabf22482a539d6714a69c87340	Hacettepe UniversitesiAnkara 06532, Turkey; Gazi UniversitesiAnkara 06500, Turkey	Degerli, Y.I., Hacettepe UniversitesiAnkara 06532, Turkey; Dogu, F., Gazi UniversitesiAnkara 06500, Turkey; Oksuz, C., Hacettepe UniversitesiAnkara 06532, Turkey	[No abstract available]			Article	Scopus
Masselink C.E.	Trends in wheelchair recommendations in a dedicated seating department	2020	Assistive Technology		https://www.scopus.com/inward/record.uri?eid=2-s2.0-85087586866&doi=10.1080%2f10400435.2020.1772899&partnerID=40&md5=5a247b4c958d7790f5cff0a911c30906	Occupational Therapy Department, Western Michigan University, Kalamazoo, United States	Masselink, C.E., Occupational Therapy Department, Western Michigan University, Kalamazoo, United States	Introduction: In the early 2000 s, investigators at the federal government noted growing Medicare expenditures for power mobility devices, which were related to high profit margins and fraudulent activity. Medicare responded with policy and program changes, and stakeholders in wheelchair service delivery have noticed an impact on their services and changes in wheelchair user access to needed equi…	Policy and legislation; positioning and support services; seating; service delivery; wheeled mobility aids	Health insurance; Patient rehabilitation; Economic Recession; Federal governments; Manual wheelchair; Rehabilitation technology; Service delivery; Severe disabilities; Wheelchair seating; Wheelchair users; Wheelchairs	Article	Scopus
Deng L., Rattadilok P.	The need for and barriers to using assistive technologies among individuals with Autism Spectrum Disorders in China	2020	Assistive Technology		https://www.scopus.com/inward/record.uri?eid=2-s2.0-85085385468&doi=10.1080%2f10400435.2020.1757787&partnerID=40&md5=d0fcba7d8e2be2a5fa8c3851695ee9ac	School of Computer Science, University of Nottingham Ningbo China, Ningbo, China	Deng, L., School of Computer Science, University of Nottingham Ningbo China, Ningbo, China; Rattadilok, P., School of Computer Science, University of Nottingham Ningbo China, Ningbo, China	A large number of people in China have been affected by Autism Spectrum Disorders (ASDs). However, different factors associated with current barriers to accessing external support by ASD individuals in China have been identified. Assistive technologies are believed to help address the barriers. To obtain an in-depth understanding of the need and barriers of Chinese individuals with ASD in using a…	assistive technology; Autism Spectrum Disorders; barrier; need; stigma		Article	Scopus
MacIntosh A., Vignais N., Vigneron V., Fay L., Musielak A., Desailly E., Biddiss E.	The design and evaluation of electromyography and inertial biofeedback in hand motor therapy gaming	2020	Assistive Technology	1	https://www.scopus.com/inward/record.uri?eid=2-s2.0-85084134913&doi=10.1080%2f10400435.2020.1744770&partnerID=40&md5=8beafee7c5b0e4b455e6575429d5a6b4	CIAMS, Univ. Paris-Sud, Université Paris-Saclay, Orsay, France; Bloorview Research Institute, Holland Bloorview Kids Rehabilitation Hospital, Toronto, Canada; Institute of Biomaterials and Biomedical Engineering, University of Toronto, Toronto, Canada; CIAMS, Université d’Orléans, Orléans, France; IBISC EA 4526, Université d’Evry, Université Paris-Saclay, Evry, France; Fondation Ellen Poidatz, Sa…	MacIntosh, A., CIAMS, Univ. Paris-Sud, Université Paris-Saclay, Orsay, France, Bloorview Research Institute, Holland Bloorview Kids Rehabilitation Hospital, Toronto, Canada, Institute of Biomaterials and Biomedical Engineering, University of Toronto, Toronto, Canada; Vignais, N., CIAMS, Univ. Paris-Sud, Université Paris-Saclay, Orsay, France, CIAMS, Université d’Orléans, Orléans, France; Vigneron…	This article details the design of a co-created, evidence-based biofeedback therapy game addressing the research question: is the biofeedback implementation efficient, effective, and engaging for promoting quality movement during a therapy game focused on hand gestures? First, we engaged nine young people with Cerebral Palsy (CP) as design partners to co-create the biofeedback implementation. A c…	assessment; biofeedback; developmental disability; knowledge translation; neurorehabilitation and brain computer interfaces; pediatrics; recreation; usability	Biofeedback; Cerebral palsy; Design and evaluations; Design recommendations; Evidence-based; Inertial sensor; Knowledge-sharing; Research questions; User perspectives; Human computer interaction	Article	Scopus
Budrionis A., Plikynas D., Daniušis P., Indrulionis A.	Smartphone-based computer vision travelling aids for blind and visually impaired individuals: A systematic review	2020	Assistive Technology	1	https://www.scopus.com/inward/record.uri?eid=2-s2.0-85083679792&doi=10.1080%2f10400435.2020.1743381&partnerID=40&md5=8014faf7173d1c9d41e6bf19c55f6395	Department of Business Technologies and Entrepreneurship, Vilnius Gediminas Technical University, Vilnius, Lithuania; Norwegian Centre for E-health Research, University Hospital of North Norway, Tromsø, Norway	Budrionis, A., Department of Business Technologies and Entrepreneurship, Vilnius Gediminas Technical University, Vilnius, Lithuania, Norwegian Centre for E-health Research, University Hospital of North Norway, Tromsø, Norway; Plikynas, D., Department of Business Technologies and Entrepreneurship, Vilnius Gediminas Technical University, Vilnius, Lithuania; Daniušis, P., Department of Business Tech…	Given the growth in the numbers of visually impaired (VI) people in low-income countries, the development of affordable electronic travel aid (ETA) systems employing devices, sensors, and apps embedded in ordinary smartphones becomes a potentially cost-effective and reasonable all-in-one solution of utmost importance for the VI. This paper offers an overview of recent ETA research prototypes that…	computer vision techniques; electronic travel aid; object recognition; obstacle detection; smartphone device	Cost effectiveness; Deep neural networks; Embedded systems; Haptic interfaces; Indoor positioning systems; Interface states; Navigation; Smartphones; Vision aids; Blind and visually impaired; Electronic travel aidss; Low income countries; Navigation solution; Orientation and navigation; Outdoor environment; Research prototype; Scientific achievements; Computer vision	Review	Scopus
Yeoh W.L., Choi J., Loh P.Y., Saito S., Muraki S.	The effect of horizontal forces from a Smart Walker on gait and perceived exertion	2020	Assistive Technology		https://www.scopus.com/inward/record.uri?eid=2-s2.0-85083670306&doi=10.1080%2f10400435.2020.1744771&partnerID=40&md5=d7e4e37a0dcef22f98d1edeca08605b8	Graduate School of Design, Kyushu University, Fukuoka, Japan; Faculty of Design, Kyushu University, Fukuoka, Japan; Faculty of Computer Science and Systems Engineering, Okayama Prefectural University, Soja, Japan	Yeoh, W.L., Graduate School of Design, Kyushu University, Fukuoka, Japan; Choi, J., Graduate School of Design, Kyushu University, Fukuoka, Japan; Loh, P.Y., Faculty of Design, Kyushu University, Fukuoka, Japan; Saito, S., Faculty of Computer Science and Systems Engineering, Okayama Prefectural University, Soja, Japan; Muraki, S., Faculty of Design, Kyushu University, Fukuoka, Japan	Increasingly, electric motors are being incorporated into wheeled walkers to implement various smart features to better assist their users physically. These modified walkers, known as Smart Walkers, use their electric motors to generate horizontal forces that can be used to reduce the physical load for walking, prevent falls and provide navigation support. However, these forces can also alter gai…	assistive devices; horizontal force; robotic rollators	Electric motors; Different effects; Double support phase; Gait parameters; Horizontal forces; Navigation support; Perceived exertion; Ratings of perceived exertions (RPE); Resistive forces; Walking aids	Article	Scopus
Abreu D., Codina B., Toledo J., Suárez A.	Validation of an eBAT as a mobility aid for blind people	2020	Assistive Technology		https://www.scopus.com/inward/record.uri?eid=2-s2.0-85082824367&doi=10.1080%2f10400435.2020.1743380&partnerID=40&md5=aacb538f58687585ae4ca4edf5d91bcd	Computer Science and Systems Department, Universidad de La Laguna, La Laguna, Spain; Didactic and Educational Research Department, Universidad de La Laguna, La Laguna, Spain; Developmental Psychology and Education Department, Universidad de La Laguna, La Laguna, Spain	Abreu, D., Computer Science and Systems Department, Universidad de La Laguna, La Laguna, Spain; Codina, B., Didactic and Educational Research Department, Universidad de La Laguna, La Laguna, Spain; Toledo, J., Computer Science and Systems Department, Universidad de La Laguna, La Laguna, Spain; Suárez, A., Developmental Psychology and Education Department, Universidad de La Laguna, La Laguna, Spain	One of the challenges faced by blind persons to achieve optimal mobility is the detection and avoidance of obstacles located in their travel path. Besides the widely used white cane, alternative or complementary devices have been developed, such as electronic aids that provide feedback about the environment. However, the devices available have been unable to provide an optimal solution with wides…	electronic aids; obstacle detection and avoidance; ultrasonic; visual disability	Manufacture; Obstacle detectors; Ultrasonics; Detection and avoidances; Electronic aids; Manufacturing cost; Mobility aid for blind; Number of contacts; Obstacle detection; Optimal protection; Visual disability; Ultrasonic applications	Article	Scopus
Nahar L., Sulaiman R., Jaafar A.	An interactive math braille learning application to assist blind students in Bangladesh	2020	Assistive Technology		https://www.scopus.com/inward/record.uri?eid=2-s2.0-85082434636&doi=10.1080%2f10400435.2020.1734112&partnerID=40&md5=4cae98ef86bd4d54649b157998ef2dd2	Institute of Visual Informatics, Universiti Kebangsaan Malaysia, UKM Bangi, Malaysia	Nahar, L., Institute of Visual Informatics, Universiti Kebangsaan Malaysia, UKM Bangi, Malaysia; Sulaiman, R., Institute of Visual Informatics, Universiti Kebangsaan Malaysia, UKM Bangi, Malaysia; Jaafar, A., Institute of Visual Informatics, Universiti Kebangsaan Malaysia, UKM Bangi, Malaysia	Due to the lack of affordable assistive tools for learning mathematics, blind students in Bangladesh still use outdated learning tools like Tailor Frame. Therefore, demand for a low-cost technological tool is there that will help the blind students to learn math braille and calculate numbers more easily. To provide an effective and affordable assistive tool, this study begins with a needs assessm…	accessible technologies; blind students; braille; mathematics education	Audition; Students; Assistive applications; braille; Interaction methods; Interactive interfaces; Learning facilities; Learning Mathematics; Mathematical calculations; Mathematics education; Computer aided instruction	Article	Scopus
Turgeon P., Dubé M., Laliberté T., Archambault P.S., Flamand V.H., Routhier F., Campeau-Lecours A.	Mechanical design of a new device to assist eating in people with movement disorders	2020	Assistive Technology		https://www.scopus.com/inward/record.uri?eid=2-s2.0-85081721064&doi=10.1080%2f10400435.2020.1734111&partnerID=40&md5=4d5a656afddc0e30a7c31436a51a9780	Department of Mechanical Engineering, Université LavalQC, Canada; Centre for Interdisciplinary Research in Rehabilitation and Social Integration, CIUSSS De La Capitale-NationaleQC, Canada; Centre for Interdisciplinary Research in Rehabilitation of Greater Montreal, Centre Intégré De Santé Et De Services Sociaux De Laval, Laval, Canada; School of Physical and Occupational Therapy, McGill Universit…	Turgeon, P., Department of Mechanical Engineering, Université LavalQC, Canada, Centre for Interdisciplinary Research in Rehabilitation and Social Integration, CIUSSS De La Capitale-NationaleQC, Canada; Dubé, M., Department of Mechanical Engineering, Université LavalQC, Canada, Centre for Interdisciplinary Research in Rehabilitation and Social Integration, CIUSSS De La Capitale-NationaleQC, Canada…	Many people living with neurological disorders, such as cerebral palsy, stroke, muscular dystrophy or dystonia, experience upper limb impairments (muscle spasticity, loss of selective motor control, muscle weakness or tremors) and are unable to eat independently. This article presents the development of a new device to assist with eating, aimed at stabilizing the movement of people who have movem…	assistive robotics; assistive technology; eating assistance; rehabilitation engineering	Fluidity; Muscle; Assistive robotics; Assistive technology; eating assistance; Movement of peoples; Muscular dystrophy; Neurological disorders; Rehabilitation engineering; Task completion time; Diseases	Article	Scopus
Werner C., Dometios A.C., Tzafestas C.S., Maragos P., Bauer J.M., Hauer K.	Evaluating the task effectiveness and user satisfaction with different operation modes of an assistive bathing robot in older adults	2020	Assistive Technology	1	https://www.scopus.com/inward/record.uri?eid=2-s2.0-85079902011&doi=10.1080%2f10400435.2020.1755744&partnerID=40&md5=f0a19d117ef1db3d30e24e3c6d5eb96f	Center for Geriatric Medicine, Heidelberg University, Heidelberg, Germany; Agaplesion Bethanien Hospital Heidelberg, Geriatric Center at the Heidelberg University, Heidelberg, Germany; School of Electrical and Computer Engineering, National Technical University of Athens, Athens, Greece	Werner, C., Center for Geriatric Medicine, Heidelberg University, Heidelberg, Germany, Agaplesion Bethanien Hospital Heidelberg, Geriatric Center at the Heidelberg University, Heidelberg, Germany; Dometios, A.C., School of Electrical and Computer Engineering, National Technical University of Athens, Athens, Greece; Tzafestas, C.S., School of Electrical and Computer Engineering, National Technical…	Bathing robots have the potential to foster the independence of older adults who require assistance with bathing. Making human-robot interaction (HRI) for older persons as easy, effective, and user-satisfying as possible is, however, a major challenge in the development of such robots. The study aimed to evaluate the effectiveness (coverage, step effectiveness) and user satisfaction (After-Scenar…	Activities of daily living; aged; baths; human-robot interaction; robotics	Human rehabilitation equipment; Autonomous operations; Human robot Interaction (HRI); Potential users; Robot assistance; Robot autonomy; Shared control; Telemanipulation; User satisfaction; Human robot interaction	Article	Scopus
Sakamaki I., PhD, Adams K., PhD, Tavakoli M., PhD, Wiebe S., PhD	A feasibility study of eye gaze with biofeedback in a human-robot interface	2020	Assistive Technology		https://www.scopus.com/inward/record.uri?eid=2-s2.0-85079132703&doi=10.1080%2f10400435.2020.1719557&partnerID=40&md5=9fe579741e5a0d447a49830e698ade19	Faculty of Rehabilitation Medicine, University of Alberta, Edmonton, Canada; Department of Electrical and Computer Engineering, University of Alberta, Edmonton, Canada; Department of Psychology, University of Alberta, Edmonton, Canada	Sakamaki, I., PhD, Faculty of Rehabilitation Medicine, University of Alberta, Edmonton, Canada; Adams, K., PhD, Faculty of Rehabilitation Medicine, University of Alberta, Edmonton, Canada; Tavakoli, M., PhD, Department of Electrical and Computer Engineering, University of Alberta, Edmonton, Canada; Wiebe, S., PhD, Department of Psychology, University of Alberta, Edmonton, Canada	Play is a vital activity in which children learn skills and explore the environment through object manipulation. Assistive robots have been used to provide access to play, and Forbidden Region Virtual Fixture (FRVF) guidance at the user interface could help the users make the robot traverse the play environment more efficiently because it behaves like virtual walls to follow. Eye gaze was used to…	auditory feedback; eye gaze; gaze fixation; haptic user interface; people with disabilities; vibrotactile feedback; virtual fixture	Biofeedback; Fixtures (tooling); Haptic interfaces; Planning; Visual communication; Visual servoing; Auditory feedback; Eye-gaze; Haptic user interfaces; People with disabilities; Vibro-tactile feedbacks; Virtual fixture; Robots	Article	Scopus
Chu C.-H., Wang I.-J., Sun J.-R., Liu C.-H.	Customized designs of short thumb orthoses using 3D hand parametric models	2020	Assistive Technology	3	https://www.scopus.com/inward/record.uri?eid=2-s2.0-85078619442&doi=10.1080%2f10400435.2019.1709917&partnerID=40&md5=d42c4babcaa5e390ec3f788e90ce40b4	Department of Industrial Engineering and Management, National Tsing Hua University, Hsinchu, Taiwan; Department of Industrial Engineering and Enterprise Information, Tunghai University, Taichung, Taiwan; Department of Rehabilitation, Fu Jen Catholic University Hospital, Taipei, Taiwan; Department of Occupational Therapy, College of Medicine, Fu Jen Catholic University, Taipei, Taiwan	Chu, C.-H., Department of Industrial Engineering and Management, National Tsing Hua University, Hsinchu, Taiwan; Wang, I.-J., Department of Industrial Engineering and Enterprise Information, Tunghai University, Taichung, Taiwan; Sun, J.-R., Department of Rehabilitation, Fu Jen Catholic University Hospital, Taipei, Taiwan; Liu, C.-H., Department of Occupational Therapy, College of Medicine, Fu Jen…	This research achieved its purposes of producing a 3D hand parametric hand model in a functional position, using the 3D hand parametric model as a template to generate an individualized approximate 3D hand model, constructing a 3D printed short thumb orthosis with a seamless structural design and ductile materials based on the individualized approximate 3D hand model, and reporting a case study o…	3D printing; customized design; kriging; orthosis; parametric models	3D modeling; Anthropometry; Computer keyboards; End effectors; Orthotics; Reverse engineering; Structural design; 3-D printing; Anthropometric data; Assistive technology; Ductile materials; Kriging; Orthosis; Parametric modeling; Parametric models; 3D printers	Article	Scopus
Otoom M., Alzubaidi M.A., Aloufee R.	Novel navigation assistive device for deaf drivers	2020	Assistive Technology		https://www.scopus.com/inward/record.uri?eid=2-s2.0-85078609079&doi=10.1080%2f10400435.2020.1712499&partnerID=40&md5=6cf9bf383959e367012ef02acfde0948	Computer Engineering Department, Yarmouk University, Irbid, Jordan	Otoom, M., Computer Engineering Department, Yarmouk University, Irbid, Jordan; Alzubaidi, M.A., Computer Engineering Department, Yarmouk University, Irbid, Jordan; Aloufee, R., Computer Engineering Department, Yarmouk University, Irbid, Jordan	There are over 466 million people in the world with disabling hearing loss. People with severe-to-profound hearing impairment need to lipread or use sign language, even with hearing aids. Assistive Technologies play a vital role in helping these people interact efficiently with their environment. Deaf drivers are not currently able to take full advantage of voice-based navigation applications. In…	Assistive Technology; deaf drivers; real-time systems; speech recognition; vibrotactile stimulation; voice-based navigation systems	Audition; Classifiers; Hearing aids; Interactive computer systems; Navigation systems; Nearest neighbor search; Real time systems; Assistive devices; Assistive technology; GPS-based navigation; Hearing impairments; K-nearest neighbor classifier; Usability studies; Vibration pattern; Vibrotactile; Speech recognition	Article	Scopus
Setoguchi D., Kinoshita K., Kamada S., Sakamoto T., Kise N., Kotani N., Goto K., Shiota E., Inoue T., Yamamoto T.	Hybrid Assistive Limb improves restricted hip extension after total hip arthroplasty	2020	Assistive Technology		https://www.scopus.com/inward/record.uri?eid=2-s2.0-85078495340&doi=10.1080%2f10400435.2020.1712498&partnerID=40&md5=e8cf19ab2f4c1703037aafd6b97959e6	Department of Orthopaedic Surgery, Fukuoka University Faculty of Medicine, Fukuoka, Japan; Department of Rehabilitation Medicine, Fukuoka University Hospital, Fukuoka, Japan; Department of Neurosurgery, Fukuoka University Faculty of Medicine, Fukuoka, Japan	Setoguchi, D., Department of Orthopaedic Surgery, Fukuoka University Faculty of Medicine, Fukuoka, Japan; Kinoshita, K., Department of Orthopaedic Surgery, Fukuoka University Faculty of Medicine, Fukuoka, Japan; Kamada, S., Department of Rehabilitation Medicine, Fukuoka University Hospital, Fukuoka, Japan; Sakamoto, T., Department of Orthopaedic Surgery, Fukuoka University Faculty of Medicine, Fu…	The Hybrid Assistive Limb (HAL) was developed as an exoskeleton robot that supports gait training. The purpose of this study was to assess the usefulness of training using the HAL after total hip arthroplasty (THA). We targeted 16 consecutive patients who underwent THA via the posterior approach. We randomized patients to the HAL group (8 hips), in which the HAL was used as part of physical thera…	decreased peak hip extension angle; gait analysis; Hybrid Assistive Limb; total hip arthroplasty	Exoskeleton (Robotics); Gait analysis; Joints (anatomy); Orthopedics; Physical therapy; Anteroposterior; Control groups; decreased peak hip extension angle; Exoskeleton robots; Gait parameters; Hybrid assistive limbs; Range of motions; Total hip arthroplasty; Arthroplasty	Article	Scopus
Bontje P., Kruijne R., Pol M., Inoue K., Kobayashi R., Ito Y., Van Hartingsveldt M.	Developing an international research of health-care ICT applied for rehabilitation and daily living support between Japan and the Netherlands	2020	Assistive Technology		https://www.scopus.com/inward/record.uri?eid=2-s2.0-85078491002&doi=10.1080%2f10400435.2020.1716872&partnerID=40&md5=1a77864ff472529da5341a91d4e8df54	Graduate School of Health Sciences/Faculty of Health Sciences, Department of Occupational Therapy, Tokyo Metropolitan University, Tokyo, Japan; Department of Occupational Therapy, Amsterdam University of Applied Sciences, Amsterdam, Netherlands	Bontje, P., Graduate School of Health Sciences/Faculty of Health Sciences, Department of Occupational Therapy, Tokyo Metropolitan University, Tokyo, Japan; Kruijne, R., Department of Occupational Therapy, Amsterdam University of Applied Sciences, Amsterdam, Netherlands; Pol, M., Department of Occupational Therapy, Amsterdam University of Applied Sciences, Amsterdam, Netherlands; Inoue, K., Gradua…	While many health-care issues and technological solutions are viewed locally, developing new technological solutions might benefit from lessons learned globally. The aim of this study was to develop a shared international research agenda of health-care ICT, applied to rehabilitation and daily living support. This study was focused on sensor technology and social robots used for supporting older p…	Japan; nominal group technique; sensor technology; social robots; The Netherlands	Human rehabilitation equipment; Japan; Netherlands; Nominal group techniques; Sensor technologies; Social robots; Health care	Article	Scopus
Ehlers S.G., Field W.E.	Accessing and operating agricultural machinery: Advancements in assistive technology for users with impaired mobility	2019	Assistive Technology		https://www.scopus.com/inward/record.uri?eid=2-s2.0-85047160408&doi=10.1080%2f10400435.2018.1435591&partnerID=40&md5=beba2e8c4a426a9e13bfbdb454d66acc	Department of Agricultural and Biological Engineering, Purdue University, West Lafayette, IN, United States	Ehlers, S.G., Department of Agricultural and Biological Engineering, Purdue University, West Lafayette, IN, United States; Field, W.E., Department of Agricultural and Biological Engineering, Purdue University, West Lafayette, IN, United States	This research focused on the advancements made in enabling agricultural workers with impaired mobility to access and operate off-road agricultural machinery. Although not a new concept, technological advancements in remote-controlled lifts, electronic actuators, electric over hydraulic controllers, and various modes of hand controls have advanced significantly, allowing operators with limited mob…	accessibility; controls; disability; ergonomics; impairment; safety	Accident prevention; Agriculture; Control engineering; Ergonomics; Hydraulic actuators; Hydraulic machinery; Off road vehicles; Remote control; accessibility; Agricultural machine; Agricultural workers; Assistive technology; disability; Electronic actuators; impairment; Technological advancement; Tractors (agricultural); agriculture; device safety; devices; equipment design; ergonomics; human; se…	Review	Scopus
Perfect E., Jaiswal A., Davies T.C.	Systematic review: Investigating the effectiveness of assistive technology to enable internet access for individuals with deafblindness	2019	Assistive Technology	11	https://www.scopus.com/inward/record.uri?eid=2-s2.0-85047113446&doi=10.1080%2f10400435.2018.1445136&partnerID=40&md5=9765d9d446aa38e902bedce8fa959a47	Department of Mechanical and Materials Engineering, Queen’s University, Kingston, Canada; School of Rehabilitation Therapy, Queen's University, Kingston, Canada	Perfect, E., Department of Mechanical and Materials Engineering, Queen’s University, Kingston, Canada; Jaiswal, A., School of Rehabilitation Therapy, Queen's University, Kingston, Canada; Davies, T.C., Department of Mechanical and Materials Engineering, Queen’s University, Kingston, Canada	The purpose of this study is to systematically review published evidence regarding the development, use, and effectiveness of assistive devices and technol ogies that enable internet access for individuals who are deafblind. Eight electronic research databases (CINAHL, Embase, Engineering Village MEDLINE, PsycINFO, PubMed, Cochrane Library, and Web of Science) and three clinical trials registries…	auditory impairment; computer access; visual impairment	Digital libraries; Assistive devices; Assistive technology; auditory impairment; Computer access; Device development; Internet access technologies; Visual impairment; World Health Organization; Clinical research; classification; daily life activity; deafblindness; human; human relation; interpersonal communication; pathophysiology; self help device; Activities of Daily Living; Communication; Deaf…	Review	Scopus
Horstmann H., Krost E., Welke B., Kerling A., Hanke A., Jakubowitz E., Weber-Spickschen T.S.	The determination of the validity of an application-based knee-training device	2019	Assistive Technology		https://www.scopus.com/inward/record.uri?eid=2-s2.0-85045151551&doi=10.1080%2f10400435.2018.1441924&partnerID=40&md5=b8d4f27de7cea4744fefbf39046cb20d	Department of Orthopaedic Surgery, Hannover Medical School, Hannover, Germany; Institute of Sports Medicine and Trauma Department, Hannover Medical School, Hannover, Germany; Laboratory for Biomechanics and Biomaterials, Department of Orthopaedic Surgery, Hannover Medical School, Hannover, Germany	Horstmann, H., Department of Orthopaedic Surgery, Hannover Medical School, Hannover, Germany; Krost, E., Institute of Sports Medicine and Trauma Department, Hannover Medical School, Hannover, Germany; Welke, B., Laboratory for Biomechanics and Biomaterials, Department of Orthopaedic Surgery, Hannover Medical School, Hannover, Germany; Kerling, A., Institute of Sports Medicine and Trauma Departmen…	The goals of knee rehabilitation are to improve range of motion and muscle status. The aim of the study was to investigate accuracy and reproducibility of a newly designed knee-training device (KT) under standardized laboratory conditions. Two application-based software programs, one to measure maximum force and the other intended to improve users’ coordination were developed to be used on a tabl…	knee; rehabilitation; surgery; validation	Hydraulic equipment; Hydraulic machinery; Patient rehabilitation; Surgery; Testing; Bland-altman plots; Continuous measurements; knee; Laboratory conditions; Laboratory experiments; Reproducibilities; Servo-hydraulic system; validation; Application programs; article; clinical trial (topic); coordination; exercise; human; knee; machine; materials testing; reference value; reproducibility; software…	Article	Scopus
Khodadadi M., Baniasad M.A., Arazpour M., Farahmand F., Zohoor H.	Designing instrumented walker to measure upper-extremity’s efforts: A case study	2019	Assistive Technology	1	https://www.scopus.com/inward/record.uri?eid=2-s2.0-85044771577&doi=10.1080%2f10400435.2018.1442892&partnerID=40&md5=60a199c1fae07cc7ae044c6be93c5ec1	Department of Mechanical Engineering, Sharif University of Technology, Tehran, Iran; Department of Orthotics and Prosthetics, University of Social Welfare and Rehabilitation Sciences, Tehran, Iran	Khodadadi, M., Department of Mechanical Engineering, Sharif University of Technology, Tehran, Iran; Baniasad, M.A., Department of Mechanical Engineering, Sharif University of Technology, Tehran, Iran; Arazpour, M., Department of Orthotics and Prosthetics, University of Social Welfare and Rehabilitation Sciences, Tehran, Iran; Farahmand, F., Department of Mechanical Engineering, Sharif University …	The high prevalence of shoulder pain in using walkers in patients who have spinal cord injury (SCI). Also, the limited options available to economically measure grip forces in walkers, which drove the need to create one. This article describes a method to obtain upper-extremities’ forces and moments in a person with SCI by designing an appropriate instrumented walker. First, since the commercial …	force sensor; gait analysis; instrumented walker; rehabilitation; spinal cord injury; upper-extremities	Inverse problems; Patient rehabilitation; Flexion extension; Force sensor; Grip force; Inverse dynamics; Shoulder forces; Shoulder pain; Spinal cord injuries (SCI); Upper extremity; Gait analysis; adult; adverse device effect; case report; equipment design; gait; hand strength; human; joint; male; physiology; spinal cord injury; upper limb; walker; Adult; Equipment Design; Gait Analysis; Hand Str…	Article	Scopus
Sprigle S., Johnson Taylor S.	Data-mining analysis of the provision of mobility devices in the United States with emphasis on complex rehab technology	2019	Assistive Technology	3	https://www.scopus.com/inward/record.uri?eid=2-s2.0-85041011399&doi=10.1080%2f10400435.2017.1402391&partnerID=40&md5=e45c8a85f4f4b853b90f453c653ddd7a	Rehabilitation Engineering and Applied Research Lab, Georgia Institute of Technology, Atlanta, GA, United States; Numotion, Mt. Pleasant, NC, United States	Sprigle, S., Rehabilitation Engineering and Applied Research Lab, Georgia Institute of Technology, Atlanta, GA, United States; Johnson Taylor, S., Numotion, Mt. Pleasant, NC, United States	The objective of this study was to describe the provision of wheeled-mobility equipment from the perspective of a large equipment supplier in the United States. The records of clients who were prescribed a mobility device over a 6-month period were randomly sampled to product a dataset of 1,689 clients. Analysis was limited to descriptive statistics and measures of relationships. The majority of …	positioning and support surfaces; seating; service delivery; wheeled mobility aids	Public policy; Wheelchairs; Descriptive statistics; Large equipments; Manual wheelchair; Policy implications; seating; Service delivery; Support surfaces; Wheeled mobility; Data mining; adolescent; adult; classification; data mining; factual database; female; health care delivery; human; male; middle aged; retrospective study; United States; wheelchair; young adult; Adolescent; Adult; Data Mining…	Article	Scopus
Bedaf S., Marti P., De Witte L.	What are the preferred characteristics of a service robot for the elderly? A multi-country focus group study with older adults and caregivers	2019	Assistive Technology	3	https://www.scopus.com/inward/record.uri?eid=2-s2.0-85037711198&doi=10.1080%2f10400435.2017.1402390&partnerID=40&md5=8ecfad44fcc22c554093cd5989e71ee3	Research Centre Technology in Care, Zuyd University of Applied Sciences, Heerlen, Netherlands; School for Public Health and Primary Care (CAPHRI), Maastricht University, Maastricht, Netherlands; Department of Social Political Cognitive Science, University of Siena, Siena, Italy; Department of Industrial Design, Eindhoven University of Technology, Eindhoven, Netherlands	Bedaf, S., Research Centre Technology in Care, Zuyd University of Applied Sciences, Heerlen, Netherlands, School for Public Health and Primary Care (CAPHRI), Maastricht University, Maastricht, Netherlands; Marti, P., Department of Social Political Cognitive Science, University of Siena, Siena, Italy, Department of Industrial Design, Eindhoven University of Technology, Eindhoven, Netherlands; De W…	This multi-perspective study focuses on how a service robot for the elderly should behave when interacting with potential users. An existing service robot and a scenario were used as a concrete case, which was discussed and analyzed during focus group sessions with older adults (n = 38), informal caregivers (n = 24), and professional caregivers (n = 35) in the Netherlands, France, and the United …	activities of daily living; older adults; robotics	Human rehabilitation equipment; Robotics; Activities of Daily Living; Focus group studies; Informal caregivers; Multi-perspective; Older adults; Potential users; Social behavior; Task executions; Mobile robots; aged; caregiver; daily life activity; female; human; information processing; male; patient preference; robotics; self help device; Activities of Daily Living; Aged; Caregivers; Female; Foc…	Article	Scopus
Dukhovny E., Thistle J.J.	An exploration of motor learning concepts relevant to use of speech-generating devices	2019	Assistive Technology	1	https://www.scopus.com/inward/record.uri?eid=2-s2.0-85035338534&doi=10.1080%2f10400435.2017.1393845&partnerID=40&md5=3fcd7bfc0d9ac7efb21b2086dbf24c5f	Department of Communicative Sciences and Disorders, California State University, East Bay, Hayward, CA, United States; Department of Communication Sciences and Disorders, Western Washington University, Bellingham, WA, United States	Dukhovny, E., Department of Communicative Sciences and Disorders, California State University, East Bay, Hayward, CA, United States; Thistle, J.J., Department of Communication Sciences and Disorders, Western Washington University, Bellingham, WA, United States	For individuals who rely on speech-generating devices (SGDs) to complement and substitute for spoken language, speed, and accuracy of access to the device are paramount for effective communication. There is some evidence that application of motor memory principles may improve effectiveness of SGD-based communication. This article reviews motor learning models and principles, including learning st…	augmentative and alternative communication; developmental disability; electronic aids to daily living	Human rehabilitation engineering; Augmentative-and-alternative communication; Developmental disability; Dynamic displays; Effective communication; Electronic aids to daily livings; Environmental factors; Speech generating devices; Spoken languages; Speech communication	Article	Scopus
Hall A.K., Backonja U., Painter I., Cakmak M., Sung M., Lau T., Thompson H.J., Demiris G.	Acceptance and perceived usefulness of robots to assist with activities of daily living and healthcare tasks	2019	Assistive Technology	7	https://www.scopus.com/inward/record.uri?eid=2-s2.0-85035313571&doi=10.1080%2f10400435.2017.1396565&partnerID=40&md5=1f986d705e137024ab96f5c014c42b91	Department of Biomedical Informatics and Health Education, University of Washington School of Medicine, Seattle, WA, United States; Department of Health Services, School of Public Health, University of Washington, Seattle, WA, United States; Science and Engineering Department, University of Washington, Seattle, WA, United States; Department of Physics, University of Washington, Seattle, WA, Unite…	Hall, A.K., Department of Biomedical Informatics and Health Education, University of Washington School of Medicine, Seattle, WA, United States; Backonja, U., Department of Biomedical Informatics and Health Education, University of Washington School of Medicine, Seattle, WA, United States; Painter, I., Department of Health Services, School of Public Health, University of Washington, Seattle, WA, U…	As the number of older adults living with chronic conditions continues to rise, they will require assistance with activities of daily living (ADL) and healthcare tasks to continue living independently in their homes. One proposed solution to assist with the care needs of an aging population and a shrinking healthcare workforce is robotic technology. Using a cross-sectional survey design, we purpo…	activities of daily living; older adults; robotics	Health care; Robotics; Robots; Surveys; Activities of Daily Living; Aging population; Chronic conditions; Cross-sectional surveys; Older adults; Perceived usefulness; Personal care; Robotic technologies; Machine design; adult; cleaning; daily life activity; female; human; human tissue; major clinical study; male; middle aged; robotics; sadness; vital sign; adolescent; aged; cross-sectional study;…	Article	Scopus
Pahisa-Solé J., Herrera-Joancomartí J.	Testing an AAC system that transforms pictograms into natural language with persons with cerebral palsy	2019	Assistive Technology		https://www.scopus.com/inward/record.uri?eid=2-s2.0-85035147059&doi=10.1080%2f10400435.2017.1393844&partnerID=40&md5=fcf4497e146416cf2670ca953b9cba59	Department of Information and Communications Engineering, Autonomous University of Barcelona, Bellaterra, Spain	Pahisa-Solé, J., Department of Information and Communications Engineering, Autonomous University of Barcelona, Bellaterra, Spain; Herrera-Joancomartí, J., Department of Information and Communications Engineering, Autonomous University of Barcelona, Bellaterra, Spain	In this article, we describe a compansion system that transforms the telegraphic language that comes from the use of pictogram-based augmentative and alternative communication (AAC) into natural language. The system was tested with four participants with severe cerebral palsy and ranging degrees of linguistic competence and intellectual disabilities. Participants had used pictogram-based AAC at l…	augmentative and alternative communication; communication; information technology and telecommunications	Communication; Compandor circuits; Diseases; Linguistics; Augmentative-and-alternative communication; Communication device; Communication rate; Intellectual disability; Learning curves; Linguistic competences; Natural languages; Quantitative result; Human rehabilitation engineering	Article	Scopus
Eckert M., López M., Lázaro C., Meneses J.	MoKey: A versatile exergame creator for everyday usage	2019	Assistive Technology	1	https://www.scopus.com/inward/record.uri?eid=2-s2.0-85012119655&doi=10.1080%2f10400435.2017.1406016&partnerID=40&md5=720fa5d0df11547222d38334bbc0109e	Research Center on Software Technologies and Multimedia Systems for Sustainability (CITSEM), Universidad Politécnica de Madrid, Madrid, Spain	Eckert, M., Research Center on Software Technologies and Multimedia Systems for Sustainability (CITSEM), Universidad Politécnica de Madrid, Madrid, Spain; López, M., Research Center on Software Technologies and Multimedia Systems for Sustainability (CITSEM), Universidad Politécnica de Madrid, Madrid, Spain; Lázaro, C., Research Center on Software Technologies and Multimedia Systems for Sustainabi…	Currently, virtual applications for physical exercises are highly appreciated as rehabilitation instruments. This article presents a middleware called “MoKey” (Motion Keyboard), which converts standard off-the-shelf software into exergames (exercise games). A configurable set of gestures, captured by a motion capture camera, is translated into the key strokes required by the chosen software. The …	activities of daily living; computer access; electronic aids to daily living; neuromuscular impairment; older adults; rare degenerative diseases; universal design; usability	Human rehabilitation equipment; Activities of Daily Living; Computer access; Degenerative disease; Electronic aids to daily livings; Neuromuscular impairments; Older adults; Universal Design; usability; Middleware; adolescent; adult; child; computer assisted therapy; daily life activity; female; human; kinesiotherapy; male; middle aged; preschool child; procedures; self help device; task performa…	Article	Scopus
Choi Y.-H., Kim J.-D., Lee J.-H., Cha Y.-J.	Walking and balance ability gain from two types of gait intervention in adult patients with chronic hemiplegic stroke: A pilot study	2019	Assistive Technology	1	https://www.scopus.com/inward/record.uri?eid=2-s2.0-85033673287&doi=10.1080%2f10400435.2017.1387616&partnerID=40&md5=feb75d1d29a1d17126b26abf1dab0bc0	Department of Physical Therapy, Graduate School of Daejeon University, Daejeon City, South Korea; Rehabilitation Center, Bonifacio Hospital, Daejeon City, South Korea; Department of Emergency Medical Technology, College of Health and Medical Science, Daejeon University, Daejeon City, South Korea; Department of Physical Therapy, College of Health and Medical Science, Daejeon University, Daejeon Ci…	Choi, Y.-H., Department of Physical Therapy, Graduate School of Daejeon University, Daejeon City, South Korea; Kim, J.-D., Rehabilitation Center, Bonifacio Hospital, Daejeon City, South Korea; Lee, J.-H., Department of Emergency Medical Technology, College of Health and Medical Science, Daejeon University, Daejeon City, South Korea; Cha, Y.-J., Department of Physical Therapy, College of Health an…	This study examined whether the walking and balance ability of adult patients with chronic hemiplegic stroke are associated differentially with the degree of gain after two types of gait intervention. Twenty-four subjects with hemiplegic stroke were enrolled in this randomized study. Each subject participated in one of two gait intervention strategies: gait training with auditory feedback caused …	auditory feedback; gait intervention; hemiplegic stroke	Feedback; Auditory feedback; Center of pressure; Effective approaches; Experimental groups; gait intervention; hemiplegic stroke; Intervention strategy; Walking trainings; Patient treatment; aged; body equilibrium; controlled study; female; hemiplegia; human; kinesiotherapy; male; middle aged; physiology; procedures; randomized controlled trial; sensory feedback; stroke rehabilitation; walking; A…	Article	Scopus
Hoffman N., Sterkenburg P.S., Van Rensburg E.	The effect of technology assisted therapy for intellectually and visually impaired adults suffering from separation anxiety: Conquering the fear	2019	Assistive Technology	3	https://www.scopus.com/inward/record.uri?eid=2-s2.0-85032815095&doi=10.1080%2f10400435.2017.1371813&partnerID=40&md5=818f5af0bbcfc8a3bc039ab597f6ff3f	Department of Psychiatry and Mental Health, University of Cape Town, Observatory, Cape Town, South Africa; Department of Clinical Child and Family Studies and Amsterdam Public Health Research Institute (APH), Faculty of Behavior and Movement Sciences, Amsterdam, Netherlands; Bartiméus, AB Doorn, Netherlands; School of Psychosocial Behavioral Sciences, North-West University, Potchefstroom Campus, …	Hoffman, N., Department of Psychiatry and Mental Health, University of Cape Town, Observatory, Cape Town, South Africa; Sterkenburg, P.S., Department of Clinical Child and Family Studies and Amsterdam Public Health Research Institute (APH), Faculty of Behavior and Movement Sciences, Amsterdam, Netherlands, Bartiméus, AB Doorn, Netherlands; Van Rensburg, E., School of Psychosocial Behavioral Scien…	Persons with an intellectual disability (ID) are at risk of developing separation anxiety (SA) and, if left untreated, this can be a risk factor for the development of psychopathology. The effects of an intervention, namely technology assisted therapy for SA (TTSA), were examined on the SA, challenging behavior, psychosocial functioning, and quality of life (QOL) experienced by moderate to mild i…	cognitive impairment; communication; developmental disability; psychosocial functioning; quality of life; separation anxiety; technology; visual impairment	Communication; Ophthalmology; Cognitive impairment; Developmental disability; psychosocial functioning; Quality of life; Visual impairment; Separation; adult; female; human; intellectual impairment; interpersonal communication; male; middle aged; mobile application; psychology; quality of life; rehabilitation; self help device; separation anxiety; social competence; visually impaired person; Adul…	Article	Scopus
Raveh E., Schwartz I., Karniel N., Portnoy S.	Evaluation of the effectiveness of a novel gait trainer in increasing the functionality of individuals with motor impairment: A case series	2019	Assistive Technology	1	https://www.scopus.com/inward/record.uri?eid=2-s2.0-85032037902&doi=10.1080%2f10400435.2017.1382021&partnerID=40&md5=40bca9eff1f118233516941987373108	Occupational Therapy Department, Sackler Faculty of Medicine, Tel Aviv University, Tel Aviv, Israel; Physical Medicine and Rehabilitation Department, Hadassah Medical Center, Jerusalem, Israel	Raveh, E., Occupational Therapy Department, Sackler Faculty of Medicine, Tel Aviv University, Tel Aviv, Israel; Schwartz, I., Physical Medicine and Rehabilitation Department, Hadassah Medical Center, Jerusalem, Israel; Karniel, N., Physical Medicine and Rehabilitation Department, Hadassah Medical Center, Jerusalem, Israel; Portnoy, S., Occupational Therapy Department, Sackler Faculty of Medicine,…	Regaining the ability to independently ambulate following a physical disability can increase functional ability and participation of patients in daily life. Gait trainers are assistive devices that enable body support and provide safety during gait. However, most conventional gait trainers are pre-configured to a constant position, therefore not suitable for practicing sit-to-stand function, and …	fall; gait analysis; gait symmetry	Safety engineering; fall; Functional abilities; Gait symmetries; Motor impairments; Physical activity levels; Physical disability; Positive experiences; Spatiotemporal parameters; Gait analysis; adult; aged; equipment design; falling; female; gait; human; male; middle aged; motor dysfunction; physiology; prevention and control; self help device; walker; Accidental Falls; Adult; Aged; Equipment De…	Article	Scopus
Wong S., Mortenson B., Sawatzky B.	Starting and stopping kinetics of a rear mounted power assist for manual wheelchairs	2019	Assistive Technology	1	https://www.scopus.com/inward/record.uri?eid=2-s2.0-85031113737&doi=10.1080%2f10400435.2017.1366373&partnerID=40&md5=747b4e7d2e7103f168c5349dd83562ae	Faculty of Medicine, University of British Columbia, Vancouver, BC, Canada; International Collaboration on Repair Discoveries (ICORD), University of British Columbia Faculty of Medicine, and Vancouver Coastal Health (VCH) Research Institute, Vancouver, BC, Canada; Rehabilitation Research Program, VCH Research Institute, Vancouver, BC, Canada; Department of Occupational Science & Occupational Ther…	Wong, S., Faculty of Medicine, University of British Columbia, Vancouver, BC, Canada; Mortenson, B., International Collaboration on Repair Discoveries (ICORD), University of British Columbia Faculty of Medicine, and Vancouver Coastal Health (VCH) Research Institute, Vancouver, BC, Canada, Rehabilitation Research Program, VCH Research Institute, Vancouver, BC, Canada, Department of Occupational Sc…	A rear mounted, powered, drive wheel has been developed to assist with mobility for manual wheelchairs. The version tested operates in two modes (indoor and outdoor). To start in the indoor mode users must initiate propulsion with sufficient force to trigger the motor. To stop users must apply a braking force through the handrims. The objectives of this study were to compare (1) the minimum force…	mobility; usability; wheeled mobility aids	Carrier mobility; Sporting goods; Braking force; Manual wheelchair; Outcome measures; Stopping distance; Stopping force; usability; Wheelchair users; Wheeled mobility; Wheelchairs; adolescent; adult; crossover procedure; equipment design; female; human; kinetics; male; middle aged; wheelchair; young adult; Adolescent; Adult; Cross-Over Studies; Equipment Design; Female; Humans; Kinetics; Male; Mi…	Article	Scopus
Larsson Ranada Å., Lidström H.	Satisfaction with assistive technology device in relation to the service delivery process—A systematic review	2019	Assistive Technology	11	https://www.scopus.com/inward/record.uri?eid=2-s2.0-85031098684&doi=10.1080%2f10400435.2017.1367737&partnerID=40&md5=fd9d4444b9d1b4cf81d884ca6ee15dd4	Department of Social and Welfare Studies, Linköping University, Norrköping, Sweden	Larsson Ranada, Å., Department of Social and Welfare Studies, Linköping University, Norrköping, Sweden; Lidström, H., Department of Social and Welfare Studies, Linköping University, Norrköping, Sweden	The service delivery process (SDP) of assistive technology devices (ATDs) is attracting interest, as the provision of ATDs is critical for the independence and participation in society of individuals with disabilities. The purpose of the current study was to investigate what impact the SDP has on satisfaction with ATDs in individuals with disabilities in relation to everyday activities. A systema…	assistive devices; participation; prescription; self-help devices	Assistive devices; Assistive technology devices; participation; prescription; self-help devices; Service-delivery process; Systematic literature review; Systematic Review; Human rehabilitation equipment; disabled person; health care delivery; human; human activities; organization and management; patient participation; patient satisfaction; rehabilitation; self help device; Delivery of Health Care…	Review	Scopus
Widehammar C., Lidström H., Hermansson L.	Environmental barriers to participation and facilitators for use of three types of assistive technology devices	2019	Assistive Technology	4	https://www.scopus.com/inward/record.uri?eid=2-s2.0-85029455687&doi=10.1080%2f10400435.2017.1363828&partnerID=40&md5=7b70b6b1073966b11198ed39d0c9c630	Department of Pediatrics, Örebro University, Örebro, Sweden; University Health Care Research Center, Örebro University, Örebro, Sweden; Department of Social and Welfare Studies, Linköping University, Linköping, Sweden; Department of Prosthetics and Orthotics, Örebro University, Örebro, Sweden	Widehammar, C., Department of Pediatrics, Örebro University, Örebro, Sweden, University Health Care Research Center, Örebro University, Örebro, Sweden; Lidström, H., Department of Social and Welfare Studies, Linköping University, Linköping, Sweden; Hermansson, L., University Health Care Research Center, Örebro University, Örebro, Sweden, Department of Prosthetics and Orthotics, Örebro University,…	The aim was to compare the presence of environmental barriers to participation and facilitators for assistive technology (AT) use and study the relation between barriers and AT use in three different AT devices. A cross-sectional survey was conducted. Inclusion criteria were ≥one year of experience as a user of myoelectric prosthesis (MEP), powered mobility device (PMD), or assistive technology f…	Electronic aids to daily living; information technology and telecommunications; prosthetics; service delivery; wheelchair transportation; wheeled mobility aids	Myoelectrically controlled prosthetics; Prosthetics; Surveys; Assistive technology devices; Cross-sectional surveys; Electronic aids to daily livings; Myoelectric prosthesis; Service delivery; Training and education; Wheelchair transportation; Wheeled mobility; Environmental technology; adult; aged; cross-sectional study; daily life activity; disabled person; environmental planning; female; human…	Article	Scopus
Caña-Pino A., Apolo-Arenas M.D., Moral-Blanco J., De la Cruz-Sánchez E., Espejo-Antúnez L.	A novel determination of energy expenditure efficiency during a balance task using accelerometers. A pilot study	2019	Assistive Technology		https://www.scopus.com/inward/record.uri?eid=2-s2.0-85029423887&doi=10.1080%2f10400435.2017.1358775&partnerID=40&md5=98e055ff8e2b2ded79d15a6527d97e7b	Medical Surgical-Therapy Department, Universidad de Extremadura Facultad de Medicina, Badajoz, Spain; Departamento de Teoría de la Señal e Ingeniería Telemática, Valladolid University, Valladolid, Spain; Department of Physical Activity and Sport, Murcia University, Murcia, Spain	Caña-Pino, A., Medical Surgical-Therapy Department, Universidad de Extremadura Facultad de Medicina, Badajoz, Spain; Apolo-Arenas, M.D., Medical Surgical-Therapy Department, Universidad de Extremadura Facultad de Medicina, Badajoz, Spain; Moral-Blanco, J., Departamento de Teoría de la Señal e Ingeniería Telemática, Valladolid University, Valladolid, Spain; De la Cruz-Sánchez, E., Department of Ph…	The objectives of this study are to determine the displacement of the center of pressure (CoP) and its association with the spectral energy density of the acceleration required for the maintenance of postural balance in different standing positions in healthy participants using design observational and setting laboratorial studies. Participants were 30 healthy university students aged between 18 …	Accelerometer; center of pressures; postural sway; rehabilitation; risk of falls	Patient rehabilitation; Spectral density; Anterior posteriors; Center of pressure; Energy spectral density; Postural sway; Spectral energy density; Statistically significant difference; Triaxial accelerometer; University students; Accelerometers; accelerometry; adolescent; adult; body equilibrium; body mass; body position; energy metabolism; falling; female; human; male; physiology; pilot study; …	Article	Scopus
Sprigle S., Huang M., Misch J.	Measurement of rolling resistance and scrub torque of manual wheelchair drive wheels and casters	2019	Assistive Technology	1	https://www.scopus.com/inward/record.uri?eid=2-s2.0-85077844253&doi=10.1080%2f10400435.2019.1697907&partnerID=40&md5=3f06f3ff843328603e358b2d75cde27a	Rehabilitation Engineering and Applied Research Lab, Georgia Institute of Technology, Atlanta, GA, United States	Sprigle, S., Rehabilitation Engineering and Applied Research Lab, Georgia Institute of Technology, Atlanta, GA, United States; Huang, M., Rehabilitation Engineering and Applied Research Lab, Georgia Institute of Technology, Atlanta, GA, United States; Misch, J., Rehabilitation Engineering and Applied Research Lab, Georgia Institute of Technology, Atlanta, GA, United States	The effort needed to maneuver a manual wheelchair is a function of the occupied wheelchair’s inertia and energy loss. The primary source of energy loss is due to the resistance of the drive wheels and casters on the ground. Specifically, manual wheelchairs have two major sources of frictional energy loss: rolling resistance and scrub torque. The objective of this study was to develop and validate…	casters; energy loss; manual wheelchairs; rolling resistance; scrub torque; wheels	Energy dissipation; Rolling resistance; Torque; Wheels; Applied loads; casters; Complex relationships; Component levels; Frictional energies; Loss properties; Manual wheelchair; Primary sources; Wheelchairs	Article	Scopus
Sun H., Wilson J., Roach M.J., Hefzy M.S., Nemunaitis G.	Demonstration of pressure reduction in a new proof of concept spine board	2019	Assistive Technology		https://www.scopus.com/inward/record.uri?eid=2-s2.0-85076468231&doi=10.1080%2f10400435.2019.1658658&partnerID=40&md5=2a79a08bd7b28e865caeb8e209b0e7ed	Case Western Reserve University School of Medicine, Cleveland, OH, United States; MetroHealth Rehabilitation Institute, ClevelandOH, United States; Center for Health Research and Policy, Cleveland, OH, United States; Department of Physical Medicine and Rehabilitation, Veterans Affairs Northeast Ohio Healthcare System, Cleveland, OH, United States; Department of Mechanical, Industrial and Manufact…	Sun, H., Case Western Reserve University School of Medicine, Cleveland, OH, United States; Wilson, J., Case Western Reserve University School of Medicine, Cleveland, OH, United States, Department of Physical Medicine and Rehabilitation, Veterans Affairs Northeast Ohio Healthcare System, Cleveland, OH, United States; Roach, M.J., Case Western Reserve University School of Medicine, Cleveland, OH, U…	Pressure injuries are a significant problem following spinal cord injury (SCI). High interface pressures while lying on a spine board during emergency transport appear to play a major role in their formation. The aim of the present study was to assess the interface pressures and sensing area between the body and the standard spine board (SSB) and a proof of concept spine board prototype (P-5). Tw…	pressure injury; spinal cord injury; spine board; support surface	Patient rehabilitation; Emergency transports; Interface pressure; Pair-wise comparison; Pressure reduction; Repeated measures; Spinal cord injuries (SCI); spine board; Support surfaces; Mercury compounds	Article	Scopus
Campos L.C.B., MSc, Caro C.C., PhD, Fachin-Martins E., PhD, Cruz D.M.C.D., PhD	Cross-cultural adaptation and reliability of the Brazilian version of the wheelchair skills test-questionnaire 4.3 for manual wheelchair users	2019	Assistive Technology	1	https://www.scopus.com/inward/record.uri?eid=2-s2.0-85076389989&doi=10.1080%2f10400435.2019.1697906&partnerID=40&md5=9a9c5339370e90adc0c1014c517ae001	Department of Occupational Therapy, Universidade Federal de São Carlos (UFSCar), São Carlos, Brazil; Program in Science of Rehabilitation, Universidade de Brasília, Distrito Federal, Brazil	Campos, L.C.B., MSc, Department of Occupational Therapy, Universidade Federal de São Carlos (UFSCar), São Carlos, Brazil; Caro, C.C., PhD, Department of Occupational Therapy, Universidade Federal de São Carlos (UFSCar), São Carlos, Brazil; Fachin-Martins, E., PhD, Program in Science of Rehabilitation, Universidade de Brasília, Distrito Federal, Brazil; Cruz, D.M.C.D., PhD, Department of Occupatio…	The Wheelchair Skills Test-Questionnaire form for Manual Wheelchairs Operated by Wheelchair Users (WSTQ-M-WCU 4.3) assesses wheelchair skills that may influence users’ occupational performance in their daily activities. The purpose of this study was to cross-culturally adapt the WSTQ-M-WCU 4.3 to Brazilian Portuguese and to examine the inter-rater and test-retest reliabilities. This is a methodol…	assessment; outcomes; wheeled mobility aids	Reliability; Semantics; Surveys; assessment; Cross-cultural adaptation; Evidence-based practices; Inter-rater reliabilities; outcomes; Psychometric properties; Test-retest reliability; Wheeled mobility; Wheelchairs	Article	Scopus
Park J.M., Jung H.S.	A study on the effects of modified wheelchair skills program (WSP) for hemiplegic clients	2019	Assistive Technology		https://www.scopus.com/inward/record.uri?eid=2-s2.0-85075622298&doi=10.1080%2f10400435.2019.1678534&partnerID=40&md5=5d0c2ac8ef4082e4d799a760781d9179	Occupational Therapy, Chunnam Techno University, Gokseong-gun, South Korea; Occupational Therapy, Dongshin University, Naju, South Korea	Park, J.M., Occupational Therapy, Chunnam Techno University, Gokseong-gun, South Korea; Jung, H.S., Occupational Therapy, Dongshin University, Naju, South Korea	The purpose of this study was to evaluate the modified WSP for improving wheelchair skills capacity, perceived satisfaction and performance in daily activities for hemiplegia patients in Korea. The modified WSP was tailored to better fit the environment and the treatment needs of hemiplegic patients in Korea. The resulting training procedure was augmented to help hemiplegic patients understand th…	hemiplegia; training; wheelchairs	Patient treatment; Personnel training; Basic mechanics; Daily activity; Experimental groups; hemiplegia; Hemiplegia patient; Hemiplegic patients; Opinion surveys; Training procedures; Wheelchairs	Article	Scopus
Kearns W.D., Becker A.J., Condon J.P., Molinari V., Hanson A., Conover W., Fozard J.L.	Views of wheelchair users and caregivers regarding a passive safety monitoring system for electric powered wheelchair operators with cognitive impairment	2019	Assistive Technology		https://www.scopus.com/inward/record.uri?eid=2-s2.0-85075347217&doi=10.1080%2f10400435.2019.1689537&partnerID=40&md5=6ca7d47ed8893770f95197a51f1ead38	College of Behavioral and Community Sciences, University of South Florida, Tampa, FL, United States; Innovative Design Labs, Inc, Minneapolis, MN, United States; Shimberg Health Sciences Library, University of South Florida, Tampa, FL, United States; College of Engineering, University of South Florida, Tampa, FL, United States	Kearns, W.D., College of Behavioral and Community Sciences, University of South Florida, Tampa, FL, United States; Becker, A.J., Innovative Design Labs, Inc, Minneapolis, MN, United States; Condon, J.P., Innovative Design Labs, Inc, Minneapolis, MN, United States; Molinari, V., College of Behavioral and Community Sciences, University of South Florida, Tampa, FL, United States; Hanson, A., Shimber…	The opinions of cognitively intact current wheelchair users and their professional caregivers were solicited to explore acceptability of the concept of a passive electric wheelchair-mounted movement monitor to track driving safety and cognitive impairment. Two focus groups of electric wheelchair users (N = 9), and two focus groups of staff caregivers (N = 8) were conducted at a congregate care fa…	assistive technology design; dementia; electric powered wheelchair; fractal dimension	Commerce; Fractal dimension; Monitoring; Assistive technology; Cognitive impairment; dementia; Electric powered wheelchairs; Electric wheelchair; Institutional setting; Movement monitor; Wheelchair users; Wheelchairs	Article	Scopus
Özsungur F.	A research on the effects of successful aging on the acceptance and use of technology of the elderly	2019	Assistive Technology		https://www.scopus.com/inward/record.uri?eid=2-s2.0-85075120223&doi=10.1080%2f10400435.2019.1691085&partnerID=40&md5=527829c9ffe95a3e070cd4593d4c14ba	International Trade and Finance, Adana Science and Technology University, Adana, Turkey	Özsungur, F., International Trade and Finance, Adana Science and Technology University, Adana, Turkey	The aim of the study is to analyze the effects of successful aging on technology acceptance and use behaviors, via developing a model. This study was conducted with 687 participants in five Retirement Rest Homes in Turkey. A model was developed to meet the study’s research objectives using the scales of successful aging and the second unified theory of acceptance and use of technology. A path ana…	gerontechnology acceptance; mobile internet; successful aging; technology acceptance of the elderly	Least squares approximations; Motivation; Regression analysis; Gerontechnology; Mobile Internet; Partial least square (PLS); Structural equation modeling; Successful aging; Technology acceptance; Technology acceptance model; Unified theory of acceptance and use of technology; Economic and social effects; aged; aging; article; expectancy; female; human; human experiment; Internet; major clinical s…	Article	Scopus
Martiniello N., Eisenbarth W., Lehane C., Johnson A., Wittich W.	Exploring the use of smartphones and tablets among people with visual impairments: Are mainstream devices replacing the use of traditional visual aids?	2019	Assistive Technology	3	https://www.scopus.com/inward/record.uri?eid=2-s2.0-85075022812&doi=10.1080%2f10400435.2019.1682084&partnerID=40&md5=e0fd6ff833ea899df1f53aeaaf18f3af	School of Optometry, University of Montreal, Montreal, QC, Canada; Research Services, CRIR/Centre de réadaptation MAB-Mackay du CIUSSS du Centre-Ouest-de-l’Île-de-Montréal, Montreal, QC, Canada; Zentrums für angewandte Sehforschung, Munich University of Applied Sciences, Munich, Germany; Department of Public Health, University of Copenhagen, Copenhagen, Denmark; Department of Psychology, Concordi…	Martiniello, N., School of Optometry, University of Montreal, Montreal, QC, Canada, Research Services, CRIR/Centre de réadaptation MAB-Mackay du CIUSSS du Centre-Ouest-de-l’Île-de-Montréal, Montreal, QC, Canada; Eisenbarth, W., Zentrums für angewandte Sehforschung, Munich University of Applied Sciences, Munich, Germany; Lehane, C., Department of Public Health, University of Copenhagen, Copenhagen…	Smartphones and tablets incorporate built-in accessibility features, but little is known about their impact within the visually impaired population. This study explored the use of smartphones and tablets, the degree to which they replace traditional visual aids, and factors influencing these decisions. Data were collected through an anonymous online survey targeted toward visually impaired partic…	computer access; information technology and telecommunications; universal design; usability; visual impairment	Data visualization; Optical character recognition; Surveys; Computer access; Object identification; Specific tasks; Traditional devices; Universal Design; usability; Visual impairment; Visually impaired; Smartphones	Article	Scopus
Al-Zboon E.	Assistive technologies as a curriculum component in Jordan: Future special education teachers’ preparation and the field status	2019	Assistive Technology		https://www.scopus.com/inward/record.uri?eid=2-s2.0-85074597882&doi=10.1080%2f10400435.2019.1677804&partnerID=40&md5=e1d0798ae2bb7f36badb96f32147593e	Special Education Department, Queen Rania Faulty for Childhood, Hashemite University, Zarqa, Jordan	Al-Zboon, E., Special Education Department, Queen Rania Faulty for Childhood, Hashemite University, Zarqa, Jordan	The purpose of this study was to provide evidence-based information about future special education teachers’ perceptions of their preparation for using assistive technology (AT), and the field status with respect to the use of AT. Content analysis was conducted in order to analyze the data from 15 semi-structured interviews and a focus group consisting of 8 participants. The results indicate that…	assistive technologies; curriculum for students with disabilities; field status; special education teachers; teacher preparation	Decision making; Assistive technology; Content analysis; Ethical considerations; field status; Research communities; Semi structured interviews; Special education; Teacher preparation; Curricula	Article	Scopus
Tai K.-C.	Containers that enable blind people to determine the level of contained hot water	2019	Assistive Technology		https://www.scopus.com/inward/record.uri?eid=2-s2.0-85074491228&doi=10.1080%2f10400435.2019.1682085&partnerID=40&md5=707ca949bdf7e228ce763f7469d8dcc7	Department of Computer Aided Media Design, Chang Jung Christian University, Tainan, Taiwan	Tai, K.-C., Department of Computer Aided Media Design, Chang Jung Christian University, Tainan, Taiwan	To determine the water level in a container, people who are blind use electronic aids or the sound and weight of poured water. In this work, three non-powered containers were designed to assist blind people in detecting the level of hot water in a container. Their effectiveness was evaluated and compared with that of an unaugmented control container. The capacities of the designed containers and …	blind; container design; water level	Water levels; Average errors; blind; Blind people; Container design; Electronic aids; Hot water; Related variables; Containers	Article	Scopus
Lussier-Dalpé B., Houtekier C., Duquette J., Wanet-Defalque M.-C., Wittich W.	The challenge of reading music notation for pianists with low vision: An exploratory qualitative study using a head-mounted display	2019	Assistive Technology		https://www.scopus.com/inward/record.uri?eid=2-s2.0-85074320998&doi=10.1080%2f10400435.2019.1661315&partnerID=40&md5=07d24bc084965cbd359d2958688f2e62	CRIR Research Services–Institut Nazareth et Louis-Braille du CISSS de la Montérégie-Centre, Longueuil, QC, Canada; School of Optometry, Université de Montréal, Montréal, QC, Canada; CRIR Research Services–Centre de réadaptation Lethbridge-Layton Mackay du CIUSSS du Centre-Ouest-de-l’Île-de-Montréal, Montréal, QC, Canada	Lussier-Dalpé, B., CRIR Research Services–Institut Nazareth et Louis-Braille du CISSS de la Montérégie-Centre, Longueuil, QC, Canada; Houtekier, C., CRIR Research Services–Institut Nazareth et Louis-Braille du CISSS de la Montérégie-Centre, Longueuil, QC, Canada; Duquette, J., CRIR Research Services–Institut Nazareth et Louis-Braille du CISSS de la Montérégie-Centre, Longueuil, QC, Canada; Wanet-…	Reading musical notation while interpreting it on a musical instrument poses problems for musicians with a visual impairment (VI). This study sought to describe the visual aids, adaptations and compensatory strategies used by five amateur pianists with low vision when reading music, to identify the problems they face when using these aids, and to verify whether a head-mounted display (HMD) such a…	assistive technology; electronic aids to daily living; low vision; magnification; music; recreation; visual impairment	Electronic musical instruments; Ophthalmology; Vision aids; Assistive technology; Electronic aids to daily livings; Low vision; magnification; music; recreation; Visual impairment; Helmet mounted displays	Article	Scopus
Gosselin L.R., Arthanat S.	Reliability and validity of the usability scale for assistive technology for computer access: a preliminary study using video-based evaluation	2019	Assistive Technology		https://www.scopus.com/inward/record.uri?eid=2-s2.0-85074031551&doi=10.1080%2f10400435.2019.1661316&partnerID=40&md5=c5a9616a5ab7b0e23cf4ae83555b74d7	Department of Occupational Therapy, University of New Hampshire, Durham, NH, United States	Gosselin, L.R., Department of Occupational Therapy, University of New Hampshire, Durham, NH, United States; Arthanat, S., Department of Occupational Therapy, University of New Hampshire, Durham, NH, United States	Objective: The focus of this research was to establish the interrater reliability and content validity of the Usability Scale for Assistive Technology-Computer Access (USAT-CA), an evaluation tool to facilitate selection of computer access AT devices for individuals with disabilities. Methods: AT providers used the USAT-CA to evaluate two clients with physical disabilities interacting with their …	computer access; education; employment; information technology and telecommunications; service delivery	Education; Employment; Speech recognition; Assistive technology; Computer access; Inter-rater reliabilities; Intraclass correlation coefficients; Reliability and validity; Service delivery; Speech recognition softwares; Video-based evaluations; Reliability	Article	Scopus
Lahav O., Kittany J., Levy S.T., Furst M.	Perception of sonified representations of complex systems by people who are blind	2019	Assistive Technology		https://www.scopus.com/inward/record.uri?eid=2-s2.0-85074005348&doi=10.1080%2f10400435.2019.1666930&partnerID=40&md5=92a06a413aa1bf9fe7a0b2cd8f773101	Department of Mathematics, Science and Technology Education, Constantiner School of Education, Tel Aviv University, Israel; Faculty of Education, University of Haifa, Haifa, Mount Carmel, Israel; Faculty of Engineering, Tel Aviv University, Tel Aviv, Israel	Lahav, O., Department of Mathematics, Science and Technology Education, Constantiner School of Education, Tel Aviv University, Israel; Kittany, J., Department of Mathematics, Science and Technology Education, Constantiner School of Education, Tel Aviv University, Israel; Levy, S.T., Faculty of Education, University of Haifa, Haifa, Mount Carmel, Israel; Furst, M., Faculty of Engineering, Tel Aviv…	This research focused on examining the sonification properties that can lead people who are blind to distinguish and to identify different sounds. This research included 10 participants, all of whom were examined individually. They listened to a sonified scenario, which was generated by an agent-based NetLogo computer model of a gas particle in a container. The participants identified the differe…	accessibility; assistive technology; auditory perception; blind; education; rehabilitation	Audition; Education; Patient rehabilitation; accessibility; Assistive technology; Auditory perception; blind; Complexity levels; Computer modeling; Learning environments; Program developers; Computer aided instruction	Article	Scopus
Sonenblum S.E., Maurer C.L., Hanes C.D., Piriano J., Sprigle S.H.	Everyday use of power adjustable seat height (PASH) systems	2019	Assistive Technology	3	https://www.scopus.com/inward/record.uri?eid=2-s2.0-85071462574&doi=10.1080%2f10400435.2019.1634659&partnerID=40&md5=065787a471eafa973c60049cc5be5cca	Rehabilitation Engineering and Applied Research Laboratory, The George W. Woodruff School of Mechanical Engineering, Georgia Institute of Technology, Atlanta, GA, United States; Shepherd Center, Atlanta, GA, United States; Quantum Rehab, Duryea, PA, United States; Rehabilitation Engineering and Applied Research Laboratory, College of Design and The George W. Woodruff School of Mechanical Engineer…	Sonenblum, S.E., Rehabilitation Engineering and Applied Research Laboratory, The George W. Woodruff School of Mechanical Engineering, Georgia Institute of Technology, Atlanta, GA, United States; Maurer, C.L., Shepherd Center, Atlanta, GA, United States; Hanes, C.D., Rehabilitation Engineering and Applied Research Laboratory, The George W. Woodruff School of Mechanical Engineering, Georgia Institu…	The objective of this study was to measure how, why, and where the power adjustable seat height (PASH) system of Quantum’s iLevel® wheelchairs were used. We instrumented iLevel® power wheelchairs for 24 adults to measure wheelchair occupancy, seat height, in-seat activity level, and bouts of mobility. Participants elevated their wheelchair 3.9 (4.4) (mean (SD)) times per day, including 1.0 (1.6) …	ecological momentary assessment; elevate; monitoring; reach; transfer; wheelchair	Human rehabilitation equipment; Monitoring; Activity levels; ecological momentary assessment; elevate; Power wheelchair; reach; Seat heights; System use; transfer; Wheelchairs	Article	Scopus
Wallcook S., Nygård L., Kottorp A., Malinowsky C.	The use of everyday information communication technologies in the lives of older adults living with and without dementia in Sweden	2019	Assistive Technology	7	https://www.scopus.com/inward/record.uri?eid=2-s2.0-85071036866&doi=10.1080%2f10400435.2019.1644685&partnerID=40&md5=75aab3ce0c84eb492208a827bf50b6f6	Division of Occupational Therapy, Department of Neurobiology, Care Sciences and Society, Karolinska Institutet, Huddinge, Sweden; Faculty of Health and Society, Malmö University, Malmö, Sweden	Wallcook, S., Division of Occupational Therapy, Department of Neurobiology, Care Sciences and Society, Karolinska Institutet, Huddinge, Sweden; Nygård, L., Division of Occupational Therapy, Department of Neurobiology, Care Sciences and Society, Karolinska Institutet, Huddinge, Sweden; Kottorp, A., Division of Occupational Therapy, Department of Neurobiology, Care Sciences and Society, Karolinska …	Background: Increasingly services and interventions involve everyday information communication technologies (EICTs) in provision, however, use of EICTs among people with dementia is little known. Therefore, this study aimed to investigate the relevance, use, and ability to use EICTs between a group of older adults with dementia and a comparison group with no known cognitive impairment. Method: In…	activities of daily living; cognitive impairment; information technology and telecommunications; older adults	Surveys; Activities of Daily Living; Cognitive impairment; Comparison group; Correlation analysis; Descriptive statistics; Information communication technology; Older adults; Technology use; Neurodegenerative diseases	Article	Scopus
Hedman G., MS, Mehta J., PhD., Lavender S., PhD., Reichelt P., PhD., Conrad K., PhD., Park S., PhD.	Consumer opinion of stair descent devices used during emergency evacuation from high-rise buildings	2019	Assistive Technology		https://www.scopus.com/inward/record.uri?eid=2-s2.0-85070467311&doi=10.1080%2f10400435.2019.1634656&partnerID=40&md5=4c40a192f87101a838d9ecb0406fc48a	Disability & Human Development, University of Illinois at Chicago, Chicago, IL, United States; Integrated Systems Engineering, The Ohio State University, Columbus, OH, United States; Department of Orthopedics, The Ohio State University, Columbus, OH, United States; School of Public Health, University of Illinois at Chicago, Chicago, IL, United States	Hedman, G., MS, Disability & Human Development, University of Illinois at Chicago, Chicago, IL, United States; Mehta, J., PhD., Integrated Systems Engineering, The Ohio State University, Columbus, OH, United States; Lavender, S., PhD., Integrated Systems Engineering, The Ohio State University, Columbus, OH, United States, Department of Orthopedics, The Ohio State University, Columbus, OH, United …	The use of stair descent devices is an important part of a comprehensive emergency evacuation plan. To date, there is little research on consumer opinion of these devices. A pilot study was performed at a local center for independent living, enabling 14 consumers with mobility impairments to state their initial impressions of 14 devices, representing three general designs: carry-type, track-type,…	disability; emergency evacuation; stair descent devices	Tall buildings; Design features; disability; Emergency evacuation; General designs; High rise building; Independent living; Pilot studies; Stair descent; Stairs	Article	Scopus
Lebrasseur A., B.Erg, Lettre J., PEng, PhD, Routhier F., OT, PhD, Bouffard J., PEng, PhD, PMP, Archambault P.S., OT, MSc, Campeau-Lecours A., OT, PhD	Evaluation of the usability of an actively actuated arm support	2019	Assistive Technology	1	https://www.scopus.com/inward/record.uri?eid=2-s2.0-85068805784&doi=10.1080%2f10400435.2019.1629124&partnerID=40&md5=9ca0a4b4bb313c0a5b81ccc38b4b1872	Centre for Interdisciplinary Research in Rehabilitation and Social Integration, Centre intégré universitaire de santé et de services sociaux de la Capitale-Nationale, Institut de réadaptation en déficience physique de Québec, Quebec City, QC, Canada; Department of Rehabilitation, Université Laval, Quebec City, QC, Canada; Interdisciplinary Research Center in Rehabilitation, Centre intégré de sant…	Lebrasseur, A., B.Erg, Centre for Interdisciplinary Research in Rehabilitation and Social Integration, Centre intégré universitaire de santé et de services sociaux de la Capitale-Nationale, Institut de réadaptation en déficience physique de Québec, Quebec City, QC, Canada, Department of Rehabilitation, Université Laval, Quebec City, QC, Canada; Lettre, J., PEng, PhD, Centre for Interdisciplinary …	Dynamic arm supports can be used to increase the autonomy of people with upper limb disabilities, but their usability is often poorly documented. The objective of this study is to evaluate the usability of an actuated arm support (AAS), namely the Gowing power-assisted arm support. Nine participants with neurological disorders restricting their upper limb capacities (DASH = 63.51 ± 7.72) complete…	actively actuated device; assistive devices; power-assisted arm support; rehabilitation	Human rehabilitation equipment; Patient rehabilitation; actively actuated device; Arm support; Assistive devices; Assistive technology; Daily living activities; Neurological disorders; People with upper limb disabilities; Semi structured interviews; Atomic absorption spectrometry	Article	Scopus
Restrepo P., BME, Velásquez J., MScEng, Múnera S., MRScT, Quintero Valencia C.A., MSPH	Adapting ride-on toy cars as a tool to promote leisure: A feasibility study in Colombia	2019	Assistive Technology		https://www.scopus.com/inward/record.uri?eid=2-s2.0-85067677926&doi=10.1080%2f10400435.2019.1611675&partnerID=40&md5=0868f01d1d8f0d35efe548eb66175c9e	Biomedical Engineering, Universidad EIA, Envigado, Antioquia, Colombia; Assistive Technology, El Comité de Rehabilitación, Medellín, Antioquia, Colombia; Medical Subdivision, El Comité de Rehabilitación, Medellín, Antioquia, Colombia	Restrepo, P., BME, Biomedical Engineering, Universidad EIA, Envigado, Antioquia, Colombia; Velásquez, J., MScEng, Biomedical Engineering, Universidad EIA, Envigado, Antioquia, Colombia; Múnera, S., MRScT, Assistive Technology, El Comité de Rehabilitación, Medellín, Antioquia, Colombia; Quintero Valencia, C.A., MSPH, Medical Subdivision, El Comité de Rehabilitación, Medellín, Antioquia, Colombia	Go Baby Go is a program at the University of Delaware that adapts ride-on toy cars for the recreation of children with disabilities. Colombia’s health-care system faces many challenges in delivering early mobility devices to these children; thus, here (in Colombia), no dedicated programs such as Go Baby Go exist. In this study, we examined how feasible it would be to implement a Go Baby Go progra…	adaptation; disability; leisure; low-cost assistive technologies; ride-on toy car	adaptation; Assistive technology; Children with cerebral palsies; Children with disabilities; disability; Inclusion and exclusions; leisure; Recreational activities; Human rehabilitation equipment	Article	Scopus
Guard A., MS, OTR/L, Konz M., MS, OTR/L, Smith R.O., PhD, OT, FAOTA, RESNA Fellow, Engel J.M., PhD, OT, FAOTA, Keating T., PhD	The development of an iPad application for the pain assessment of individuals with developmental disabilities and complex communication needs	2019	Assistive Technology		https://www.scopus.com/inward/record.uri?eid=2-s2.0-85067670092&doi=10.1080%2f10400435.2019.1612797&partnerID=40&md5=4d008034e1d26530ba645b57cd555df2	Occupational Therapy, University of Wisconsin-Milwaukee, Milwaukee, WI, United States; Occupational Therapy, University of Wisconsin-Milwaukee, Oshkosh, WI, United States; University of Wisconsin-Milwaukee, Milwaukee, WI, United States; Cognitopia, Eugene, OR, United States	Guard, A., MS, OTR/L, Occupational Therapy, University of Wisconsin-Milwaukee, Milwaukee, WI, United States; Konz, M., MS, OTR/L, Occupational Therapy, University of Wisconsin-Milwaukee, Oshkosh, WI, United States; Smith, R.O., PhD, OT, FAOTA, RESNA Fellow, University of Wisconsin-Milwaukee, Milwaukee, WI, United States; Engel, J.M., PhD, OT, FAOTA, University of Wisconsin-Milwaukee, Milwaukee, W…	Aims: Develop a new pain assessment for youth with communication challenges. The Guard-Putzer Pain Assessment Domains (gPAD) mobile application (app) was designed and tested as a universally accessible way for youth, ages 7–12 years, with a developmental disability (DD) to express their pain experiences through self-report. Methods: A two-phase process developed the design for an app, created an …	assessment; communication; developmental disability; information technology and telecommunications; outcomes; pediatrics	Communication; Pediatrics; User interfaces; assessment; Complex communication needs; Developmental disability; iPad applications; Mobile applications; outcomes; Potential population; Two-phase process; Health	Article	Scopus
Lopez R.M., MASc, Pinder S.D., PhD, Davies T.C., PhD	Matuto, Magbasa, Maglaro: Learning to read braille through play	2019	Assistive Technology	1	https://www.scopus.com/inward/record.uri?eid=2-s2.0-85067575672&doi=10.1080%2f10400435.2019.1619633&partnerID=40&md5=508b2c917d07204deafc4e72eef82827	BDAT Lab, Department of Mechanical and Materials Engineering, Queen’s University, Kingston, ON, Canada; Department of Physics, Engineering Physics, and Astronomy, Queen’s University, Kingston, ON, Canada	Lopez, R.M., MASc, BDAT Lab, Department of Mechanical and Materials Engineering, Queen’s University, Kingston, ON, Canada; Pinder, S.D., PhD, Department of Physics, Engineering Physics, and Astronomy, Queen’s University, Kingston, ON, Canada; Davies, T.C., PhD, BDAT Lab, Department of Mechanical and Materials Engineering, Queen’s University, Kingston, ON, Canada	In September 2016, Digital Learning for Development and All Children Reading released a “Grand Challenge for Development” urging researchers to explore the barriers that children with sensory disabilities in the Philippines face with respect to learning how to read. We sought to address one component of this challenge; engagement of persons with visual impairment in learning how to read in braill…	co-design; communication; education; electronic aids to daily living; universal design; usability; visual impairment	Communication; Education; Ophthalmology; Surveys; Co-designs; Electronic aids to daily livings; Universal Design; usability; Visual impairment; E-learning	Article	Scopus
Burdea G., Kim N., Polistico K., Kadaru A., Grampurohit N., Roll D., Damiani F.	Assistive game controller for artificial intelligence-enhanced telerehabilitation post-stroke	2019	Assistive Technology	4	https://www.scopus.com/inward/record.uri?eid=2-s2.0-85067548089&doi=10.1080%2f10400435.2019.1593260&partnerID=40&md5=8ad06ee8d434759e735845b813a640e5	Bright Cloud International Corp, Center for Commercialization of Innovative Technologies, North Brunswick, NJ, United States; Patient Care Services, Roosevelt Care Center, Edison, NJ, United States	Burdea, G., Bright Cloud International Corp, Center for Commercialization of Innovative Technologies, North Brunswick, NJ, United States; Kim, N., Bright Cloud International Corp, Center for Commercialization of Innovative Technologies, North Brunswick, NJ, United States; Polistico, K., Bright Cloud International Corp, Center for Commercialization of Innovative Technologies, North Brunswick, NJ, …	Off-the-shelf gaming technology is designed for young, fit, and motor intact individuals. Artificial intelligence (AI) has a role in making controllers and therapeutic games adaptable to the disabled. Post-stroke rehabilitation outcomes can be enhanced by gaming technology within the home to enable engaging telerehabilitation. BrightBrainer™ Grasp (BBG) is a novel therapeutic game controller desi…	artificial intelligence; BrightBrainer; BrightBrainer Grasp; stroke; telerehabilitation; therapeutic games; usability evaluation	Artificial intelligence; Human rehabilitation engineering; BrightBrainer; BrightBrainer Grasp; stroke; Telerehabilitation; therapeutic games; Usability evaluation; Controllers	Article	Scopus
Valenti A.P., MS, Chita-Tegmark M., PhD, Tickle-Degnen L., PhD, OTR/L, FAOTA, Bock A.W., BS, Scheutz M.J., PhD	Using topic modeling to infer the emotional state of people living with Parkinson’s disease	2019	Assistive Technology	3	https://www.scopus.com/inward/record.uri?eid=2-s2.0-85067504710&doi=10.1080%2f10400435.2019.1623342&partnerID=40&md5=87b78e781548b5eacf4066016d6c1cfb	Tufts University Human-Robot Interaction Laboratory, Medford, MA, United States	Valenti, A.P., MS, Tufts University Human-Robot Interaction Laboratory, Medford, MA, United States; Chita-Tegmark, M., PhD, Tufts University Human-Robot Interaction Laboratory, Medford, MA, United States; Tickle-Degnen, L., PhD, OTR/L, FAOTA, Tufts University Human-Robot Interaction Laboratory, Medford, MA, United States; Bock, A.W., BS, Tufts University Human-Robot Interaction Laboratory, Medfor…	Individuals with Parkinson’s disease (PD) often exhibit facial masking (hypomimia), which causes reduced facial expressiveness. This can make it difﬁcult for those who interact with the person to correctly read their emotional state and can lead to problematic social and therapeutic interactions. In this article, we develop a probabilistic model for an assistive device, which can automatically in…	emotional state; latent dirichlet allocation; LIWC; Parkinson’s disease; topic modelling	Machine learning; Sentiment analysis; Emotional state; Facial Expressions; Facial expressiveness; Latent Dirichlet allocation; Latent dirichlet allocations; LIWC; Performance analysis; Probabilistic modeling; Statistics	Article	Scopus
Múnera S., MS, Pearlman J., PhD, Toro M., PhD, Worobey L., PhD, Boninger M., MD, Cooper R.A., PhD	Development and efficacy of an online wheelchair maintenance training program for wheelchair personnel	2019	Assistive Technology	3	https://www.scopus.com/inward/record.uri?eid=2-s2.0-85067494502&doi=10.1080%2f10400435.2019.1619632&partnerID=40&md5=b4e3d186290a8af3d2d0f51641a1fcd0	El Comité de Rehabilitación, Medellín, Colombia; Department of Rehabilitation Science and Technology, University of Pittsburgh, Pittsburgh, PA, United States; School of Physical Therapy, Universidad CES, Medellín, Colombia; Department of Physical Medicine & Rehabilitation, University of Pittsburgh, Pittsburgh, PA, United States; Human Engineering Research Laboratories, VA Pittsburgh Healthcare Sy…	Múnera, S., MS, El Comité de Rehabilitación, Medellín, Colombia; Pearlman, J., PhD, Department of Rehabilitation Science and Technology, University of Pittsburgh, Pittsburgh, PA, United States; Toro, M., PhD, School of Physical Therapy, Universidad CES, Medellín, Colombia; Worobey, L., PhD, Department of Physical Medicine & Rehabilitation, University of Pittsburgh, Pittsburgh, PA, United States; …	Objectives: To develop an online version of the wheelchair maintenance training program (WMTP) and compare learning outcomes from the in-person and online programs using the wheelchair maintenance training questionnaire (WMT-Q), administered before and after the intervention. Design: Iterative development of an online version of the WMTP and implementation. Setting: Online. Participants: 26 gradu…	education; knowledge translation; mobility; wheeled mobility aids	Carrier mobility; Curricula; Education; Maintenance; Personnel training; Students; Surveys; Websites; Wheelchairs; Iterative development; Knowledge translation; Multiple choice questions; Online training program; Open-ended questions; Statistical differences; Undergraduate students; Wheeled mobility; E-learning	Article	Scopus
Nix J., Schein R.M., Clayback D., Brienza D.M., Schmeler M.R.	An exploratory study analyzing demographics and opinions of assistive technology professionals within the complex rehab technology industry	2019	Assistive Technology		https://www.scopus.com/inward/record.uri?eid=2-s2.0-85067420324&doi=10.1080%2f10400435.2019.1619634&partnerID=40&md5=5c4b9f9f585a1bb8eeebe41b13723c79	Numotion, Brentwood, TN, United States; Department of Rehabilitation Science and Technology, University of Pittsburgh, Pittsburgh, PA, United States; National Coalition for Assistive & Rehab Technology, East Amherst, NY, United States	Nix, J., Numotion, Brentwood, TN, United States; Schein, R.M., Department of Rehabilitation Science and Technology, University of Pittsburgh, Pittsburgh, PA, United States; Clayback, D., National Coalition for Assistive & Rehab Technology, East Amherst, NY, United States; Brienza, D.M., Department of Rehabilitation Science and Technology, University of Pittsburgh, Pittsburgh, PA, United States; S…	This exploratory study investigated the demographics of Assistive Technology Professionals (ATPs) regarding their age, education, certifications, ethnicity, gender, veteran status, disability status, method of financial compensation, company type, and category. In addition, it analyzed opinions on the Complex Rehab Technology (CRT) industry regarding education level and licensure. An 18-question …	emerging trends; employment; service delivery	Employment; Population statistics; Assistive technology; Emerging trends; Exploratory studies; Financial compensation; Minority groups; Service delivery; Technology industry; University of Pittsburgh; Engineering education	Article	Scopus
Oyesanya T.O., PhD, RN, Thompson N., MPH, Arulselvam K., MPH, Seel R.T., PhD, FACRM	Technology and TBI: Perspectives of persons with TBI and their family caregivers on technology solutions to address health, wellness, and safety concerns	2019	Assistive Technology	4	https://www.scopus.com/inward/record.uri?eid=2-s2.0-85066132712&doi=10.1080%2f10400435.2019.1612798&partnerID=40&md5=e0ff29d69685613b4cf4c9648bf1681d	Duke University School of Nursing, Durham, NC, United States; Shepherd Center, Crawford Research Institute, Atlanta, GA, United States; Department of Physical Medicine and Rehabilitation, Virginia Commonwealth University, School of Medicine, Richmond, VA, United States	Oyesanya, T.O., PhD, RN, Duke University School of Nursing, Durham, NC, United States, Shepherd Center, Crawford Research Institute, Atlanta, GA, United States, Department of Physical Medicine and Rehabilitation, Virginia Commonwealth University, School of Medicine, Richmond, VA, United States; Thompson, N., MPH, Duke University School of Nursing, Durham, NC, United States, Shepherd Center, Crawf…	Assistive technologies that are tailored to individuals’ health, wellness, and safety concerns can help people with traumatic brain injury (TBI) and their family caregivers meet their goals. The purpose of this study was to investigate views of technology in the context of managing one’s everyday life from the perspectives of persons with TBI and their family caregivers. We conducted 27 in-person…	assistive technology; family caregiver; health; person; safety; traumatic brain injury; wellness	Accident prevention; Brain; Health; Patient rehabilitation; Patient treatment; Assistive technology; family caregiver; person; Traumatic Brain Injuries; wellness; Virtual addresses	Article	Scopus
Webber J., Wuschke J., Sawatzky B., Mortenson W.B.	Evaluating common approaches to improve visibility of wheelchair users	2019	Assistive Technology	1	https://www.scopus.com/inward/record.uri?eid=2-s2.0-85066129990&doi=10.1080%2f10400435.2019.1608478&partnerID=40&md5=16f30b42b18f8bc235d773ba31158868	Department of Occupational Sciences and Occupational Therapy, University of British Columbia, Vancouver, Canada; International Collaboration on Repair Discoveries (ICORD), Vancouver, Canada; Rehabilitation Research Program, VCH Institute, Vancouver, Canada; Department of Orthopaedics, University of British Columbia, Vancouver, Canada	Webber, J., Department of Occupational Sciences and Occupational Therapy, University of British Columbia, Vancouver, Canada; Wuschke, J., Department of Occupational Sciences and Occupational Therapy, University of British Columbia, Vancouver, Canada; Sawatzky, B., International Collaboration on Repair Discoveries (ICORD), Vancouver, Canada, Rehabilitation Research Program, VCH Institute, Vancouve…	Introduction: Wheelchair users deploy a variety of strategies to increase their visibility to motorists. Unfortunately, there is no empirical evidence supporting the use of any of these visibility strategies with this population. Objectives: To investigate the effectiveness of four different visibility strategies (i.e., light emitting diode (LED) lighting system, reflective safety vest, orange fl…	driving; mobility; usability; wheeled mobility aids	Automobile drivers; Carrier mobility; Citrus fruits; Light emitting diodes; Lighting fixtures; Wheelchairs; driving; LED lighting system; Lighting systems; Stopping distance; usability; Wheelchair users; Wheeled mobility; Visibility	Article	Scopus
Moral-Munoz J.A., PhD, Zhang W., PhD, Cobo M.J., PhD, Herrera-Viedma E., PhD, Kaber D.B., PhD	Smartphone-based systems for physical rehabilitation applications: A systematic review	2019	Assistive Technology	4	https://www.scopus.com/inward/record.uri?eid=2-s2.0-85066129711&doi=10.1080%2f10400435.2019.1611676&partnerID=40&md5=a3488f47f7c9e9ef44cffb6b3c702ec8	Dept. of Nursing and Physiotherapy, University of Cadiz, Cadiz, Spain; Institute of Research and Innovation in Biomedical Sciences of the Province of Cadiz (INiBICA), University of Cádiz, Cádiz, Spain; Dept. of Industrial & Systems Engineering, North Carolina State University, Raleigh, NC, United States; Dept. of Computer Science and Engineering, University of Cadiz, Cadiz, Spain; Dept. of Comput…	Moral-Munoz, J.A., PhD, Dept. of Nursing and Physiotherapy, University of Cadiz, Cadiz, Spain, Institute of Research and Innovation in Biomedical Sciences of the Province of Cadiz (INiBICA), University of Cádiz, Cádiz, Spain; Zhang, W., PhD, Dept. of Industrial & Systems Engineering, North Carolina State University, Raleigh, NC, United States; Cobo, M.J., PhD, Dept. of Computer Science and Engine…	Tele-(remote) rehabilitation is attracting increased attention from society, including the research community and commercial marketplace with an estimated global market value of $160 billion. Meanwhile, mobile device-based healthcare (“mHealth”) has appeared as a revolutionary approach to tele-rehabilitation practice. This paper presents a systematic review of the literature on smartphone-based s…	physical therapy; smartphone; tele-rehabilitation	International trade; mHealth; Physical therapy; Commercial marketplace; Design recommendations; Medical conditions; Physical rehabilitation; Progress managements; Rehabilitation System; Research communities; Telerehabilitation; Smartphones	Review	Scopus
Heinemann A.W., PhD, ABPP, FACRM, Fatone S., PhD, BPO, LaVela S.L., PhD, MPH, MBA, Slater B.C.S., MA, Deutsch A., RN, PhD, CRRN, Peterson M., DPT, Soltys N.T., CP, McPherson V., CPO	Orthotists’ and physical therapists’ perspectives on quality of care indicators for persons with custom ankle-foot orthoses	2019	Assistive Technology	1	https://www.scopus.com/inward/record.uri?eid=2-s2.0-85065971278&doi=10.1080%2f10400435.2019.1610814&partnerID=40&md5=743a3fe1f5d05c6bb03a7422310957ba	Department of Physical Medicine and Rehabilitation, Northwestern University, Chicago, IL, United States; Center for Rehabilitation Outcomes Research, The Shirley Ryan Ability Lab, Chicago, IL, United States; Prosthetics-Orthotics Center, Northwestern University, Chicago, IL, United States; Department of Veterans Affairs, Center of Innovation for Complex Chronic Healthcare (CINCCH), Health Service…	Heinemann, A.W., PhD, ABPP, FACRM, Department of Physical Medicine and Rehabilitation, Northwestern University, Chicago, IL, United States, Center for Rehabilitation Outcomes Research, The Shirley Ryan Ability Lab, Chicago, IL, United States; Fatone, S., PhD, BPO, Department of Physical Medicine and Rehabilitation, Northwestern University, Chicago, IL, United States, Prosthetics-Orthotics Center,…	Purpose: To describe the priorities of orthotists and physical therapists about quality measurement themes, and the feasibility and utility of collecting data from persons using custom AFOs that could inform quality measure development. Materials and Methods: Online survey assessed respondents’ perspectives and experiences. An Advisory Committee representing professional, organizational, and accr…	assessment; orthotics; outcomes; policy and legislation	Data acquisition; Orthotics; Physical therapy; Advisory committee; Ankle foot orthose; assessment; Beneficial effects; Healthcare quality; outcomes; Policy and legislations; Quality measurements; Surveys	Article	Scopus
Perez B., Choi J., Paquet V., Lenker J., Kocher L., Nemade M., Kern C., Steinfeld E.	Comparison of wheelchair securement systems designed for use in large accessible transit vehicles (LATVs)	2019	Assistive Technology	1	https://www.scopus.com/inward/record.uri?eid=2-s2.0-85065674724&doi=10.1080%2f10400435.2019.1604582&partnerID=40&md5=26555fe71576ecab325254c01a991fce	Center for Inclusive Design & Environmental Access, School of Architecture & Planning, University at Buffalo, SUNY, Buffalo, NY, United States; Department of Industrial & Systems Engineering, University at Buffalo, SUNY, Buffalo, NY, United States; Department of Rehabilitation Science, University at Buffalo, SUNY, Buffalo, NY, United States	Perez, B., Center for Inclusive Design & Environmental Access, School of Architecture & Planning, University at Buffalo, SUNY, Buffalo, NY, United States; Choi, J., Center for Inclusive Design & Environmental Access, School of Architecture & Planning, University at Buffalo, SUNY, Buffalo, NY, United States; Paquet, V., Center for Inclusive Design & Environmental Access, School of Architecture & P…	Design challenges in wheelchair securement for fixed-route, large accessible transit vehicles (LATVs) often create difficulties for passengers who use wheelchairs and operational inefficiencies for public transit agencies. Recent innovations in wheelchair securement technology for LATVs may reduce these challenges. This study explored the usability of three commercially available wheelchair secur…	emerging trends; mobility; usability; wheelchair securement; wheelchair transportation; wheeled mobility aids	Carrier mobility; Facings; Usability engineering; Emerging trends; usability; Wheelchair securement; Wheelchair transportation; Wheeled mobility; Wheelchairs	Article	Scopus
Lebrasseur A., Lettre J., OT, MSc, Routhier F., PEng, PhD, Archambault P.S., OT, PhD, Campeau-Lecours A., PEng, PhD, PMP	Assistive robotic arm: Evaluation of the performance of intelligent algorithms	2019	Assistive Technology	2	https://www.scopus.com/inward/record.uri?eid=2-s2.0-85065639357&doi=10.1080%2f10400435.2019.1601649&partnerID=40&md5=fd0433f4cf8e906649ce316153de209d	Department of Rehabilitation, Université Laval, Quebec City, QC, Canada; Centre for Interdisciplinary Research in Rehabilitation and Social Integration, Centre intégré universitaire de santé et de services sociaux de la Capitale-Nationale, Institut de réadaptation en déficience physique de Québec, Quebec City, QC, Canada; Interdisciplinary Research Center in Rehabilitation, Centre intégré de sant…	Lebrasseur, A., Department of Rehabilitation, Université Laval, Quebec City, QC, Canada, Centre for Interdisciplinary Research in Rehabilitation and Social Integration, Centre intégré universitaire de santé et de services sociaux de la Capitale-Nationale, Institut de réadaptation en déficience physique de Québec, Quebec City, QC, Canada; Lettre, J., OT, MSc, Centre for Interdisciplinary Research …	People with upper body disabilities may be limited in their activities of daily living. Robotic arms, such as JACO, are assistive devices that could improve their abilities, independent living, and social participation. However, performing complex tasks with JACO can be time-consuming or tedious. Therefore, some advanced functionalities have been developed to enhance the performance of users. The…	assistive devices; assistive robotic arms; control algorithms; rehabilitation	Algorithms; Patient rehabilitation; Robotic arms; Robotics; Activities of Daily Living; Assistive devices; Assistive robotic arms; Daily living activities; Intelligent Algorithms; Perceived ease of use; Performance variables; Social participation; Intelligent robots	Article	Scopus
Khosla R., Chu M.-T., Khaksar S.M.S., Nguyen K., Nishida T.	Engagement and experience of older people with socially assistive robots in home care	2019	Assistive Technology	1	https://www.scopus.com/inward/record.uri?eid=2-s2.0-85065543709&doi=10.1080%2f10400435.2019.1588805&partnerID=40&md5=949c5166137967af9b75abae7cc91494	Entrepreneurship, Innovation and Marketing, La Trobe Business School, La Trobe University, Melbourne, Australia; Management, Sport and Tourism, La Trobe Business School, La Trobe University, Melbourne, Australia; Research Centre for Computers, Communication and Social Innovations, Department of Entrepreneurship, Innovation and Marketing, La Trobe Business School, La Trobe University, Melbourne, A…	Khosla, R., Entrepreneurship, Innovation and Marketing, La Trobe Business School, La Trobe University, Melbourne, Australia; Chu, M.-T., Entrepreneurship, Innovation and Marketing, La Trobe Business School, La Trobe University, Melbourne, Australia; Khaksar, S.M.S., Management, Sport and Tourism, La Trobe Business School, La Trobe University, Melbourne, Australia; Nguyen, K., Research Centre for …	Social isolation is one of the most common consequences of older people with dementia, especially for those who live at their own dwellings alone due to limited access to social activities. Research relating to the use of social robots in aged care has increasing attention to facilitating the support to care services for older people with dementia. Particularly less attention has focused on the a…	dementia care; engagement; socially assistive robot; user experience	Neurodegenerative diseases; Dementia cares; engagement; Home-care services; Individual preference; Longitudinal research; Social activities; Socially assistive robots; User experience; Robots	Article	Scopus
Lillywhite A., Wolbring G.	Coverage of ethics within the artificial intelligence and machine learning academic literature: The case of disabled people	2019	Assistive Technology		https://www.scopus.com/inward/record.uri?eid=2-s2.0-85064570984&doi=10.1080%2f10400435.2019.1593259&partnerID=40&md5=4349dd4b82e91458a1ccac547e62d563	Community Rehabilitation and Disability Studies, Department of Community Health Sciences, Cumming School of Medicine, University of Calgary, Calgary, AB, Canada	Lillywhite, A., Community Rehabilitation and Disability Studies, Department of Community Health Sciences, Cumming School of Medicine, University of Calgary, Calgary, AB, Canada; Wolbring, G., Community Rehabilitation and Disability Studies, Department of Community Health Sciences, Cumming School of Medicine, University of Calgary, Calgary, AB, Canada	Disabled people are often the anticipated users of scientific and technological products and processes advanced and enabled by artificial intelligence (AI) and machine learning (ML). Disabled people are also impacted by societal impacts of AI/ML. Many ethical issues are identified within AI/ML as fields and within individual applications of AI/ML. At the same time, problems have been identified i…	artificial intelligence; disabled people; ethics; machine learning; people with disabilities	Abstracting; Artificial intelligence; Economic and social effects; Learning systems; Machine learning; Academic literature; Applications of AI; Disabled people; Ethical issues; ethics; People with disabilities; Scoping review; Societal impacts; Philosophical aspects	Article	Scopus
Letaief M., MSc, Rezzoug N., PhD, Gorce P., PhD	Comparison between joystick- and gaze-controlled electric wheelchair during narrow doorway crossing: Feasibility study and movement analysis	2019	Assistive Technology		https://www.scopus.com/inward/record.uri?eid=2-s2.0-85063969208&doi=10.1080%2f10400435.2019.1586011&partnerID=40&md5=c82ac42d9e60590cebd8d4442e6cc525	Laboratoire de Biomodélisation et d’Ingénierie des Handicaps, Université de Toulon, Toulon –var, La Garde, France	Letaief, M., MSc, Laboratoire de Biomodélisation et d’Ingénierie des Handicaps, Université de Toulon, Toulon –var, La Garde, France; Rezzoug, N., PhD, Laboratoire de Biomodélisation et d’Ingénierie des Handicaps, Université de Toulon, Toulon –var, La Garde, France; Gorce, P., PhD, Laboratoire de Biomodélisation et d’Ingénierie des Handicaps, Université de Toulon, Toulon –var, La Garde, France	Due to motor deficiencies inducing low force capabilities or tremor, many persons have great difficulties to use joystick-operated wheelchairs. To alleviate such difficulties, alternative interfaces using vocal, gaze, or brain signals are now becoming available. While promising, these systems still need to be evaluated thoroughly. In this framework, the aims of this study are to analyze and evalu…	door crossing; electric wheelchair; gaze-based control; movement analysis; navigation	Eye tracking; Motion analysis; Navigation; Optoelectronic devices; Electric wheelchair; Eye tracking devices; Feasibility studies; Force capabilities; Movement analysis; Navigation tasks; Optoelectronic systems; Retro-reflective marker; Wheelchairs	Article	Scopus
Ball L.J., Chavez S., Perez G., Bharucha-Goebel D., Smart K., Kundrat K., Carruthers L., Brady C., Leach M., Evans S.	Communication skills among children with spinal muscular atrophy type 1: A parent survey	2019	Assistive Technology		https://www.scopus.com/inward/record.uri?eid=2-s2.0-85063912605&doi=10.1080%2f10400435.2019.1586788&partnerID=40&md5=b0dc3a25f81e31cde15e458129f36e7d	Center for Translational Science, Children’s National Health System, Washington, DC, United States; Department of Physical Medicine and Rehabilitation, Children’s National Health System, Washington, DC, United States; Department of Nutrition, Children’s National Health System, Washington, DC, United States; Department of Pulmonology, Children’s National Health System, Washington, DC, United State…	Ball, L.J., Center for Translational Science, Children’s National Health System, Washington, DC, United States, Department of Physical Medicine and Rehabilitation, Children’s National Health System, Washington, DC, United States; Chavez, S., Department of Nutrition, Children’s National Health System, Washington, DC, United States; Perez, G., Department of Pulmonology, Children’s National Health S…	Spinal muscular atrophy is one of the most common fatal autosomal recessive disorders. Children diagnosed with SMA Type 1 (SMAT1) demonstrate severe oral motor weakness and flaccid dysarthria progressing to complete anarthria. A review of literature illustrates that little has been described regarding augmentative and alternative communication (AAC) use among these children, although communicatio…	Access; assistive technology; augmentative and alternative communication; funding; speech generating device; spinal muscular atrophy; survey	Neuromuscular rehabilitation; Surveying; Surveys; Access; Assistive technology; Augmentative-and-alternative communication; funding; Speech generating devices; Spinal muscular atrophy; Speech communication	Article	Scopus
Karniel N., PT, MSc, Raveh E., PT, PhD, Schwartz I., MD, Portnoy S., MSc, PhD	Functional electrical stimulation compared with ankle-foot orthosis in subacute post stroke patients with foot drop: A pilot study	2019	Assistive Technology	2	https://www.scopus.com/inward/record.uri?eid=2-s2.0-85063901335&doi=10.1080%2f10400435.2019.1579269&partnerID=40&md5=c0e688893e4d9cec32994eb8ceaccd11	Physical Medicine and Rehabilitation, Hadassah Mount Scopus University Hospital, Jerusalem, Israel; Faculty of Medicine, Occupational therapy, School of Health Professions, Tel Aviv University Sackler, Tel Aviv, Israel	Karniel, N., PT, MSc, Physical Medicine and Rehabilitation, Hadassah Mount Scopus University Hospital, Jerusalem, Israel; Raveh, E., PT, PhD, Faculty of Medicine, Occupational therapy, School of Health Professions, Tel Aviv University Sackler, Tel Aviv, Israel; Schwartz, I., MD, Physical Medicine and Rehabilitation, Hadassah Mount Scopus University Hospital, Jerusalem, Israel; Portnoy, S., MSc, P…	Background: The conventional treatment for foot drop includes an ankle-foot orthosis (AFO) or functional electrical stimulation (FES). Goal: To compare gait parameters in patients following a subacute post stroke with foot drop treated with AFO or FES. Method: Twenty one subacute patients with stroke with foot drop were fitted with FES (N = 10) or AFO (N = 11). Evaluations were performed at basel…	ankle-foot orthosis; dynamic electromyography; falls; functional electrical stimulation; gait symmetry; subacute	Drops; Functional electric stimulation; Gait analysis; Ankle-foot orthosis; falls; Functional electri-cal stimulations; Gait symmetries; subacute; Patient treatment	Article	Scopus
Khosravi M., Arazpour M., Sharafat Vaziri A.	An evaluation of the use of a lateral wedged insole and a valgus knee brace in combination in subjects with medial compartment knee osteoarthritis (OA)	2019	Assistive Technology	1	https://www.scopus.com/inward/record.uri?eid=2-s2.0-85063879687&doi=10.1080%2f10400435.2019.1595788&partnerID=40&md5=e88c93b485e3e5e10f68064bca70a6d5	Orthotics and Prosthetics department, University of Social Welfare and Rehabilitation Sciences, Tehran, Iran; Orthopedic surgery department, Tehran University of Medical Sciences, Tehran, Iran	Khosravi, M., Orthotics and Prosthetics department, University of Social Welfare and Rehabilitation Sciences, Tehran, Iran; Arazpour, M., Orthotics and Prosthetics department, University of Social Welfare and Rehabilitation Sciences, Tehran, Iran; Sharafat Vaziri, A., Orthopedic surgery department, Tehran University of Medical Sciences, Tehran, Iran	Aim: The aim of this study was to evaluate the effect (6 weeks) of the use of a knee brace and a lateral wedge insole, both in isolation and combined, on the knee adduction moment (KAM), pain levels, kinematics (velocity, stride length, cadence), knee ROM, function, and satisfaction in patients with knee osteoarthritis (OA). Methods: Twenty-one patients with medial compartment knee OA were partic…	knee adduction moment; Knee orthoses; knee osteoarthritis; lateral wedge insole; medial compartment knee OA; walking parameters	Kinematics; Patient treatment; Knee adduction moment; Knee osteoarthritis; lateral wedge insole; Medial compartment; Orthoses; walking parameters; Physiological models	Article	Scopus
Lenker J.A., PhD, OTR/L, Koester H.H., PhD, Smith R.O., PhD, OTR/L	Toward a national system of assistive technology outcomes measurement	2019	Assistive Technology	1	https://www.scopus.com/inward/record.uri?eid=2-s2.0-85063879652&doi=10.1080%2f10400435.2019.1567620&partnerID=40&md5=fc063fd7b70af1a4a1685630b0530e32	Rehabilitation Science, University at Buffalo, Buffalo, NY, United States; Koester Performance Research, Ann Arbor, MI, United States; Occupational Science & Technology, University of Wisconsin-Milwaukee, Milwaukee, WI, United States	Lenker, J.A., PhD, OTR/L, Rehabilitation Science, University at Buffalo, Buffalo, NY, United States; Koester, H.H., PhD, Koester Performance Research, Ann Arbor, MI, United States; Smith, R.O., PhD, OTR/L, Occupational Science & Technology, University of Wisconsin-Milwaukee, Milwaukee, WI, United States	For more than two decades the assistive technology outcomes literature has featured repeated calls for clinical research to demonstrate the impact of device recommendations, as well as substantial discussion of tools for measuring AT outcomes. Unfortunately, data are still not routinely collected in most AT service delivery settings, which undermines the field. This paper describes a framework fo…	information technology and telecommunications; Outcomes; policy and legislation	Clinical research; Assistive technology; Cloud-based; Outcomes; Policy and legislations; Policy makers; Service delivery; Third parties; Laws and legislation	Article	Scopus
Nordstrom B., PhD, Prellwitz M., PhD	A pilot study of children and parents experiences of the use of a new assistive device, the electro suit Mollii	2019	Assistive Technology	1	https://www.scopus.com/inward/record.uri?eid=2-s2.0-85063864839&doi=10.1080%2f10400435.2019.1579267&partnerID=40&md5=034f65a06623752bfdeb13b0e51c67ef	Department of Research and Development, Region Norrbotten, Luleå, Sweden; Department of Health Sciences, Luleå University of Technology, Luleå, Sweden	Nordstrom, B., PhD, Department of Research and Development, Region Norrbotten, Luleå, Sweden, Department of Health Sciences, Luleå University of Technology, Luleå, Sweden; Prellwitz, M., PhD, Department of Health Sciences, Luleå University of Technology, Luleå, Sweden	Electrical stimulation has been used for many years to treat spasticity in children with cerebral palsy and some improvements have been noted. Building on the benefits of electrical stimulation, a new assistive device, a suit with imbedded electrodes designed to reduce spasticity through electrical stimulation of the antagonistic muscles, has been tested. Aim: The aim of this study was to describ…	assistive device; children with CP; electrical stimulation; qualitative research	Human rehabilitation equipment; Antagonistic muscles; Assistive devices; Children with cerebral palsies; children with CP; Content analysis; Daily activity; Electrical stimulations; Qualitative research; Diseases	Article	Scopus
Tegler H., Pless M., Blom Johansson M., Sonnander K.	Caregivers’, teachers’, and assistants’ use and learning of partner strategies in communication using high-tech speech-generating devices with children with severe cerebral palsy	2019	Assistive Technology	1	https://www.scopus.com/inward/record.uri?eid=2-s2.0-85062801692&doi=10.1080%2f10400435.2019.1581303&partnerID=40&md5=7b0d62fbb4023aa0115dffd6cb60e055	Department of Public Health and Caring Sciences, Disability and Habilitation, Uppsala University, Uppsala, Sweden; Health and Habilitation Services, Uppsala County Council, Uppsala, Sweden; Department of Neuroscience, Speech-Language Pathology, Uppsala University, Uppsala, Sweden	Tegler, H., Department of Public Health and Caring Sciences, Disability and Habilitation, Uppsala University, Uppsala, Sweden, Health and Habilitation Services, Uppsala County Council, Uppsala, Sweden; Pless, M., Department of Public Health and Caring Sciences, Disability and Habilitation, Uppsala University, Uppsala, Sweden; Blom Johansson, M., Department of Neuroscience, Speech-Language Patholo…	Communication with speech generating devices (SGDs) with children with severe physical, communicative and cognitive impairments, such as children with cerebral palsy (CP), can be difficult. Use of partner strategies facilitates the communication and instructional approaches such as feedback and role play facilitate communication partners’ learning in how to use partner strategies. To describe com…	augmentative and alternative communication; cognitive impairment; communication	Communication; Diseases; Human rehabilitation engineering; Surveys; Augmentative-and-alternative communication; Children with cerebral palsies; Cognitive impairment; Communication partners; Least frequently used; Personal assistants; Speech generating devices; Verbal instructions; Speech communication	Article	Scopus
Asghar I., Cang S., Yu H.	Impact evaluation of assistive technology support for the people with dementia	2019	Assistive Technology	4	https://www.scopus.com/inward/record.uri?eid=2-s2.0-85047427431&doi=10.1080%2f10400435.2017.1411405&partnerID=40&md5=fdf396406d7cabda58af30ad70c50c46	Faculty of Science and Technology, Bournemouth University, Poole, United Kingdom; Newcastle Business School, Northumbria University, Newcastle, United Kingdom	Asghar, I., Faculty of Science and Technology, Bournemouth University, Poole, United Kingdom; Cang, S., Newcastle Business School, Northumbria University, Newcastle, United Kingdom; Yu, H., Faculty of Science and Technology, Bournemouth University, Poole, United Kingdom	This study explores important factors of assistive technology (AT) and evaluates their relative impact on AT effectiveness and retention. Questionnaire based survey is used for data collection from 327 people with dementia (PWD). This empirical study uses statistical techniques including exploratory factor analysis for factor identification, linear regression for impact study, Kruskal Wallis H an…	assistive technology; factors; impact; mild dementia; ranking; usability	Multivariant analysis; Neurodegenerative diseases; Surveys; Assistive technology; factors; impact; Mild dementia; ranking; usability; Factor analysis; aged; dementia; female; human; male; middle aged; questionnaire; self help device; statistical model; very elderly; Aged; Aged, 80 and over; Dementia; Female; Humans; Linear Models; Male; Middle Aged; Self-Help Devices; Surveys and Questionnaires	Article	Scopus
Schmitt A.J., McCallum E., Hawkins R.O., Stephenson E., Vicencio K.	The effects of two assistive technologies on reading comprehension accuracy and rate	2019	Assistive Technology	5	https://www.scopus.com/inward/record.uri?eid=2-s2.0-85043320446&doi=10.1080%2f10400435.2018.1431974&partnerID=40&md5=cd24bd0d648d3a3e5ebea25c95ade2bb	Department of Counseling, Psychology and Special Education, Duquesne University, Pittsburgh, PA, United States; School of Human Services, University of Cincinnati, Cincinnati, OH, United States	Schmitt, A.J., Department of Counseling, Psychology and Special Education, Duquesne University, Pittsburgh, PA, United States; McCallum, E., Department of Counseling, Psychology and Special Education, Duquesne University, Pittsburgh, PA, United States; Hawkins, R.O., School of Human Services, University of Cincinnati, Cincinnati, OH, United States; Stephenson, E., Department of Counseling, Psycho…	This study compared the effectiveness of two assistive technologies to accommodate the word reading skills of four middle school students with reading learning disabilities. Kurzweil 3000 is a continuous text-to-speech (TTS) computer software program that allows students to follow along on a computer monitor while passages are read aloud. A reading pen is a discontinuous TTS assistive technology …	assistive technology; reading accommodation; text-to-speech	Computer software; Assistive technology; Implications for futures; Learning disabilities; Middle school students; Reading accommodations; Reading comprehension; Reading skills; Text to speech; Students; adolescent; comparative study; comprehension; human; reading; self help device; student; United States; Adolescent; Comprehension; Humans; Mid-Atlantic Region; Reading; Self-Help Devices; Students	Article	Scopus
Okonji P.E., Ogwezzy D.C.	Awareness and barriers to adoption of assistive technologies among visually impaired people in Nigeria	2019	Assistive Technology	2	https://www.scopus.com/inward/record.uri?eid=2-s2.0-85041602228&doi=10.1080%2f10400435.2017.1421594&partnerID=40&md5=83403f3555e02964aa19f52ab2826a9b	Department of Research Development & Innovation Dissemination, Research and Innovation Office, University of Lagos, Akoka-Yaba, Lagos, Nigeria; Department of Dispensing Opticianry, Delta State School of Health Technology, Ughelli, Delta State, Nigeria	Okonji, P.E., Department of Research Development & Innovation Dissemination, Research and Innovation Office, University of Lagos, Akoka-Yaba, Lagos, Nigeria; Ogwezzy, D.C., Department of Dispensing Opticianry, Delta State School of Health Technology, Ughelli, Delta State, Nigeria	Assistive technology (AT), broadly defined as specialist equipment designed to promote computer access for people with disabilities, is increasingly becoming popular among people with vision impairment as computer use becomes commonplace in society. In developing and emerging economies, however, the adoption of ATs continues to lag behind the developed countries. This study explored barriers to a…	assistive technology; computer use; older adults; vision impairment	Human rehabilitation equipment; Assistive technology; Computer use; Older adults; People with disabilities; Qualitative interviews; Specialist equipments; Vision impairments; Visually impaired people; Surveys; adult; aged; attitude to computers; awareness; female; human; male; middle aged; Nigeria; questionnaire; self help device; very elderly; visually impaired person; young adult; Adult; Aged; …	Article	Scopus
Kurt S.	Moving toward a universally accessible web: Web accessibility and education	2019	Assistive Technology	9	https://www.scopus.com/inward/record.uri?eid=2-s2.0-85041095990&doi=10.1080%2f10400435.2017.1414086&partnerID=40&md5=e308c00190c8830310ddd7dc34390c78	Department of Applied Sciences, Necmettin Erbakan Universitesi, Konya, Turkey	Kurt, S., Department of Applied Sciences, Necmettin Erbakan Universitesi, Konya, Turkey	The World Wide Web is an extremely powerful source of information, inspiration, ideas, and opportunities. As such, it has become an integral part of daily life for a great majority of people. Yet, for a significant number of others, the internet offers only limited value due to the existence of barriers which make accessing the Web difficult, if not impossible. This article illustrates some of th…	accessibility; education; online education; web	E-learning; Education; Websites; accessibility; Achievability; Current status; Educational websites; On-line education; Practical recommendation; Tools and methods; Web accessibility; Electronic document exchange; article; education; human; human experiment; Internet; practice guideline; access to information; Internet; United States; Access to Information; Humans; Internet; United States	Review	Scopus
Wei W.X.J., Fong K.N.K., Chung R.C.K., Myint J.M.W.W., Cheung H.K.Y., Chow E.S.L.	Utility of a unilateral accelerometer for monitoring upper extremity use in subacute stroke patients after discharge from hospital	2019	Assistive Technology	4	https://www.scopus.com/inward/record.uri?eid=2-s2.0-85040988697&doi=10.1080%2f10400435.2017.1414085&partnerID=40&md5=8080b46cd50357233b500c46c8bfa0f7	Department of Rehabilitation Sciences, The Hong Kong Polytechnic University, Hong Kong; Department of Rehabilitation, Kowloon Hospital, Hong Kong; Department of Medicine and Geriatrics, Tuen Mun Hospital, Hong Kong	Wei, W.X.J., Department of Rehabilitation Sciences, The Hong Kong Polytechnic University, Hong Kong; Fong, K.N.K., Department of Rehabilitation Sciences, The Hong Kong Polytechnic University, Hong Kong; Chung, R.C.K., Department of Rehabilitation Sciences, The Hong Kong Polytechnic University, Hong Kong; Myint, J.M.W.W., Department of Rehabilitation, Kowloon Hospital, Hong Kong; Cheung, H.K.Y., D…	This study was to investigate the utility of a unilateral accelerometer, which is commonly used for monitoring upper extremity performance, in subacute stroke patients by comparing its use with other upper extremity assessments. Twenty-four participants were recruited and required to wear an accelerometer on the affected wrist for 3 hours daily for the first 4 weeks after discharge from hospital.…	accelerometer; learned non-use; paretic upper extremity; stroke	Hospitals; Accelerometer data; Action Research Arm Test (ARAT); Fugl-meyer assessments; Good correlations; Hospital discharge; learned non-use; stroke; Upper extremity; Accelerometers; accelerometry; aged; convalescence; devices; electronic device; female; hospital discharge; human; male; middle aged; physiology; self report; stroke rehabilitation; upper limb; Accelerometry; Aged; Female; Humans;…	Article	Scopus
Malcolm M.P., Roll M.C.	Self-reported assistive technology outcomes and personal characteristics in college students with less-apparent disabilities	2019	Assistive Technology	2	https://www.scopus.com/inward/record.uri?eid=2-s2.0-85040974077&doi=10.1080%2f10400435.2017.1406414&partnerID=40&md5=0668d6d850bf29f30c065e6d55b7e228	Department of Occupational Therapy, Colorado State University, Fort Collins, CO, United States; Assistive Technology Resource Center, Colorado State University, Fort Collins, CO, United States; Colorado School of Public Health, Colorado State University, Fort Collins, CO, United States	Malcolm, M.P., Department of Occupational Therapy, Colorado State University, Fort Collins, CO, United States, Assistive Technology Resource Center, Colorado State University, Fort Collins, CO, United States, Colorado School of Public Health, Colorado State University, Fort Collins, CO, United States; Roll, M.C., Department of Occupational Therapy, Colorado State University, Fort Collins, CO, Uni…	The impact of assistive technology (AT) services for college students with less-apparent disabilities is under-reported. Using the Canadian Occupational Performance Measure (COPM), we assessed student Performance and Satisfaction ratings of common academic tasks at the start and end of a semester during which 105 student-clients with less-apparent disabilities received AT services. We examined if…	computer access; developmental disability; education; outcomes	Education; Human rehabilitation equipment; Academic performance; Assistive technology; Computer access; Developmental disability; outcomes; Performance measure; Personal characteristics; Student performance; Students; Canada; disabled person; female; human; male; patient-reported outcome; self help device; self report; university; young adult; Canada; Disabled Persons; Female; Humans; Male; Patie…	Article	Scopus
Liu L.Q., Ferguson-Pell M.	Blood perfusion changes during sacral nerve root stimulation versus surface gluteus electrical stimulation on in seated spinal cord injury	2019	Assistive Technology		https://www.scopus.com/inward/record.uri?eid=2-s2.0-85030173943&doi=10.1080%2f10400435.2017.1340360&partnerID=40&md5=b3dc4d7e73bebc8ccb8b3d26574e51d9	Department of Adult, Child and Midwifery, School of Health and Education, Middlesex University, London, United Kingdom; Faculty of Rehabilitation, University of Alberta, Edmonton, AB, Canada	Liu, L.Q., Department of Adult, Child and Midwifery, School of Health and Education, Middlesex University, London, United Kingdom; Ferguson-Pell, M., Faculty of Rehabilitation, University of Alberta, Edmonton, AB, Canada	The objective of this article is to examine dynamic changes of ischial blood perfusion during sacral nerve root stimulation against surface functional electrical stimulation (FES). Fourteen adults with suprasacral spinal cord injury (SCI) were recruited. The gluteal maximus was activated by surface FES or stimulating sacral nerve roots by functional magnetic stimulation (FMS) or a sacral anterior…	blood perfusion; electrical stimulation; gluteal muscles; ischial tuberosity; pressure ulcer; sacral nerve roots; spinal cord injury	Functional electric stimulation; Blood perfusion; Electrical stimulations; Ischial tuberosity; Pressure ulcers; sacral nerve roots; Spinal cord injuries (SCI); Blood; adolescent; adult; aged; blood flow; comparative study; decubitus; electrostimulation; female; human; innervation; magnetotherapy; male; middle aged; pathophysiology; physiology; radiation response; sacrum; skin; spinal cord injury;…	Article	Scopus
Eicher C., Haesner M., Spranger M., Kuzmicheva O., Gräser A., Steinhagen-Thiessen E.	Usability and acceptability by a younger and older user group regarding a mobile robot-supported gait rehabilitation system	2019	Assistive Technology	4	https://www.scopus.com/inward/record.uri?eid=2-s2.0-85027494460&doi=10.1080%2f10400435.2017.1352051&partnerID=40&md5=4cec676668f62e501d6dc178ee501f65	Geriatrics Research Group, Charité Universitätsmedizin Berlin, Berlin, Germany; Neurologisches Rehabilitationszentrum Friedehorst, Bremen, Germany; Institute of Automation IAT, University of BremenBremen, Germany	Eicher, C., Geriatrics Research Group, Charité Universitätsmedizin Berlin, Berlin, Germany; Haesner, M., Geriatrics Research Group, Charité Universitätsmedizin Berlin, Berlin, Germany; Spranger, M., Neurologisches Rehabilitationszentrum Friedehorst, Bremen, Germany; Kuzmicheva, O., Institute of Automation IAT, University of BremenBremen, Germany; Gräser, A., Institute of Automation IAT, Universit…	The aim of the study was to identify differences regarding usability, acceptability, and barriers of usage of a robot-supported gait rehabilitation system between a younger and older group of patients with gait impairments. A mobile robot-supported gait rehabilitation prototype was tested on a group of geriatric patients aged 60 and above, and on a group of young patients aged 59 and below in a c…	feasibility study; gait rehabilitation; older adults; technology acceptance; usability	Mobile robots; Modular robots; Patient treatment; Surveys; Usability engineering; Feasibility studies; Gait rehabilitation; Older adults; Technology acceptance; usability; Patient rehabilitation; adult; clinical study; clinical trial; doctor patient relation; feasibility study; female; gait; geriatric patient; human; leg; male; middle aged; questionnaire; rehabilitation; robotics; structured inte…	Article	Scopus
McNair K., Lutjen M., Langhamer K., Nieves J., Hreha K.	Comprehensive, technology-based, team approach for a patient with locked-in syndrome: A case report of improved function & quality of life	2019	Assistive Technology		https://www.scopus.com/inward/record.uri?eid=2-s2.0-85027103790&doi=10.1080%2f10400435.2017.1352052&partnerID=40&md5=269808efe442619b85f821e48b49fe4e	Kessler Institute for Rehabilitation, West Orange, NJ, United States; Rutgers Medical School, Newark, NJ, United States; Kessler Foundation, West Orange, NJ, United States	McNair, K., Kessler Institute for Rehabilitation, West Orange, NJ, United States; Lutjen, M., Kessler Institute for Rehabilitation, West Orange, NJ, United States; Langhamer, K., Kessler Institute for Rehabilitation, West Orange, NJ, United States; Nieves, J., Kessler Institute for Rehabilitation, West Orange, NJ, United States, Rutgers Medical School, Newark, NJ, United States; Hreha, K., Kessle…	One of the most severe types of stroke is locked-in syndrome (LIS) due to the loss of almost all voluntary motor functions and a high mortality rate. The majority of the literature regarding LIS is based on case reports that utilized multidisciplinary interventions focused on improving functional communication and respiratory care with minimal focus on motor retraining. These reports were neither…	activities of daily living; mobility; outcomes, rehabilitation	Carrier mobility; Locks (fasteners); Patient treatment; Activities of Daily Living; Augmentative communication; Functional communication; Functional gains; Locked-in syndrome; Motor deficits; Quality of life; Technology-based; Patient rehabilitation; adult; case report; daily life activity; electrotherapy; human; kinesiotherapy; locked in syndrome; male; music therapy; neuroprosthesis; pathophysi…	Article	Scopus
Routhier F., Lettre J., Miller W.C., Borisoff J.F., Keetch K., Mitchell I.M., the CanWheel Research Team	Data Logger Technologies for Powered Wheelchairs: A Scoping Review	2019	Assistive Technology	3	https://www.scopus.com/inward/record.uri?eid=2-s2.0-85027019214&doi=10.1080%2f10400435.2017.1340913&partnerID=40&md5=bb343a7a2bdcd7f77e50baf7d0b51888	Department of Rehabilitation, Université Laval, Quebec City, QC, Canada; Centre for Interdisciplinary Research in Rehabilitation and Social Integration, Centre Intégré Universitaire de Santé et de Services Sociaux de la Capitale-Nationale, Institut de Réadaptation en Déficience Physique de Québec, Quebec City, QC, Canada; Department of Occupational Science and Occupational Therapy, and Rehabilita…	Routhier, F., Department of Rehabilitation, Université Laval, Quebec City, QC, Canada, Centre for Interdisciplinary Research in Rehabilitation and Social Integration, Centre Intégré Universitaire de Santé et de Services Sociaux de la Capitale-Nationale, Institut de Réadaptation en Déficience Physique de Québec, Quebec City, QC, Canada; Lettre, J., Centre for Interdisciplinary Research in Rehabili…	In recent years, studies increasingly employed data loggers to record the objective behaviors of powered wheelchair users. Of the data logging work reported in the literature, the technologies used offer marked differences in characteristics. In order to identify and describe the extent of published research activity that relies on data logger technologies for powered wheelchairs, we performed a …	Data loggers; powered wheelchair; scoping review; wheelchair	Human rehabilitation equipment; Data logger; Google scholar; Grey literature; Manual wheelchair; Powered wheel chairs; Pressure relief; Research activities; Scoping review; Wheelchairs; accelerometry; devices; disabled person; equipment design; human; information processing; rehabilitation; wheelchair; Accelerometry; Data Collection; Disabled Persons; Equipment Design; Humans; Wheelchairs	Article	Scopus
Park J., Park K., Lee B., You H., Yang C.	Classification of Upper Body Shapes Among Korean Male Wheelchair Users to Improve Clothing Fit	2019	Assistive Technology	1	https://www.scopus.com/inward/record.uri?eid=2-s2.0-85026905019&doi=10.1080%2f10400435.2017.1335359&partnerID=40&md5=3fe0033afb318615bae5fa75d24fecc3	Department of Engineering, Texas A&M University–Corpus Christi, Corpus Christi, TX, United States; Department of Industrial and Management Engineering, Pohang University of Science and Technology, Pohang, South Korea; Body & Trim Development Team, Hyundai Motor Company, Hwaseong, South Korea; Department of Fashion Design, Catholic University of Daegu, Gyeongsan, South Korea	Park, J., Department of Engineering, Texas A&M University–Corpus Christi, Corpus Christi, TX, United States; Park, K., Department of Industrial and Management Engineering, Pohang University of Science and Technology, Pohang, South Korea; Lee, B., Body & Trim Development Team, Hyundai Motor Company, Hwaseong, South Korea; You, H., Department of Industrial and Management Engineering, Pohang Univers…	The upper body shape is an important factor to be considered in customized suit jacket design. The present study is intended to identify the lateral upper body shapes of wheelchair users in a sagittal plane. Anthropometric data of 144 Korean male wheelchair users were collected using a tape measure and photography. Three lateral upper body shapes were identified by cluster analysis: convex back w…	Ergonomics and anthropometry; universal design; usability; wheeled mobility aids	Anthropometry; Cluster analysis; Ergonomics; Anthropometric data; Classification accuracy; Discriminant functions; Production process; Universal Design; usability; Wheelchair users; Wheeled mobility; Wheelchairs; adult; anthropometry; body size; clothing; disabled person; ergonomics; human; male; middle aged; physiology; procedures; South Korea; wheelchair; Adult; Anthropometry; Body Size; Clothi…	Article	Scopus
Chua M.C.H., Lim J.H., Yeow R.C.H.	Design and Characterization of a Soft Robotic Therapeutic Glove for Rheumatoid Arthritis	2019	Assistive Technology	3	https://www.scopus.com/inward/record.uri?eid=2-s2.0-85026858323&doi=10.1080%2f10400435.2017.1346000&partnerID=40&md5=c0869b82af94e3772cff94d6c629d340	Biomedical Engineering, National University of Singapore, Singapore, Singapore; Department of Medicine, National University of Singapore, Singapore, Singapore	Chua, M.C.H., Biomedical Engineering, National University of Singapore, Singapore, Singapore; Lim, J.H., Department of Medicine, National University of Singapore, Singapore, Singapore; Yeow, R.C.H., Biomedical Engineering, National University of Singapore, Singapore, Singapore	The modeling and experimentation of a pneumatic actuation system for the development of a soft robotic therapeutic glove is proposed in this article for the prevention of finger deformities in rheumatoid arthritis (RA) patients. The Rehabilitative Arthritis Glove (RA-Glove) is a soft robotic glove fitted with two internal inflatable actuators for lateral compression and massage of the fingers and…	actuator modeling; rheumatoid arthritis; Soft robotics; therapy	Diseases; Geometry; Mechanical actuators; Pneumatics; Robotics; Actuator model; Bending characteristics; Experimental validations; Lateral compression; Pneumatic actuation; Rheumatoid arthritis; Soft robotics; therapy; Pneumatic actuators; adult; exoskeleton (rehabilitation); female; finger; human; male; physiology; pressure; procedures; prosthesis design; rheumatoid arthritis; young adult; Adult…	Article	Scopus
Rashid Z., Pous R., Norrie C.S.	An independent shopping experience for wheelchair users through augmented reality and RFID	2019	Assistive Technology	1	https://www.scopus.com/inward/record.uri?eid=2-s2.0-85021251837&doi=10.1080%2f10400435.2017.1329240&partnerID=40&md5=19f3908c230c8806ec46eb7173b4a651	School of Science and Engineering, University of Dundee, Dundee, United Kingdom; Department of Information and Communication Technologies, Universitat Pompeu Fabra Barcelona, Barcelona, Spain	Rashid, Z., School of Science and Engineering, University of Dundee, Dundee, United Kingdom; Pous, R., Department of Information and Communication Technologies, Universitat Pompeu Fabra Barcelona, Barcelona, Spain; Norrie, C.S., School of Science and Engineering, University of Dundee, Dundee, United Kingdom	People with physical and mobility impairments continue to struggle to attain independence in the performance of routine activities and tasks. For example, browsing in a store and interacting with products located beyond an arm’s length may be impossible without the enabling intervention of a human assistant. This research article describes a study undertaken to design, develop, and evaluate poten…	accessibility; augmented reality (AR); human-centered computing; radio frequency identification (RFID); wheelchair users	Augmented reality; Radio waves; Wheelchairs; accessibility; Human-centered computing; Interaction methods; User-centered approach; Wheelchair users; Radio frequency identification (RFID); adult; aged; daily life activity; female; human; male; middle aged; radio frequency identification device; self help device; wheelchair; Activities of Daily Living; Adult; Aged; Augmented Reality; Female; Humans…	Article	Scopus
Chang H.-Y., Luo C.-H., Lo T.-S., Chen H.-C., Huang K.-Y., Liao W.-H., Su M.-C., Liu S.-Y., Wang N.-M.	Benefits of incorporating the adaptive dynamic range optimization amplification scheme into an assistive listening device for people with mild or moderate hearing loss	2018	Assistive Technology		https://www.scopus.com/inward/record.uri?eid=2-s2.0-85028556550&doi=10.1080%2f10400435.2017.1317674&partnerID=40&md5=22dc83bcf0d4ae708c2d49f62f54255a	Department of Electrical Engineering, National Cheng-Kung University, Tainan, Taiwan; School of Speech Language Pathology and Audiology, Chung Shan Medical University, Taichung, Taiwan; Dept. of Otolaryngology, Chung Shan Medical University Hospital, Taichung, Taiwan; Graduate Institute of Audiology and Speech Therapy, National Kaohsiung Normal University, Kaohsiung, Taiwan; School of Medicine, N…	Chang, H.-Y., Department of Electrical Engineering, National Cheng-Kung University, Tainan, Taiwan; Luo, C.-H., Department of Electrical Engineering, National Cheng-Kung University, Tainan, Taiwan; Lo, T.-S., School of Speech Language Pathology and Audiology, Chung Shan Medical University, Taichung, Taiwan, Dept. of Otolaryngology, Chung Shan Medical University Hospital, Taichung, Taiwan; Chen, H…	This study investigated whether a self-designed assistive listening device (ALD) that incorporates an adaptive dynamic range optimization (ADRO) amplification strategy can surpass a commercially available monaurally worn linear ALD, SM100. Both subjective and objective measurements were implemented. Mandarin Hearing-In-Noise Test (MHINT) scores were the objective measurement, whereas participant …	adaptive dynamic range optimization (ADRO); assistive listening device (ALD); Mandarin Hearing-In-Noise Test (MHINT)	Linear systems; Adaptive dynamic range; Amplification scheme; Amplification strategy; Assistive listening; Noise test; Noisy environment; Objective measurement; Subjective measurements; Audition; adult; aged; audiometry; communication aid; devices; equipment design; female; hearing impairment; human; male; middle aged; patient satisfaction; signal processing; speech; young adult; Adult; Aged; Aud…	Article	Scopus
Martin S., Armstrong E., Thomson E., Vargiu E., Solà M., Dauwalder S., Miralles F., Daly Lynn J.	A qualitative study adopting a user-centered approach to design and validate a brain computer interface for cognitive rehabilitation for people with brain injury	2018	Assistive Technology	5	https://www.scopus.com/inward/record.uri?eid=2-s2.0-85023778474&doi=10.1080%2f10400435.2017.1317675&partnerID=40&md5=e9ef53fbfe7920d56853b1a58af44dd8	Faculty of life and Health Sciences, Ulster University, Jordanstown, United Kingdom; Cedar Foundation, Belfast, United Kingdom; eHealth Department, EURECAT, Barcelona, Spain	Martin, S., Faculty of life and Health Sciences, Ulster University, Jordanstown, United Kingdom; Armstrong, E., Cedar Foundation, Belfast, United Kingdom; Thomson, E., Cedar Foundation, Belfast, United Kingdom; Vargiu, E., eHealth Department, EURECAT, Barcelona, Spain; Solà, M., eHealth Department, EURECAT, Barcelona, Spain; Dauwalder, S., eHealth Department, EURECAT, Barcelona, Spain; Miralles, …	Cognitive rehabilitation is established as a core intervention within rehabilitation programs following a traumatic brain injury (TBI). Digitally enabled assistive technologies offer opportunities for clinicians to increase remote access to rehabilitation supporting transition into home. Brain Computer Interface (BCI) systems can harness the residual abilities of individuals with limited function…	Cognitive impairment; computer access; information technology and telecommunications; neurorehabilitation and brain computer interfaces; service delivery	Brain; Computer control systems; Human computer interaction; Interfaces (computer); Patient rehabilitation; User centered design; Cognitive impairment; Cognitive rehabilitation; Computer access; International consortium; Neurorehabilitation; Rehabilitation programs; Service delivery; Traumatic Brain Injuries; Brain computer interface; adult; brain computer interface; brain injury; cognitive defec…	Article	Scopus
Sakamaki I., Adams K., Medina M.F.G., Cruz J.L.C., Jafari N., Tavakoli M., Janz H.	Preliminary testing by adults of a haptics-assisted robot platform designed for children with physical impairments to access play	2018	Assistive Technology	1	https://www.scopus.com/inward/record.uri?eid=2-s2.0-85023172214&doi=10.1080%2f10400435.2017.1318974&partnerID=40&md5=1d2de06956b5a4c7550ce02ee7e24fcc	Faculty of Rehabilitation Medicine, University of Alberta, Edmonton, AB, Canada; Glenrose Rehabilitation Hospital, Edmonton, AB, Canada; Facultad de Ciencias de la Salud, Universidad del RosarioBogota, Colombia; Escuela Colombiana de Ingeniería Julio Garavito, Bogota, Colombia; Department of Electrical and Computer Engineering, University of Alberta, Edmonton, AB, Canada	Sakamaki, I., Faculty of Rehabilitation Medicine, University of Alberta, Edmonton, AB, Canada; Adams, K., Faculty of Rehabilitation Medicine, University of Alberta, Edmonton, AB, Canada, Glenrose Rehabilitation Hospital, Edmonton, AB, Canada; Medina, M.F.G., Facultad de Ciencias de la Salud, Universidad del RosarioBogota, Colombia, Escuela Colombiana de Ingeniería Julio Garavito, Bogota, Colombia…	Development of children’s cognitive and perceptual skills depends heavily on object exploration and experience in their physical world. For children who have severe physical impairments, one of the biggest concerns is the loss of opportunities for meaningful play with objects, including physical contact and manipulation. Assistive robots can enable children to perform object manipulation through …	haptics; object manipulation; people with disabilities; robot; virtual fixtures; vision	Fixtures (tooling); Haptic interfaces; Robots; Vision; Haptics; Motion characteristics; Object exploration; Object manipulation; People with disabilities; Perceptual skills; Physical impairments; Virtual fixture; Visual servoing; adult; child parent relation; devices; disabled person; equipment design; female; human; male; physiology; procedures; rehabilitation; robotics; task performance; touch;…	Article	Scopus
Raveh E., Friedman J., Portnoy S.	Visuomotor behaviors and performance in a dual-task paradigm with and without vibrotactile feedback when using a myoelectric controlled hand	2018	Assistive Technology	11	https://www.scopus.com/inward/record.uri?eid=2-s2.0-85021115367&doi=10.1080%2f10400435.2017.1323809&partnerID=40&md5=401b6cc68cad3063f8efdad81ebd1c2a	Occupational Therapy Department, Sackler Faculty of Medicine, Tel Aviv University, Tel Aviv, Israel; Physical Therapy Department, Sackler Faculty of Medicine, Tel Aviv University, Tel Aviv, Israel; Physical Medicine and Rehabilitation Department, Hadassah Medical Center, Jerusalem, Israel	Raveh, E., Occupational Therapy Department, Sackler Faculty of Medicine, Tel Aviv University, Tel Aviv, Israel; Friedman, J., Physical Therapy Department, Sackler Faculty of Medicine, Tel Aviv University, Tel Aviv, Israel; Portnoy, S., Occupational Therapy Department, Sackler Faculty of Medicine, Tel Aviv University, Tel Aviv, Israel, Physical Medicine and Rehabilitation Department, Hadassah Medi…	Prosthesis users allocate visual attention to their prosthetic hand while performing activities of daily living (ADLs), due to absence of sensory feedback. Dual-task assignments present competition for visual attention and may affect the performance of ADLs. Vibrotactile feedback (VTF) is a frequently-used method to provide prosthesis users with tactile feedback. However, the effect of adding VTF…	motor performance; myoelectric prostheses; upper limb amputation; visual attention	Behavioral research; Computer games; Eye tracking; Feedback; Off road vehicles; Sensory feedback; Visual communication; Activities of daily living (ADLs); Motor performance; Myoelectric prosthesis; Prosthetic hands; Tactile feedback; Upper limb amputation; Vibro-tactile feedbacks; Visual Attention; Myoelectrically controlled prosthetics; adult; electromyography; feedback system; female; hand; hum…	Article	Scopus
Zsiga K., Tóth A., Pilissy T., Péter O., Dénes Z., Fazekas G.	Evaluation of a companion robot based on field tests with single older adults in their homes	2018	Assistive Technology	11	https://www.scopus.com/inward/record.uri?eid=2-s2.0-85021115013&doi=10.1080%2f10400435.2017.1322158&partnerID=40&md5=c4e7a61fafea427ab59b772448873c81	Medical-Engineering Rehabilitation Research Programme, National Institute for Medical Rehabilitation, Budapest, Hungary; Rehabilitation Department, Szent János Hospital, Budapest, Hungary; Department of Manufacturing Science and Engineering, Budapest University of Technology and Economics, Budapest, Hungary	Zsiga, K., Medical-Engineering Rehabilitation Research Programme, National Institute for Medical Rehabilitation, Budapest, Hungary, Rehabilitation Department, Szent János Hospital, Budapest, Hungary; Tóth, A., Department of Manufacturing Science and Engineering, Budapest University of Technology and Economics, Budapest, Hungary; Pilissy, T., Medical-Engineering Rehabilitation Research Programme, …	The growing number of older adults places insurmountable load on family members and professional caregivers. Assistive technology with the aid of robots can present a possible solution. The goal of this article was to test a companion robot supporting older adults in their home environments. Eight senior volunteers were involved in the field test. They all lived alone and were self-supporting. Th…	communication; older adults; robotics	Communication; Robotics; Speech recognition; Touch screens; Weather forecasting; Assistive technology; Cognitive assistance; Communication modalities; Home environment; Natural languages; Older adults; Touch screen displays; Verbal communications; Robots; adult; assistive technology; caregiver; clinical article; female; home environment; human; language; locomotion; male; robotics; shopping; spee…	Article	Scopus
Sarigul-Klijn Y., Smith B.W., Reinkensmeyer D.J.	Design and experimental evaluation of yoked hand-clutching for a lever drive chair	2018	Assistive Technology	3	https://www.scopus.com/inward/record.uri?eid=2-s2.0-85021067055&doi=10.1080%2f10400435.2017.1326413&partnerID=40&md5=c99c68af498bbf1551654188c7abf4a4	Department of Biomedical Engineering, University of California, Irvine, CA, United States; Department of Mechanical and Aerospace Engineering, University of California, Irvine, CA, United States; Department of Anatomy and Neurobiology, University of California, Irvine, CA, United States	Sarigul-Klijn, Y., Department of Biomedical Engineering, University of California, Irvine, CA, United States; Smith, B.W., Department of Mechanical and Aerospace Engineering, University of California, Irvine, CA, United States; Reinkensmeyer, D.J., Department of Biomedical Engineering, University of California, Irvine, CA, United States, Department of Mechanical and Aerospace Engineering, Univers…	Lever-drive wheelchairs lower physical strain but are less maneuverable than push-rim wheelchairs. Here, we study a possible solution in which the user simultaneously actuates clutches mounted between the levers and wheels each stroke via a clutch handle attached to one lever; this solution is of particular interest for user groups with only one functional hand. First, to demonstrate maneuverabil…	rehabilitation; stroke; wheelchair	Patient rehabilitation; Wheelchairs; Constrained space; Experimental evaluation; Physical strains; Physiological cost indices; Speed improvement; stroke; Time constants; Training sessions; Clutches; adult; biomechanics; devices; equipment design; hand; heart rate; human; male; physiology; stroke rehabilitation; wheelchair; young adult; Adult; Biomechanical Phenomena; Equipment Design; Hand; Heart…	Article	Scopus
Yang B.-S., Chen Y.-W., Tong J.-R.	User experience of lower-limb orthosis	2018	Assistive Technology	1	https://www.scopus.com/inward/record.uri?eid=2-s2.0-85020621724&doi=10.1080%2f10400435.2017.1322157&partnerID=40&md5=b1d55b8e99b52df400671839c41ab4d7	Department of Mechanical Engineering, National Chiao Tung University, Hsinchu, Taiwan; Institute of Biomedical Engineering, National Chiao Tung University, Hsinchu, Taiwan	Yang, B.-S., Department of Mechanical Engineering, National Chiao Tung University, Hsinchu, Taiwan, Institute of Biomedical Engineering, National Chiao Tung University, Hsinchu, Taiwan; Chen, Y.-W., Department of Mechanical Engineering, National Chiao Tung University, Hsinchu, Taiwan; Tong, J.-R., Department of Mechanical Engineering, National Chiao Tung University, Hsinchu, Taiwan	If an assistive device is not acceptable to the user, it will not achieve efficacy and would be resource-wasting. This study employed in-depth interviews to understand what users’ individual activities of daily living, problems of using orthoses, and considerations for selecting orthoses are. We conducted qualitative interviews with 35 lower-limb orthosis users, and semi-structured interviews wer…	activity of daily living; assistive device; education; in-depth interview; usability	Education; Orthotics; Activities of Daily Living; Activity of daily livings; Assistive devices; In-depth interviews; Qualitative interviews; Semi structured interviews; usability; User experience; Surveys; cohort analysis; daily life activity; human; lower limb; orthosis; pathophysiology; patient satisfaction; qualitative research; self help device; Activities of Daily Living; Cohort Studies; Hum…	Article	Scopus
Hall M.L., Lobo M.A.	Design and development of the first exoskeletal garment to enhance arm mobility for children with movement impairments	2018	Assistive Technology	4	https://www.scopus.com/inward/record.uri?eid=2-s2.0-85019758466&doi=10.1080%2f10400435.2017.1320690&partnerID=40&md5=8aa091673ccac05cebf96e08ef89a960	Department of Fashion & Apparel Studies, University of Delaware, Newark, DE, United States; Department of Physical Therapy, University of Delaware, Newark, DE, United States; Biomechanics and Movement Science Program, University of Delaware, Newark, DE, United States	Hall, M.L., Department of Fashion & Apparel Studies, University of Delaware, Newark, DE, United States, Department of Physical Therapy, University of Delaware, Newark, DE, United States, Biomechanics and Movement Science Program, University of Delaware, Newark, DE, United States; Lobo, M.A., Department of Physical Therapy, University of Delaware, Newark, DE, United States, Biomechanics and Moveme…	Children with a variety of diagnoses have impairments that limit their arm function. Despite the fact that arm function is important for early learning and activities of daily living, there are few tools to assist movement for these children, and existing devices have challenges related to cost, accessibility, comfort, and aesthetics. In this article, we describe the design process and developmen…	assistive technology; design for disability; functional design; open source design; user-centered; wearable technology	Diagnosis; Exoskeleton (Robotics); Wearable technology; Activities of Daily Living; Assistive technology; Design and Development; Functional design; Medical modeling; Open sources; User-centered; User-centered approach; User centered design; arm; arthrogryposis; disabled person; exoskeleton (rehabilitation); human; infant; male; pathophysiology; procedures; prosthesis design; Arm; Arthrogryposis;…	Article	Scopus
Rizzo J.-R., Conti K., Thomas T., Hudson T.E., Wall Emerson R., Kim D.S.	A new primary mobility tool for the visually impaired: A white cane—adaptive mobility device hybrid	2018	Assistive Technology	5	https://www.scopus.com/inward/record.uri?eid=2-s2.0-85019213338&doi=10.1080%2f10400435.2017.1312634&partnerID=40&md5=83d564df914ec5a7402a345e6f52d8d4	Department of Physical Medicine & Rehabilitation, NYU School of Medicine, New York, NY, United States; Department of Neurology, NYU School of Medicine, New York, NY, United States; Tactile Navigation Tools, LLC, New York, NY, United States; Department of Blindness and Low Vision Studies, Western Michigan University, Kalamazoo, MI, United States	Rizzo, J.-R., Department of Physical Medicine & Rehabilitation, NYU School of Medicine, New York, NY, United States, Department of Neurology, NYU School of Medicine, New York, NY, United States, Tactile Navigation Tools, LLC, New York, NY, United States; Conti, K., Department of Physical Medicine & Rehabilitation, NYU School of Medicine, New York, NY, United States; Thomas, T., Department of Phys…	This article describes pilot testing of an adaptive mobility device-hybrid (AMD-H) combining properties of two primary mobility tools for people who are blind: the long cane and adaptive mobility devices (AMDs). The long cane is the primary mobility tool used by people who are blind and visually impaired for independent and safe mobility and AMDs are adaptive devices that are often lightweight fr…	adaptive cane; blind; cane; mobility	Carrier mobility; Obstacle detectors; adaptive cane; blind; Blind and visually impaired; cane; Detection threshold; Lateral dimension; Obstacle detection; Visually impaired; Drops; adult; cane; devices; equipment design; female; human; male; middle aged; rehabilitation; self help device; signal processing; visually impaired person; walking difficulty; Adult; Canes; Equipment Design; Female; Human…	Article	Scopus
Chan F.H.N., Eshraghi M., Alhazmi M.A., Sawatzky B.J.	The effect of caster types on global rolling resistance in manual wheelchairs on indoor and outdoor surfaces	2018	Assistive Technology	4	https://www.scopus.com/inward/record.uri?eid=2-s2.0-85020297111&doi=10.1080%2f10400435.2017.1307880&partnerID=40&md5=a50e085bc1b930f8af223f5fdcc823df	International Collaboration on Repair Discoveries, Blusson Spinal Cord Centre, Vancouver, BC, Canada; Department of Orthopaedics, Faculty of Medicine, University of British Columbia (UBC), Vancouver, BC, Canada; Mechanical Engineering Department, College of Engineering and Islamic Architecture, Umm Al-Qura University (UQU), Makkah, Saudi Arabia	Chan, F.H.N., International Collaboration on Repair Discoveries, Blusson Spinal Cord Centre, Vancouver, BC, Canada; Eshraghi, M., Department of Orthopaedics, Faculty of Medicine, University of British Columbia (UBC), Vancouver, BC, Canada, Mechanical Engineering Department, College of Engineering and Islamic Architecture, Umm Al-Qura University (UQU), Makkah, Saudi Arabia; Alhazmi, M.A., Mechanic…	An important aspect of reducing the strain of wheeling is to decrease rolling resistance. Previous laboratory research, using a treadmill, determined that smaller casters significantly increased rolling resistance. The purpose of this study was to determine the effect of caster size on various indoor and outdoor surfaces on global wheelchair rolling resistance. Three caster types with sizes 4 in,…	caster type; indoor & outdoor surfaces; rolling resistance; wheelchair mobility; wheelchairs	Rolling resistance; Wheelchairs; caster type; Force transducers; Manual wheelchair; Outdoor environment; Outdoor surface; Power wheelchair; Repeated measures; Wheelchair mobility; Analysis of variance (ANOVA); equipment design; human; surface property; wheelchair; Equipment Design; Humans; Surface Properties; Wheelchairs	Article	Scopus
Cronin A.F.	Assistive technology reasoning in rural school-based occupational therapy	2018	Assistive Technology		https://www.scopus.com/inward/record.uri?eid=2-s2.0-85020223523&doi=10.1080%2f10400435.2017.1309600&partnerID=40&md5=402d370f768e8ff4919d793629ca0dc1	Division of Occupational Therapy, West Virginia University, Morgantown, WV, United States	Cronin, A.F., Division of Occupational Therapy, West Virginia University, Morgantown, WV, United States	This study explores broad issues associated with assistive technology (AT) service provision in rural school settings. The study was designed to explore the beliefs of practitioners working in rural schools about their role in AT service provision. This article includes an extensive review of the literature and findings from a naturalistic study of AT service provision experience in rural school …	education; emerging trends; rural; service delivery	Education; Occupational therapy; Rural areas; Assistive technology; Emerging trends; Ethnographic interviews; In-service education; Naturalistic study; Open-ended questionnaire; Professional backgrounds; Service delivery; Surveys; assistive technology; clinical article; curriculum; female; health care delivery; human; interview; leadership; male; occupational therapy; open ended questionnaire; ph…	Article	Scopus
McCarthy J.W., Boster J.B.	A comparison of the performance of 2.5 to 3.5-year-old children without disabilities using animated and cursor-based scanning in a contextual scene	2018	Assistive Technology	2	https://www.scopus.com/inward/record.uri?eid=2-s2.0-85018842611&doi=10.1080%2f10400435.2017.1307883&partnerID=40&md5=e3396997c211db0d7467cc36516dd1e5	Communication Sciences and Disorders, Ohio University, Athens, OH, United States	McCarthy, J.W., Communication Sciences and Disorders, Ohio University, Athens, OH, United States; Boster, J.B., Communication Sciences and Disorders, Ohio University, Athens, OH, United States	Although recent evidence suggests learning demands for children can be reduced by organizing augmentative and alternative communication (AAC) displays in contextual scenes, there is little evidence on how such scenes could be made accessible for children who cannot use direct selection. Using a line drawn scene of a living room, a traditional traveling cursor (a green outline of objects within th…	augmentative and alternative communication; computer access; pediatrics; usability	Animation; Pediatrics; Scanning; Age-related; Augmentative-and-alternative communication; Children learning; Computer access; Learning sessions; Living room; usability; Human rehabilitation engineering; age; communication aid; computer; computer interface; female; human; interpersonal communication; male; preschool child; task performance; Age Factors; Child, Preschool; Communication; Communicati…	Article	Scopus
Papadopoulos K., Koustriava E., Koukourikos P.	Orientation and mobility aids for individuals with blindness: Verbal description vs. audio-tactile map	2018	Assistive Technology	5	https://www.scopus.com/inward/record.uri?eid=2-s2.0-85018364664&doi=10.1080%2f10400435.2017.1307879&partnerID=40&md5=42697b493a44b492f87dca3b3827d3f3	Department of Educational and Social Policy, University of Macedonia, Thessaloniki, Greece; Ministry of Education, Research and Religious Affairs, Thessaloniki, Greece	Papadopoulos, K., Department of Educational and Social Policy, University of Macedonia, Thessaloniki, Greece; Koustriava, E., Department of Educational and Social Policy, University of Macedonia, Thessaloniki, Greece; Koukourikos, P., Ministry of Education, Research and Religious Affairs, Thessaloniki, Greece	Individuals with visual impairment face significant challenges traveling in the physical environment. Independent movement is directly connected to the quality of someone’s life, and thus, orientation and mobility issues are always listed among the top priorities of research in the field. The aim of the present research was to examine the level of accuracy of the cognitive map developed through t…	audio-tactile map; blindness; orientation & mobility aids; verbal descriptions	Cognitive systems; Eye protection; Ophthalmology; Audio-tactile maps; blindness; Cognitive maps; Mobility aids; Physical environments; Points of interest; verbal descriptions; Visual impairment; Maps; adult; blindness; female; human; male; map; middle aged; physiology; self help device; sensory aid; spatial orientation; young adult; Adult; Blindness; Female; Humans; Male; Maps as Topic; Middle Ag…	Article	Scopus
Holmqvist E., Thunberg G., Peny Dahlstrand M.	Gaze-controlled communication technology for children with severe multiple disabilities: Parents and professionals’ perception of gains, obstacles, and prerequisites	2018	Assistive Technology	5	https://www.scopus.com/inward/record.uri?eid=2-s2.0-85018359762&doi=10.1080%2f10400435.2017.1307882&partnerID=40&md5=2d7659cd89b77aab133c228ac0f156d5	Department of Health and Rehabilitation, Institute of Neuroscience and Physiology, Sahlgrenska Academy at the University of Gothenburg, Gothenburg, Sweden; Dart Centre for AAC and AT, Sahlgrenska University Hospital, Gothenburg, Sweden; Regional Habilitation Centre, Sahlgrenska University Hospital, Gothenburg, Sweden	Holmqvist, E., Department of Health and Rehabilitation, Institute of Neuroscience and Physiology, Sahlgrenska Academy at the University of Gothenburg, Gothenburg, Sweden, Dart Centre for AAC and AT, Sahlgrenska University Hospital, Gothenburg, Sweden; Thunberg, G., Dart Centre for AAC and AT, Sahlgrenska University Hospital, Gothenburg, Sweden; Peny Dahlstrand, M., Department of Health and Rehabi…	The aim of this study was to explore parents’ and professionals’ thoughts of how a gaze-controlled computer can be beneficial to children with severe multiple disabilities. All systems were provided primarily for symbol-based communication, but were also used for other purposes such as play, leisure and school activities. A further aim was to investigate factors affecting usability, specifically …	augmentative and alternative communication; communication; computer access; pediatrics; usability	Communication; Pediatrics; Technology transfer; Augmentative-and-alternative communication; Communication technologies; Computer access; Learning opportunity; Multiple disabilities; Qualitative approach; Semi structured interviews; usability; Human rehabilitation engineering; adolescent; child; child parent relation; communication aid; computer interface; eye fixation; female; handicapped child; …	Article	Scopus
Abdullah S.J., Shaikh Mohammed J.	Modeling and Simulation of Two Wheelchair Accessories for Pushing Doors	2018	Assistive Technology	2	https://www.scopus.com/inward/record.uri?eid=2-s2.0-85016096670&doi=10.1080%2f10400435.2017.1293193&partnerID=40&md5=365c1b191310063cf1b11ac9aef8f546	Department of Manufacturing Technology, Faculty of Innovative Design and Technology, Universiti Sultan Zainal Abidin, Gong Badak Campus, Kuala, Terengganu, Malaysia	Abdullah, S.J., Department of Manufacturing Technology, Faculty of Innovative Design and Technology, Universiti Sultan Zainal Abidin, Gong Badak Campus, Kuala, Terengganu, Malaysia; Shaikh Mohammed, J., Department of Manufacturing Technology, Faculty of Innovative Design and Technology, Universiti Sultan Zainal Abidin, Gong Badak Campus, Kuala, Terengganu, Malaysia	Independent mobility is vital to individuals of all ages, and wheelchairs have proven to be great personal mobility devices. The tasks of opening and navigating through a door are trivial for healthy people, while the same tasks could be difficult for some wheelchair users. A wide range of intelligent wheelchair controllers and systems, robotic arms, or manipulator attachments integrated with whe…	door pushing; mobility; modeling simulation; obstacle gliding; physical disability; wheelchair accessory	Carrier mobility; Intelligent robots; Manipulators; Robotics; Wheels; Commercial products; Independent mobilities; Intelligent wheelchair; Model and simulation; Model simulation; obstacle gliding; Personal mobility; Physical disability; Wheelchairs; computer aided design; computer simulation; equipment design; mechanics; procedures; wheelchair; Computer Simulation; Computer-Aided Design; Equipmen…	Article	Scopus
Koester H.H., Arthanat S.	Text entry rate of access interfaces used by people with physical disabilities: A systematic review	2018	Assistive Technology	8	https://www.scopus.com/inward/record.uri?eid=2-s2.0-85016930252&doi=10.1080%2f10400435.2017.1291544&partnerID=40&md5=41e62bc5a83c00f136b95664af461509	Koester Performance Research, Ann Arbor, MI, United States; Department of Occupational Therapy, University of New Hampshire, Durham, NH, United States	Koester, H.H., Koester Performance Research, Ann Arbor, MI, United States; Arthanat, S., Department of Occupational Therapy, University of New Hampshire, Durham, NH, United States	This study systematically reviewed the research on assistive technology (AT) access interfaces used for text entry, and conducted a quantitative synthesis of text entry rates (TER) associated with common interfaces. We searched 10 databases and included studies in which: typing speed was reported in words per minute (WPM) or equivalent; the access interface was available for public use; and indiv…	accessibility; assistive technology; computer access; physical impairment; text entry rate; typing	Behavioral research; Decision making; Signaling; Speech recognition; accessibility; Assistive technology; Computer access; Physical impairments; Text entry; typing; Brain computer interface; automatic speech recognition; brain computer interface; communication aid; computer interface; disabled person; human; rehabilitation; writing; Brain-Computer Interfaces; Communication Aids for Disabled; Disa…	Article	Scopus
Ogrinc M., Farkhatdinov I., Walker R., Burdet E.	Horseback riding therapy for a deafblind individual enabled by a haptic interface	2018	Assistive Technology	2	https://www.scopus.com/inward/record.uri?eid=2-s2.0-85016111478&doi=10.1080%2f10400435.2017.1288178&partnerID=40&md5=bd82e9c7795c0ee02b01f095fdb711ce	Department of Bioengineering, Imperial College of Science, Technology and Medicine, London, United Kingdom; Shadow Robot Company LTD, London, United Kingdom; School of Electronic Engineering and Computer Science, Queen Mary University of London, London, United Kingdom	Ogrinc, M., Shadow Robot Company LTD, London, United Kingdom; Farkhatdinov, I., Department of Bioengineering, Imperial College of Science, Technology and Medicine, London, United Kingdom, School of Electronic Engineering and Computer Science, Queen Mary University of London, London, United Kingdom; Walker, R., Shadow Robot Company LTD, London, United Kingdom; Burdet, E., Department of Bioengineer…	We present a haptic interface to help deafblind people to practice horseback riding as a recreational and therapeutic activity. Horseback riding is a form of therapy which can improve self-esteem and sensation of independence. It has been shown to benefit people with various medical conditions—including autism. However, in the case of deafblind riders, an interpreter must stand by at all times to…	Autism; deafblind; navigation; vibrotactile	Diseases; Mice (computer peripherals); Navigation; Surveys; Autism; Deaf blinds; Deaf-blind people; Medical conditions; Self esteem; Therapeutic activity; User attitudes; Vibrotactile; Haptic interfaces; adult; animal; autism; communication aid; deafblindness; drug therapy; equipment design; female; hippotherapy; horse; human; mobile application; smartphone; vibration; young adult; Adult; Animals…	Article	Scopus
Cha Y.-J.	Are patients with hemiplegic stroke really walking with a cane fitted at the greater trochanter?	2018	Assistive Technology	1	https://www.scopus.com/inward/record.uri?eid=2-s2.0-85013945690&doi=10.1080%2f10400435.2017.1284167&partnerID=40&md5=582250795396a85ca9d1cce6a97d5318	Department of Physical Therapy, College of Health and Medical Science, Daejeon University, Daejeon, South Korea	Cha, Y.-J., Department of Physical Therapy, College of Health and Medical Science, Daejeon University, Daejeon, South Korea	The purpose of this study was to determine the cane lengths currently used by patients with hemiplegic stroke for ambulatory assistance. The sample consisted of 116 adults with hemiplegic stroke. Descriptive statistics and Chi-square test for trend were conducted to examine the distributions of cane lengths, which were classified as follows: reaching >2 cm below the greater trochanter (GT), reach…	cane length; greater trochanter; hemiplegia; walking	Human rehabilitation equipment; cane length; Chi-square tests; Descriptive statistics; Four-point; greater trochanter; hemiplegia; walking; Statistical tests; aged; anatomy and histology; cane; female; femur; hemiplegia; human; male; middle aged; physiology; procedures; stroke rehabilitation; walking; Aged; Canes; Female; Femur; Hemiplegia; Humans; Male; Middle Aged; Stroke Rehabilitation; Walking	Article	Scopus
Ghoseiri K., Zheng Y.P., Leung A.K.L., Rahgozar M., Aminian G., Masoumi M., Safari M.R.	Temperature measurement and control system for transtibial prostheses: Single subject clinical evaluation	2018	Assistive Technology	1	https://www.scopus.com/inward/record.uri?eid=2-s2.0-85013077957&doi=10.1080%2f10400435.2016.1272070&partnerID=40&md5=33719bb522422297c5473a9ec03609bb	Department of Orthotics and Prosthetics, School of Rehabilitation Sciences, Hamadan University of Medical Sciences, Hamadan, Iran; Interdisciplinary Division of Biomedical Engineering, Faculty of Engineering, Hong Kong Polytechnic University, Kowloon, Hong Kong; Department of Orthotics and Prosthetics, University of Social Welfare and Rehabilitation Sciences, Tehran, Iran; Department of Biostatis…	Ghoseiri, K., Department of Orthotics and Prosthetics, School of Rehabilitation Sciences, Hamadan University of Medical Sciences, Hamadan, Iran, Interdisciplinary Division of Biomedical Engineering, Faculty of Engineering, Hong Kong Polytechnic University, Kowloon, Hong Kong, Department of Orthotics and Prosthetics, University of Social Welfare and Rehabilitation Sciences, Tehran, Iran; Zheng, Y.…	The snug fit of a prosthetic socket over the residual limb can disturb thermal balance and put skin integrity in jeopardy by providing an unpleasant and infectious environment. The prototype of a temperature measurement and control (TM&C) system was previously introduced to resolve thermal problems related to prostheses. This study evaluates its clinical application in a setting with reversal, si…	perspiration; prosthetic socket; residual limb; skin; temperature control; temperature measurement; thermoregulatory system; transtibial amputation	Skin; Temperature control; Temperature measurement; Thermal comfort; perspiration; Prosthetic sockets; Residual limb; Thermoregulatory; transtibial amputation; Artificial limbs; amputation stump; amputee; devices; human; limb prosthesis; male; middle aged; pathophysiology; physiologic monitoring; physiology; procedures; prosthesis design; rehabilitation; skin temperature; surgery; thermometry; ti…	Article	Scopus
Otoom M., Alzubaidi M.A.	Ambient intelligence framework for real-time speech-to-sign translation	2018	Assistive Technology	2	https://www.scopus.com/inward/record.uri?eid=2-s2.0-85011568212&doi=10.1080%2f10400435.2016.1268218&partnerID=40&md5=4c63edd9009b115b07f3c9a4a4091e5a	Computer Engineering Department, Yarmouk University, Irbid, Jordan	Otoom, M., Computer Engineering Department, Yarmouk University, Irbid, Jordan; Alzubaidi, M.A., Computer Engineering Department, Yarmouk University, Irbid, Jordan	Sign language can be used to facilitate communication with and between deaf or hard of hearing (Deaf/HH). With the advent of video streaming applications in smart TVs and mobile devices, it is now possible to use sign language to communicate over worldwide networks. In this article, we develop a prototype assistive device for real-time speech-to-sign translation. The proposed device aims at enabl…	assistive devices; deaf; hard of hearing persons; machine learning; satisfaction; sign language; smartphones; streaming videos	Ambient intelligence; Artificial intelligence; Audition; Eye tracking; Learning systems; Smartphones; Video streaming; Assistive devices; deaf; Hard of hearings; satisfaction; Sign language; Streaming videos; Translation (languages); attention; eye tracking; hearing impaired person; human; intelligence; machine learning; satisfaction; sign language; smartphone; speech; videorecording; adolescent;…	Article	Scopus
Hochhauser M., Weiss P.L., Gal E.	Enhancing conflict negotiation strategies of adolescents with autism spectrum disorder using video modeling	2018	Assistive Technology	2	https://www.scopus.com/inward/record.uri?eid=2-s2.0-85011292262&doi=10.1080%2f10400435.2016.1268217&partnerID=40&md5=406f65c39e2b4109e65babd352232994	Dept. of Occupational Therapy, Faculty of Social Welfare and Health Sciences, University of Haifa, Haifa, Israel; Faculty of Health Sciences, Ariel University, Ariel, Israel	Hochhauser, M., Dept. of Occupational Therapy, Faculty of Social Welfare and Health Sciences, University of Haifa, Haifa, Israel, Faculty of Health Sciences, Ariel University, Ariel, Israel; Weiss, P.L., Dept. of Occupational Therapy, Faculty of Social Welfare and Health Sciences, University of Haifa, Haifa, Israel; Gal, E., Dept. of Occupational Therapy, Faculty of Social Welfare and Health Scie…	Adolescents with autism spectrum disorder (ASD) have particular difficulty in negotiating conflict. A randomized control trial (RCT) was carried out to determine whether the negotiation strategies of adolescents with ASD would be enhanced via a 6-week intervention based on a video modeling application. Adolescents with ASD, aged 12–18 years, were randomly divided into an intervention group (n = 3…	adolescents; autism spectrum disorder; conflict negotiation strategies; video modeling	Human rehabilitation equipment; adolescents; Autism spectrum disorders; Conflict negotiation; Control groups; Negotiation strategy; Randomized control trials; Video model; Diseases; adolescent; autism; behavior therapy; child; controlled study; female; human; interpersonal communication; male; procedures; psychological model; psychology; randomized controlled trial; randomized controlled trial (t…	Article	Scopus
Rosen L., Plummer T., Sabet A., Lange M.L., Livingstone R.	RESNA position on the application of power mobility devices for pediatric users	2018	Assistive Technology	8	https://www.scopus.com/inward/record.uri?eid=2-s2.0-85044459845&doi=10.1080%2f10400435.2017.1415575&partnerID=40&md5=34e92a6b96e610c3c7b01ec8f8058223	St. Joseph’s Children’s Hospital, Motion Analysis Center, Tampa, Florida, USA; Belmont University, Nashville, Tennessee, USA, United States; School of Health Sciences, Cleveland Clinic Children’s Hospital for Rehabilitation, Cleveland State University, Cleveland, Ohio, USA; Access to Independence, Arvada, Colorado, USA, United States; Sunny Hill Health Centre for Children, Vancouver, British Colu…	Rosen, L., St. Joseph’s Children’s Hospital, Motion Analysis Center, Tampa, Florida, USA; Plummer, T., Belmont University, Nashville, Tennessee, USA, United States; Sabet, A., School of Health Sciences, Cleveland Clinic Children’s Hospital for Rehabilitation, Cleveland State University, Cleveland, Ohio, USA; Lange, M.L., Access to Independence, Arvada, Colorado, USA, United States; Livingstone, R…	This paper serves as an update to the previous RESNA Position on the Application of Power Wheelchairs for Pediatric Users with more current and additional scientific literature. This document contains typical clinical applications and best evidence from the literature supporting the application of power mobility (PM) for young children and to assist practitioners in decision-making and justificat…	mobility; pediatric mobility; pediatric wheelchair; power wheelchair	Carrier mobility; Decision making; Patient rehabilitation; Wheelchairs; Clinical application; Manual wheelchair; Power mobility; Power wheelchair; Scientific literature; Social development; Young children; Pediatrics	Article in Press	Scopus
Weinstein M.L., Lloyd M., Finch K.A., Laszacs A.D.	Underappreciated challenges to pediatric powered mobility–Ways to address them as illustrated by a case report	2018	Assistive Technology	2	https://www.scopus.com/inward/record.uri?eid=2-s2.0-85013053219&doi=10.1080%2f10400435.2016.1257520&partnerID=40&md5=3cfa1bf22be426068ba9f65d2621bea7	Department of Surgery, Graduate School of Medicine, University of Tennessee-Knoxville, Knoxville, TN, United States; Patricia Neal Rehabilitation Center, Knoxville, TN, United States; University of Tennessee Health Science Center, College of Medicine, Memphis, TN, United States; University of Tennessee, Knoxville, TN, United States	Weinstein, M.L., Department of Surgery, Graduate School of Medicine, University of Tennessee-Knoxville, Knoxville, TN, United States; Lloyd, M., Patricia Neal Rehabilitation Center, Knoxville, TN, United States; Finch, K.A., University of Tennessee Health Science Center, College of Medicine, Memphis, TN, United States; Laszacs, A.D., University of Tennessee, Knoxville, TN, United States	Rehabilitation Engineering and Assistive Technology Society of North America (RESNA) has published a position paper strongly advocating powered mobility (PM) for children with severe physical limitations (Rosen et al., 2009). Many studies have established that there are gains in social skills and functional mobility. While PM can aid independence, there has been more emphasis on the improvements …	developmental disability; mobility; neuromuscular impairment; pediatrics; wheeled mobility aids	Carrier mobility; Insurance; Pediatrics; Assistive technology; Developmental disability; Functional communication; Functional mobility; Neuromuscular impairments; Physical limitations; Rehabilitation engineering; Wheeled mobility; Patient rehabilitation; age; case report; human; male; preschool child; quality of life; self help device; spinal dysraphism; walking difficulty; wheelchair; Age Factor…	Article	Scopus
Hillman S.J., Hollington J., Crossan N., Torres-Sánchez C.	Correlation of ISO 16840-2:2007 impact damping and hysteresis measures for a sample of wheelchair seating cushions	2018	Assistive Technology	4	https://www.scopus.com/inward/record.uri?eid=2-s2.0-85011838371&doi=10.1080%2f10400435.2016.1261963&partnerID=40&md5=5c92f23f1a91843c516eb75a011499fd	Rehabilitation Engineering and Aids for Living Unit, Newcastle upon Tyne Hospitals NHS Foundation Trust, Newcastle upon Tyne, United Kingdom; South-east Mobility and Rehabilitation Technology Centre, NHS Lothian, Edinburgh, United Kingdom; School of Engineering and Physical Sciences, Department of Mechanical Engineering, Heriot-Watt University, Edinburgh, United Kingdom; Wolfson School of Mechani…	Hillman, S.J., Rehabilitation Engineering and Aids for Living Unit, Newcastle upon Tyne Hospitals NHS Foundation Trust, Newcastle upon Tyne, United Kingdom; Hollington, J., South-east Mobility and Rehabilitation Technology Centre, NHS Lothian, Edinburgh, United Kingdom; Crossan, N., School of Engineering and Physical Sciences, Department of Mechanical Engineering, Heriot-Watt University, Edinburg…	Hysteresis and impact damping measures were made on 37 wheelchair seating cushions according to ISO 16840-2:2007 Wheelchair seating—Part 2: Determination of physical and mechanical characteristics of devices intended to manage tissue integrity—seat cushions. These measures were then correlated using Spearman and Pearson correlations to investigate the relationship between them. Correlations were …	mobility; positioning and support surfaces; seating; standards; wheelchair	Carrier mobility; Damping; Gears; Wheelchairs; Impact damping; Mechanical characteristics; Peak acceleration; Pearson correlation; Seat cushions; Support surfaces; Tissue integrity; Wheelchair seating; Hysteresis; equipment design; ergonomics; materials testing; physical phenomena; wheelchair; Equipment Design; Ergonomics; Materials Testing; Physical Phenomena; Wheelchairs	Article	Scopus
Haesner M., Chandra J., Steinert A., Steinhagen-Thiessen E.	An eye movement analysis of web usability: Differences between older adults with and without mild cognitive impairment	2018	Assistive Technology	1	https://www.scopus.com/inward/record.uri?eid=2-s2.0-85011601718&doi=10.1080%2f10400435.2016.1251994&partnerID=40&md5=42693be27f5e709c8b1cb259cdda4130	Geriatrics Research Group of the Charité, Universitätsmedizin Berlin, Berlin, Germany	Haesner, M., Geriatrics Research Group of the Charité, Universitätsmedizin Berlin, Berlin, Germany; Chandra, J., Geriatrics Research Group of the Charité, Universitätsmedizin Berlin, Berlin, Germany; Steinert, A., Geriatrics Research Group of the Charité, Universitätsmedizin Berlin, Berlin, Germany; Steinhagen-Thiessen, E., Geriatrics Research Group of the Charité, Universitätsmedizin Berlin, Ber…	Older adults are exposed to computer-based applications daily. However, most websites and applications are not specifically developed for older adults. Studies have shown that older adults with mild cognitive impairment (MCI) behave differently from older adults without MCI in website usage. Eye tracking is a valuable tool to assess users’ eye movement behavior in relation to website usability. U…	eye tracking; mild cognitive impairment; older adults; usability	Usability engineering; Websites; Computer-based applications; Eye movement analysis; Eye movement patterns; Eye-tracking; Mild cognitive impairments; Mild cognitive impairments (MCI); Older adults; usability; Eye movements; aged; cognitive defect; computer; eye movement; female; human; Internet; male; pathophysiology; physiologic monitoring; physiology; procedures; task performance; very elderly;…	Article	Scopus
Stansfield S., Dennis C., Altman R., Smith J., Larin H.	A comparison of the efficacy of weight-shift vs. joystick control of a robotic mobility device by infants ages 5 to 10 months	2018	Assistive Technology		https://www.scopus.com/inward/record.uri?eid=2-s2.0-85011563815&doi=10.1080%2f10400435.2016.1262479&partnerID=40&md5=8ff1b04f05866414d41707fb208f3d6a	Department of Computer Science, Ithaca College, Ithaca, NY, United States; Department of Occupational Therapy, Ithaca College, Ithaca, NY, United States; Department of Physical Therapy, Ithaca College, Ithaca, NY, United States	Stansfield, S., Department of Computer Science, Ithaca College, Ithaca, NY, United States; Dennis, C., Department of Occupational Therapy, Ithaca College, Ithaca, NY, United States; Altman, R., Department of Occupational Therapy, Ithaca College, Ithaca, NY, United States; Smith, J., Department of Occupational Therapy, Ithaca College, Ithaca, NY, United States; Larin, H., Department of Physical Th…	The onset of crawling in infants contributes to cognitive, perceptual, social, and emotional development. Conversely, infants with motor impairment that delays or prevents autonomous mobility often have associated developmental delays. Evidence suggests that providing mobility may have positive developmental outcomes, however powered wheelchairs may not be recommended for very young children, due…	mobility; pediatrics; robotics; wheeled mobility aids	Carrier mobility; Pediatrics; Wheelchairs; Autonomous mobilities; Children with disabilities; Developmental delay; Joystick control; Motor impairments; Powered wheel chairs; Robotic mobility; Wheeled mobility; Robotics; child; clinical article; comparative effectiveness; controlled study; experimental model; handicapped child; human; infant; normal human; pediatrics; robotics; body weight; child …	Article	Scopus
Lin S.C., Gold R.S.	Assistive technology needs, functional difficulties, and services utilization and coordination of children with developmental disabilities in the United States	2018	Assistive Technology	1	https://www.scopus.com/inward/record.uri?eid=2-s2.0-85011310439&doi=10.1080%2f10400435.2016.1265023&partnerID=40&md5=406deb3bd5ff143f8d0694945bc67e53	Department of Epidemiology and Biostatistics, School of Public Health, University of Maryland, College Park, MD, United States	Lin, S.C., Department of Epidemiology and Biostatistics, School of Public Health, University of Maryland, College Park, MD, United States; Gold, R.S., Department of Epidemiology and Biostatistics, School of Public Health, University of Maryland, College Park, MD, United States	Assistive technology (AT) enhances the ability of individuals with disabilities to be fully engaged in activities at home, at school, and within their communities—especially for children with developmental disabilities (DD) with physical, sensory, learning, and/or communication impairments. The prevalence of children with DD in the United States has risen from 12.84% in 1997 to 15.04% in 2008. Th…	assistive technology needs; children with developmental disabilities	Audition; Multivariant analysis; Assistive technology; Bivariate; Developmental disability; Multivariate statistical analysis; National surveys; Data communication equipment; child; cross-sectional study; developmental disorder; female; health service; human; infant; male; newborn; preschool child; self help device; United States; Child; Child, Preschool; Cross-Sectional Studies; Developmental Di…	Article	Scopus
Batterman J.M., Martin V.F., Yeung D., Walker B.N.	Connected cane: Tactile button input for controlling gestures of iOS voiceover embedded in a white cane	2018	Assistive Technology	6	https://www.scopus.com/inward/record.uri?eid=2-s2.0-85011256306&doi=10.1080%2f10400435.2016.1265024&partnerID=40&md5=677d4dbbdd9abc4b9f913f47181b2ab9	School of Psychology, Georgia Institute of Technology, Atlanta, GA, United States	Batterman, J.M., School of Psychology, Georgia Institute of Technology, Atlanta, GA, United States; Martin, V.F., School of Psychology, Georgia Institute of Technology, Atlanta, GA, United States; Yeung, D., School of Psychology, Georgia Institute of Technology, Atlanta, GA, United States; Walker, B.N., School of Psychology, Georgia Institute of Technology, Atlanta, GA, United States	Accessibility of assistive consumer devices is an emerging research area with potential to benefit both users with and without visual impairments. In this article, we discuss the research and evaluation of using a tactile button interface to control an iOS device’s native VoiceOver Gesture navigations (Apple Accessibility, 2014). This research effort identified potential safety and accessibility …	accessibility; cane; navigation; visual impairment; voiceover	Navigation; Patient rehabilitation; Transportation; accessibility; cane; Gesture navigation; Participatory design; Research and evaluation; Visual impairment; Visually impaired; voiceover; iOS (operating system); cane; equipment design; gesture; human; rehabilitation; self help device; sensory aid; visually impaired person; Canes; Equipment Design; Gestures; Humans; Self-Help Devices; Sensory Aid…	Article	Scopus
Nazemi A., Fernando C., Murray I., McMeekin D.A.	Access to all components of scanned mathematical documents by vision-impaired students	2018	Assistive Technology	1	https://www.scopus.com/inward/record.uri?eid=2-s2.0-85010644526&doi=10.1080%2f10400435.2016.1244129&partnerID=40&md5=86030dd338ad284519e09cd2ce70ffde	Department of Electrical and Computer Engineering, Curtin University, Perth, WA, Australia; Department of Spatial Science, Curtin University, Perth, WA, Australia	Nazemi, A., Department of Electrical and Computer Engineering, Curtin University, Perth, WA, Australia; Fernando, C., Department of Electrical and Computer Engineering, Curtin University, Perth, WA, Australia; Murray, I., Department of Electrical and Computer Engineering, Curtin University, Perth, WA, Australia; McMeekin, D.A., Department of Spatial Science, Curtin University, Perth, WA, Australia	Vision-impaired people access documents using screen readers. Electronic documents may contain non-textual components, non-linear components, and multidimensional components, such as mathematical expressions and graphs. These components create a number of accessibility issues for those who use screen readers as assistive technology. The research presented here describes mathematical information r…	communication; computer access; knowledge translation; vision-impaired	Communication; Students; Teaching; Assistive technology; Computer access; Electronic document; Knowledge translation; Mathematical expressions; Mathematical functions; Mathematical information; Vision impaired; Functions; communication aid; education; human; image processing; mathematics; questionnaire; translational research; visual disorder; visually impaired person; Communication Aids for Disa…	Article	Scopus
Routhier F., Lettre J., Miller W.C., Borisoff J.F., Keetch K., Mitchell I.M., CanWheel Research Team	Data logger technologies for manual wheelchairs: A scoping review	2018	Assistive Technology	5	https://www.scopus.com/inward/record.uri?eid=2-s2.0-85008157500&doi=10.1080%2f10400435.2016.1242516&partnerID=40&md5=5e633aa4be16fa36d313a83a890e3ed5	Department of Rehabilitation, Université Laval, Quebec City, QC, Canada; Centre for Interdisciplinary Research in Rehabilitation and Social Integration, Centre Intégré Universitaire de Santé et de Services Sociaux de la Capitale-Nationale, Institut de Réadaptation en Déficience Physique de Québec, Quebec City, QC, Canada; Department of Occupational Science and Occupational Therapy, and Rehabilita…	Routhier, F., Department of Rehabilitation, Université Laval, Quebec City, QC, Canada, Centre for Interdisciplinary Research in Rehabilitation and Social Integration, Centre Intégré Universitaire de Santé et de Services Sociaux de la Capitale-Nationale, Institut de Réadaptation en Déficience Physique de Québec, Quebec City, QC, Canada; Lettre, J., Centre for Interdisciplinary Research in Rehabili…	In recent years, studies have increasingly employed data logger technologies to record objective driving and physiological characteristics of manual wheelchair users. However, the technologies used offer significant differences in characteristics, such as measured outcomes, ease of use, and level of burden. In order to identify and describe the extent of published research activity that relies on…	data loggers; manual wheelchair; scoping review; wheelchair	Accelerometers; Data logger; Manual wheelchair; Physiological characteristics; Research activities; Scoping review; Sensing technology; Technological improvements; Wheelchair users; Wheelchairs; accelerometry; ambulatory monitoring; daily life activity; devices; disabled person; human; information processing; medical electronics; wheelchair; Accelerometry; Activities of Daily Living; Data Collect…	Article	Scopus
DiGiovine C.P., Donahue M., Bahr P., Bresler M., Klaesner J., Pagadala R., Burkhardt B., Grott R.	Rehabilitation engineers, technologists, and technicians: Vital members of the assistive technology team	2018	Assistive Technology	3	https://www.scopus.com/inward/record.uri?eid=2-s2.0-85058853353&doi=10.1080%2f10400435.2018.1454713&partnerID=40&md5=4d3d15acbddb756a1c1f1c88204808be	Occupational Therapy Division, The Ohio State University, Columbus, OH, United States; Stout Vocational Rehabilitation Institute, University of Wisconsin–Stout, Menomonie, WI, United States; College of Education, The University of Iowa, Iowa City, United States; AWT Rehabilitation Engineer East Quadrant, Georgia Vocational Rehabilitation Agency, Macon, GA, United States; Department of Radiology, …	DiGiovine, C.P., Occupational Therapy Division, The Ohio State University, Columbus, OH, United States; Donahue, M., Stout Vocational Rehabilitation Institute, University of Wisconsin–Stout, Menomonie, WI, United States; Bahr, P., College of Education, The University of Iowa, Iowa City, United States; Bresler, M., AWT Rehabilitation Engineer East Quadrant, Georgia Vocational Rehabilitation Agency…	The rehabilitation engineering professions include rehabilitation engineers, rehabilitation technologists / assistive technologists and rehabilitation technicians. The purpose of this white paper is to define the rehabilitation engineering professions, describe educational pathways for the field of rehabilitation engineering, and describe the role of the rehabilitation engineering professions in …		Engineers; Human rehabilitation engineering; Professional aspects; Engineering activities; Engineering knowledge; Evolutionary improvement; Professional organization; Professional standards; Rehabilitation engineering; Science and Technology; Stakeholder feedbacks; Engineering education	Article in Press	Scopus
Lorusso M.L., Biffi E., Molteni M., Reni G.	Exploring the learnability and usability of a near field communication-based application for semantic enrichment in children with language disorders	2018	Assistive Technology	6	https://www.scopus.com/inward/record.uri?eid=2-s2.0-85012277543&doi=10.1080%2f10400435.2016.1253046&partnerID=40&md5=de574a822771520579dc684bd082c173	Child Psychopathology Unit—Neuropsychology of Developmental Disorders, Scientific Institute, IRCCS Eugenio Medea, Bosisio Parini, Lecco, Italy; Bioengineering Lab, Scientific Institute, IRCCS Eugenio Medea, Bosisio Parini, Lecco, Italy	Lorusso, M.L., Child Psychopathology Unit—Neuropsychology of Developmental Disorders, Scientific Institute, IRCCS Eugenio Medea, Bosisio Parini, Lecco, Italy; Biffi, E., Bioengineering Lab, Scientific Institute, IRCCS Eugenio Medea, Bosisio Parini, Lecco, Italy; Molteni, M., Child Psychopathology Unit—Neuropsychology of Developmental Disorders, Scientific Institute, IRCCS Eugenio Medea, Bosisio P…	Recently, a few software applications (apps) have been developed to enhance vocabulary and conceptual networks to address the needs of children with language impairments (LI), but there is no evidence about their impact and their usability in therapy contexts. Here, we try to fill this gap presenting a system aimed at improving the semantic competence and the structural knowledge of children with…	children; language disorders; mobile technology; rehabilitation; tangible objects	Application programs; Human computer interaction; Patient rehabilitation; Semantics; children; Language disorders; Language impairments; Mobile Technology; Software applications; Structural knowledge; Tangible objects; The near field communication (NFC); Near field communication; computer interface; devices; human; language disability; learning; mobile application; outcome assessment; preschool c…	Article	Scopus
Ghoseiri K., Zheng Y.P., Leung A.K.L., Rahgozar M., Aminian G., Lee T.H., Safari M.R.	Temperature measurement and control system for transtibial prostheses: Functional evaluation	2018	Assistive Technology	8	https://www.scopus.com/inward/record.uri?eid=2-s2.0-84994807622&doi=10.1080%2f10400435.2016.1225850&partnerID=40&md5=8ded9f2a2db1a310c18cf3eec8b32e65	Department of Orthotics and Prosthetics, School of Rehabilitation Sciences, Hamadan University of Medical Sciences, Hamadan, Iran; Interdisciplinary Division of Biomedical Engineering, Faculty of Engineering, Hong Kong Polytechnic University, Kowloon, Hong Kong; Department of Orthotics and Prosthetics, University of Social Welfare and Rehabilitation Sciences, Tehran, Iran; Department of Biostatis…	Ghoseiri, K., Department of Orthotics and Prosthetics, School of Rehabilitation Sciences, Hamadan University of Medical Sciences, Hamadan, Iran, Interdisciplinary Division of Biomedical Engineering, Faculty of Engineering, Hong Kong Polytechnic University, Kowloon, Hong Kong, Department of Orthotics and Prosthetics, University of Social Welfare and Rehabilitation Sciences, Tehran, Iran; Zheng, Y.…	The accumulation of heat inside the prosthetic socket increases skin temperature and fosters perspiration, which consequently leads to high tissue stress, friction blister, discomfort, unpleasant odor, and decreased prosthesis suspension and use. In the present study, the prototype of a temperature measurement and control (TM&C) system was designed, fabricated, and functionally evaluated in a pha…	heat; perspiration; prosthetic socket; residual limb; skin; thermoregulatory system; transtibial amputation	Body fluids; Control systems; Heating; Physiology; Prosthetics; Silicones; Skin; Temperature measurement; Thermistors; perspiration; Prosthetic sockets; Residual limb; Thermoregulatory; transtibial amputation; Artificial limbs; amputation stump; amputee; biological model; human; limb prosthesis; pathophysiology; prosthesis design; rehabilitation; skin temperature; sweating; thermoregulation; tibi…	Article	Scopus
Molteni P., Hügle T., Hügle M., Nüesch C., Mündermann A.	Reduction in ulnar pressure distribution when walking with forearm crutches with a novel cuff design: Cross-sectional intervention study on the biomechanical efficacy of an ulnar recess	2018	Assistive Technology		https://www.scopus.com/inward/record.uri?eid=2-s2.0-84992476864&doi=10.1080%2f10400435.2016.1236045&partnerID=40&md5=9b6c43302626787cf25d3ae9c1ca9938	Clinic for Orthopaedics and Traumatology, University Hospital Basel, Basel, Switzerland; Department of Rheumatology, University Hospital Basel, Basel, Switzerland; Department of Computer Science, University of Freiburg, Freiburg im Breisgau, Germany; Clinic for Orthopaedics and Traumatology, University Hospital Basel, Basel, Switzerland; Department of Biomedical Engineering, University of Basel, …	Molteni, P., Clinic for Orthopaedics and Traumatology, University Hospital Basel, Basel, Switzerland; Hügle, T., Department of Rheumatology, University Hospital Basel, Basel, Switzerland; Hügle, M., Department of Computer Science, University of Freiburg, Freiburg im Breisgau, Germany; Nüesch, C., Clinic for Orthopaedics and Traumatology, University Hospital Basel, Basel, Switzerland, Department o…	Walking with crutches is an effective way of reducing the load on the lower extremity and is often indicated after injury or surgery. However, walking with forearm crutches with conventional cuffs can trigger symptoms including tenosynovitis in the biceps tendon, ulnar neuropraxia at the wrist, pain, or skin hematoma. The purpose of this study was to test the hypothesis that a crutch cuff design …	center of pressure; crutch walking; pressure distribution; ulnar recess	Human rehabilitation equipment; Center of pressure; Distal regions; High pressure; Intervention studies; Lower extremity; nocv1; Peak pressure; Soft tissue; ulnar recess; Pressure distribution; adult; adverse device effect; biomechanics; cross-sectional study; crutch; equipment design; female; forearm; gait; human; male; middle aged; physiology; standards; ulna; weight bearing; Adult; Biomechanic…	Article	Scopus
Tan P., Alant E.	Using peer-mediated instruction to support communication involving a student with autism during mathematics activities: A case study	2018	Assistive Technology	7	https://www.scopus.com/inward/record.uri?eid=2-s2.0-84990055815&doi=10.1080%2f10400435.2016.1223209&partnerID=40&md5=313448d0d10c9ea8ce79f3e045f9e8c8	School of Urban Education, University of Tulsa, Tulsa, OK, United States; Curriculum and Instruction, Indiana University, Bloomington, IN, United States	Tan, P., School of Urban Education, University of Tulsa, Tulsa, OK, United States; Alant, E., Curriculum and Instruction, Indiana University, Bloomington, IN, United States	This study employed an A-B singled subject design to explore the extent to which a peer-mediated intervention supported a first-grade student with autism’s usage both in purpose and frequency of a speech-generating device (SGD) during mathematics activities. The intervention involved teaching a peer without a disability to encourage the student with autism to use the SGD during partnered mathemat…	alternative and augmentative communication; autism; mathematics; peer-mediated; speech generating device	Mathematical techniques; Speech communication; Students; Teaching; Alternative and augmentative communication; autism; Implications for futures; peer-mediated; Speech generating devices; Spontaneous communication; Diseases; autism; child; child behavior; communication aid; education; human; male; mathematics; peer group; procedures; psychology; social competence; student; videorecording; Autism S…	Article	Scopus
Hsu T.-W., Yang S.-Y., Liu J.-T., Pan C.-T., Yang Y.-S.	The effect of cushion properties on skin temperature and humidity at the body-support interface	2018	Assistive Technology	5	https://www.scopus.com/inward/record.uri?eid=2-s2.0-84989247293&doi=10.1080%2f10400435.2016.1223208&partnerID=40&md5=094be1c535bbd48ea1a3afd00a8aa08e	Department of Rehabilitation Medicine, Fangliao General Hospital, Pingtung County, Taiwan; Department of Rehabilitation Medicine, Chi-Mei Medical Center (Yong Kang), Tainan City, Taiwan; Department of Rehabilitation Medicine, Chi-Mei Medical Center (Liou Ying), Tainan City, Taiwan; Department of Mechanical and Electromechanical Engineering, National Sun Yat-Sen University, Kaohsiung City, Taiwan;…	Hsu, T.-W., Department of Rehabilitation Medicine, Fangliao General Hospital, Pingtung County, Taiwan; Yang, S.-Y., Department of Rehabilitation Medicine, Chi-Mei Medical Center (Yong Kang), Tainan City, Taiwan; Liu, J.-T., Department of Rehabilitation Medicine, Chi-Mei Medical Center (Liou Ying), Tainan City, Taiwan; Pan, C.-T., Department of Mechanical and Electromechanical Engineering, Nationa…	The purpose of this study is to explore the effects of various cushions on skin temperature and moisture at the body–seat interface during a 2-hour period of continuous sitting. Seventy-eight participants were randomly assigned to sit on one of the three types of wheelchair cushions for unrelieved sitting for over 2 hours. Skin temperature and relative humidity (RH) were measured under the subjec…	seating; thermal properties; wheelchair cushions	Air; Moisture; Thermodynamic properties; Wheelchairs; Air filled rubber; Digital temperature; Ischial tuberosity; Moisture accumulation; Prolonged sitting; seating; Skin temperatures; Wheelchair cushions; Moisture control	Article	Scopus
Jamwal P.K., Hussain S., Mir-Nasiri N., Ghayesh M.H., Xie S.Q.	Tele-rehabilitation using in-house wearable ankle rehabilitation robot	2018	Assistive Technology	6	https://www.scopus.com/inward/record.uri?eid=2-s2.0-84989235999&doi=10.1080%2f10400435.2016.1230153&partnerID=40&md5=5a717de6612f3429c3bed1f0cb612595	Department of Electrical and Electronics Engineering, School of Engineering, Nazarbayev University, Astana, Kazakhstan; School of Mechanical, Materials and Mechatronic Engineering, University of Wollongong, Wollongong, NSW, Australia; School of Mechanical Engieering, University of Adelaide, Adelaide, SA, Australia; Department of Mechanical Engineering, The University of Auckland, Auckland, New Ze…	Jamwal, P.K., Department of Electrical and Electronics Engineering, School of Engineering, Nazarbayev University, Astana, Kazakhstan; Hussain, S., School of Mechanical, Materials and Mechatronic Engineering, University of Wollongong, Wollongong, NSW, Australia; Mir-Nasiri, N., Department of Electrical and Electronics Engineering, School of Engineering, Nazarbayev University, Astana, Kazakhstan; G…	This article explores wide-ranging potential of the wearable ankle robot for in-house rehabilitation. The presented robot has been conceptualized following a brief analysis of the existing technologies, systems, and solutions for in-house physical ankle rehabilitation. Configuration design analysis and component selection for ankle robot have been discussed as part of the conceptual design. The c…	air muscles; ankle rehabilitation; parallel robot; tele-rehabilitation	Conceptual design; Digital libraries; Fuzzy logic; Graphical user interfaces; Haptic interfaces; Human robot interaction; Machine design; Modular robots; Robots; User interfaces; Virtual reality; Wearable technology; Ankle rehabilitation robots; Component selection; Configuration designs; Fuzzy logic based controller; Graphical user interfaces (GUI); Parallel robots; Rehabilitation robot; Web-bas…	Article	Scopus
Humphreys H.C., Choi Y.M., Book W.J.	Advanced patient transfer assist device with intuitive interaction control	2017	Assistive Technology	1	https://www.scopus.com/inward/record.uri?eid=2-s2.0-85035323067&doi=10.1080%2f10400435.2017.1396564&partnerID=40&md5=2c0c6fbbc07b118c0e12e72ca517738d	School of Mechanical Engineering, Georgia Institute of Technology, Atlanta, Georgia, USA, United States; School of Industrial Design, Georgia Institute of Technology, Atlanta, Georgia, USA, United States	Humphreys, H.C., School of Mechanical Engineering, Georgia Institute of Technology, Atlanta, Georgia, USA, United States; Choi, Y.M., School of Industrial Design, Georgia Institute of Technology, Atlanta, Georgia, USA, United States; Book, W.J., School of Mechanical Engineering, Georgia Institute of Technology, Atlanta, Georgia, USA, United States	This research aims to improve patient transfers by developing a new type of advanced robotic assist device. It has multiple actuated degrees of freedom and a powered steerable base to maximize maneuverability around obstacles. An intuitive interface and control strategy allows the caregiver to simply push on the machine in the direction of desired patient motion. The control integrates measuremen…	assessment; environmental modifications; robotics; usability	Degrees of freedom (mechanics); Hydraulic machinery; Robotics; Subjective testing; assessment; Control strategies; Electro-hydraulics; environmental modifications; Interaction controls; Intuitive interaction; Intuitive interfaces; usability; Fiber optic sensors	Article in Press	Scopus
Alkhateeb A.M., Forrester B.J., Daher N.S., Martin B.D., Alonazi A.A.	Validity and reliability of wheelchair sitting posture measures using Coach’s Eye in abled subjects	2017	Assistive Technology	3	https://www.scopus.com/inward/record.uri?eid=2-s2.0-84992512837&doi=10.1080%2f10400435.2016.1220994&partnerID=40&md5=5526524f532c2e4ca354b681a2983980	Department of Physical Therapy, School of Allied Health Professions, Loma Linda University, Loma Linda, CA, United States; Physical Therapy Department, Faculty of Applied Medical Sciences, King Abdulaziz University, Jeddah, Saudi Arabia; Department of Allied Health Studies, School of Allied Health Professions, Loma Linda University, Loma Linda, CA, United States	Alkhateeb, A.M., Department of Physical Therapy, School of Allied Health Professions, Loma Linda University, Loma Linda, CA, United States, Physical Therapy Department, Faculty of Applied Medical Sciences, King Abdulaziz University, Jeddah, Saudi Arabia; Forrester, B.J., Department of Physical Therapy, School of Allied Health Professions, Loma Linda University, Loma Linda, CA, United States; Dahe…	People in wheelchairs spend a long time in the sitting position and often incur alignment problems resulting in neck and back pain. This study: (1) assessed the validity/reliability of Coach’s Eye (CE) smart device application, (2) examined the effect of seat to back support angle adjustments on head, neck, and shoulder posture in the sitting position, and (3) compared changes in cervical rotatio…	cervical angle; Coach’s Eye; sagittal head angle; seat to back support angle of wheelchair; shoulder angle; sitting posture	Ergonomics; Back supports; cervical angle; Head angle; Shoulder angle; Sitting posture; Wheelchairs; adolescent; adult; backache; body position; cross-sectional study; disabled person; female; human; male; middle aged; neck pain; physiology; software; standards; validation study; wheelchair; young adult; Adolescent; Adult; Back Pain; Cross-Sectional Studies; Disabled Persons; Female; Humans; Male…	Article	Scopus
Vorrink S.N.W., Antonietti A.M.G.E.F., Kort H.S.M., Troosters T., Zanen P., Lammers J.-W.J.	Technology use by older adults in the Netherlands and its associations with demographics and health outcomes	2017	Assistive Technology	11	https://www.scopus.com/inward/record.uri?eid=2-s2.0-84989925624&doi=10.1080%2f10400435.2016.1219885&partnerID=40&md5=9a29e292e989417b153a006eda9b3aa3	Centre for Innovation in Healthcare, Research Group Demand Driven Care, Utrecht University of Applied Sciences, Utrecht, Netherlands; Department of the Built Environment, Eindhoven University of Technology, Eindhoven, Netherlands; Research Group for Cardiovascular and Respiratory Rehabilitation, Department of Rehabilitation Sciences, KU Leuven–University of Leuven, Leuven, Belgium; Respiratory Di…	Vorrink, S.N.W., Centre for Innovation in Healthcare, Research Group Demand Driven Care, Utrecht University of Applied Sciences, Utrecht, Netherlands; Antonietti, A.M.G.E.F., Centre for Innovation in Healthcare, Research Group Demand Driven Care, Utrecht University of Applied Sciences, Utrecht, Netherlands; Kort, H.S.M., Centre for Innovation in Healthcare, Research Group Demand Driven Care, Utre…	Information and communications technology (ICT) has the potential to contribute to the quality of life of older adults. The aim of this study was to analyze the use of a broad array of ICT devices and services among Dutch older adults and to determine whether demographics and health outcomes are associated with this use. A questionnaire was dispensed among a group of Dutch older adults (≥65 years…	information technology and telecommunications; older adults; universal design	Regression analysis; Surveys; Confidence interval; Health outcomes; Information and communications technology; Older adults; Physical functioning; Physical restriction; Univariate analysis; Universal Design; Population statistics; aged; demography; female; human; information technology; male; Netherlands; outcome assessment; questionnaire; telecommunication; utilization; Aged; Demography; Female;…	Article	Scopus
Schwartz J.K.	Pillbox use, satisfaction, and effectiveness among persons with chronic health conditions	2017	Assistive Technology	8	https://www.scopus.com/inward/record.uri?eid=2-s2.0-84989260722&doi=10.1080%2f10400435.2016.1219884&partnerID=40&md5=57a2249656e6b5b5d26faac0d4223c91	Department of Occupational Therapy, Nicole Wertheim College of Nursing & Health Sciences, Florida International University, Miami, FL, United States	Schwartz, J.K., Department of Occupational Therapy, Nicole Wertheim College of Nursing & Health Sciences, Florida International University, Miami, FL, United States	The purpose of this study was to understand how persons with chronic health conditions use pillboxes, their satisfaction with current devices, and the impact of pillbox use on medication adherence. We used convergent parallel mixed methods approach to explore the experiences of 13 regular, 3 occasional, and 5 non-pillbox users. Medication consumers completed the Quebec User Evaluation of Satisfac…	assistive technology; household article; medication adherence; rehabilitation	Patient rehabilitation; Assistive technology; Health condition; household article; Improved designs; Medication adherence; Medication regimen; Mixed method; User evaluations; Human rehabilitation equipment; assistive technology; consumer; habit; household; human; human experiment; interview; medication compliance; prescription; Quebec; adult; aged; chronic disease; devices; drug packaging; female…	Article	Scopus
Dowling A.V., Eberly V., Maneekobkunwong S., Mulroy S.J., Requejo P.S., Gwin J.T.	Telehealth monitor to measure physical activity and pressure relief maneuver performance in wheelchair users	2017	Assistive Technology	1	https://www.scopus.com/inward/record.uri?eid=2-s2.0-84989257147&doi=10.1080%2f10400435.2016.1220993&partnerID=40&md5=2808953c514aae2daafb3439ae231717	BioSensics LLC, Cambridge, MA, United States; Pathokinesiology Laboratory, Rancho Los Amigos National Rehabilitation Center, Downey, CA, United States	Dowling, A.V., BioSensics LLC, Cambridge, MA, United States; Eberly, V., Pathokinesiology Laboratory, Rancho Los Amigos National Rehabilitation Center, Downey, CA, United States; Maneekobkunwong, S., Pathokinesiology Laboratory, Rancho Los Amigos National Rehabilitation Center, Downey, CA, United States; Mulroy, S.J., Pathokinesiology Laboratory, Rancho Los Amigos National Rehabilitation Center, …	This study demonstrated the feasibility of a device for monitoring pressure relief maneuvers and physical activity for wheelchair users. The device counts the number of wheel pushes based on wheelchair acceleration and measures pressure relief maneuvers using a seat sensor consisting of three force sensing resistors (FSRs). To establish the feasibility of the seat sensor for the detection of pres…	accelerometer; activity monitor; pressure relief; wheelchair	Accelerometers; Medical computing; Propulsion; Wheels; Activity monitors; Force sensing resistor; Physical activity; Pressure relief; Seat cushions; Self propulsion; Telehealth; Wheelchair users; Wheelchairs; accelerometry; adult; devices; exercise; feasibility study; human; male; middle aged; physiologic monitoring; physiology; telecommunication; wheelchair; Accelerometry; Adult; Exercise; Feasi…	Article	Scopus
Goto K., Morishita T., Kamada S., Saita K., Fukuda H., Shiota E., Sankai Y., Inoue T.	Feasibility of rehabilitation using the single-joint hybrid assistive limb to facilitate early recovery following total knee arthroplasty: A pilot study	2017	Assistive Technology	8	https://www.scopus.com/inward/record.uri?eid=2-s2.0-84989220558&doi=10.1080%2f10400435.2016.1219883&partnerID=40&md5=413e9f5c8b19a4eb0a48ba752ecddfe1	Department of Neurosurgery, Fukuoka University Faculty of Medicine, Fukuoka, Japan; Department of Rehabilitation Medicine, Fukuoka University Faculty of Medicine, Fukuoka, Japan; Department of Orthopedic Surgery, Fukuoka University Faculty of Medicine, Fukuoka, Japan; Graduate School of Systems and Information Engineering, Center for Cybernics Research, University of Tsukuba, Ibaraki, Japan	Goto, K., Department of Neurosurgery, Fukuoka University Faculty of Medicine, Fukuoka, Japan, Department of Rehabilitation Medicine, Fukuoka University Faculty of Medicine, Fukuoka, Japan; Morishita, T., Department of Neurosurgery, Fukuoka University Faculty of Medicine, Fukuoka, Japan; Kamada, S., Department of Rehabilitation Medicine, Fukuoka University Faculty of Medicine, Fukuoka, Japan, Depa…	We aimed to evaluate the feasibility of robot-assisted rehabilitation in an early postoperative setting to improve knee mobility following total knee arthroplasty (TKA). A total of 20 patients were alternatively assigned to robotassisted rehabilitation (n = 10; all women) or a control group (n = 10; 2 men and 8 women). The use of a single-joint hybrid assistive limb (HAL-SJ) in active assistive k…	hybrid assistive limb (HAL); quadriceps arthrogenic inhibition; robot; total knee arthroplasty (TKA)	Arthroplasty; Fighter aircraft; Joints (anatomy); Orthopedics; Robots; Active movements; Control groups; Hybrid assistive limbs; Knee extension; Pilot studies; Robot-assisted rehabilitation; Total knee arthroplasty; Visual analog scale; Patient rehabilitation; clinical article; control group; controlled study; exercise; feasibility study; female; human; knee surgery; male; normal human; pilot stu…	Article	Scopus
Sasaki K., Rispin K.	Assessment of physiological performance and perception of pushing different wheelchairs on indoor modular units simulating a surface roughness often encountered in under-resourced settings	2017	Assistive Technology		https://www.scopus.com/inward/record.uri?eid=2-s2.0-84988350396&doi=10.1080%2f10400435.2016.1216473&partnerID=40&md5=c389ae3e7ef3aab2897ec3933ac68cda	School of Engineering and Engineering Technology, LeTourneau University, Longview, TX, United States; Department of Biology, LeTourneau University, Longview, TX, United States	Sasaki, K., School of Engineering and Engineering Technology, LeTourneau University, Longview, TX, United States; Rispin, K., Department of Biology, LeTourneau University, Longview, TX, United States	In under-resourced settings where motorized wheelchairs are rarely available, manual wheelchair users with limited upper-body strength and functionalities need to rely on assisting pushers for their mobility. Because traveling surfaces in under-resourced settings are often unpaved and rough, wheelchair pushers could experience high physiological loading. In order to evaluate pushers’ physiologica…	assistant; energy cost; rolling resistance; rough surface; wheelchair	Physiology; Rolling resistance; Surface measurement; Surface roughness; assistant; Energy cost; Healthy subjects; Manual wheelchair; Motorized wheelchairs; Physiological loadings; Rough surfaces; Wheelchair designs; Wheelchairs; disabled person; equipment design; exercise; human; physiology; poverty; task performance; upper limb; wheelchair; Disabled Persons; Equipment Design; Humans; Physical Ex…	Article	Scopus
Thompson R., Tanimoto S., Abbott R., Nielsen K., Lyman R.D., Geselowitz K., Habermann K., Mickail T., Raskind M., Peverly S., Nagy W., Berninger V.	Relationships between language input and letter output modes in writing notes and summaries for students in grades 4 to 9 with persisting writing disabilities	2017	Assistive Technology	5	https://www.scopus.com/inward/record.uri?eid=2-s2.0-84990224581&doi=10.1080%2f10400435.2016.1199066&partnerID=40&md5=52120ec9d77033c8d80582b50bb80bfb	Computer Science and Engineering, University of Washington, Seattle, WA, United States; Quantitative Studies and Measurement, University of Washington, Seattle, WA, United States; Learning Sciences and Human Development, University of Washington, Seattle, WA, United States; Teacher Education, University of Washington, Seattle, WA, United States; Department of Psychology, University of Washington,…	Thompson, R., Computer Science and Engineering, University of Washington, Seattle, WA, United States; Tanimoto, S., Computer Science and Engineering, University of Washington, Seattle, WA, United States; Abbott, R., Quantitative Studies and Measurement, University of Washington, Seattle, WA, United States; Nielsen, K., Learning Sciences and Human Development, University of Washington, Seattle, WA…	This study in programmatic research on technology-supported instruction first identified, through pretesting using evidence-based criteria, students with persisting specific learning disabilities (SLDs) in written language during middle childhood (grades 4–6) and early adolescence (grades 7–9). Participants then completed computerized writing instruction and posttesting. The 12 computer lessons v…	handwriting; idea units; keyboarding; listening to sources; note-taking; reading sources; writing summaries	handwriting; idea units; keyboarding; Note taking; Production outputs; Technology supported instructions; Writing disabilities; Writing instruction; Human rehabilitation equipment; adolescent; child; communication disorder; handwriting; human; language; pathophysiology; reading; self help device; student; Adolescent; Child; Communication Disorders; Handwriting; Humans; Language; Reading; Self-Hel…	Article	Scopus
Bryant B.R., Seok S.	Introduction to the special series: Technology and disabilities in education	2017	Assistive Technology	1	https://www.scopus.com/inward/record.uri?eid=2-s2.0-84989257385&doi=10.1080%2f10400435.2016.1230154&partnerID=40&md5=bbfa41cace149b842a42e5f418eb0e44	Meadows Center for Preventing Educational Risk, The University of Texas at Austin, Austin, TX, United States; Department of Curriculum and Instruction, College of Education, Texas State University, San Marcos, TX, United States	Bryant, B.R., Meadows Center for Preventing Educational Risk, The University of Texas at Austin, Austin, TX, United States; Seok, S., Department of Curriculum and Instruction, College of Education, Texas State University, San Marcos, TX, United States	In the nearly 30 years since the passage of the Technology-Related Assistance to Individuals with Disabilities Act of 1988, technology-mediated instruction has been implemented successfully with both students without disabilities and students with a range of disabilities to help them meet the demands of instruction. In this special issue of Assistive Technology, a number of noted scholars contrib…		Assistive; Assistive technology; Growing bodies; Instructional technology; Human rehabilitation equipment; disabled person; education; human; self help device; Disabled Persons; Education, Special; Humans; Self-Help Devices	Editorial	Scopus
Hensley K., Rankin A., Hosp J.	Comparing student performance on paper- and computer-based math curriculum-based measures	2017	Assistive Technology	2	https://www.scopus.com/inward/record.uri?eid=2-s2.0-84988311349&doi=10.1080%2f10400435.2016.1212129&partnerID=40&md5=093799544da3d88665286e4947fb05c5	Department of Special Education, Minnesota State University Mankato, Mankato, MN, United States; Department of Psychology and Quantitative Foundations, The University of Iowa, Iowa City, IA, United States; Department of Student Development, The University of Massachusetts Amherst, Amherst, MA, United States	Hensley, K., Department of Special Education, Minnesota State University Mankato, Mankato, MN, United States; Rankin, A., Department of Psychology and Quantitative Foundations, The University of Iowa, Iowa City, IA, United States; Hosp, J., Department of Student Development, The University of Massachusetts Amherst, Amherst, MA, United States	As the number of computerized curriculum-based measurement (CBM) tools increases, it is necessary to examine whether or not student performance can generalize across a variety of test administration modes (i.e., paper or computer). The purpose of this study is to compare math fact fluency on paper versus computer for 197 upper elementary students. Students completed identical sets of probes on pa…	computer-based assessments; curriculum-based measurement; mode effects	Curricula; Probes; Administration modes; Computer-based assessments; Elementary students; Mode effects; Potential difference; Student performance; Student supports; Students; controlled study; curriculum; DNA probe; elementary student; finger; human; major clinical study; potential difference; child; education; mathematics; procedures; statistics and numerical data; student; teaching; Child; Comp…	Article	Scopus
Seok S., DaCosta B.	Digital literacy of youth and young adults with intellectual disability predicted by support needs and social maturity	2017	Assistive Technology	1	https://www.scopus.com/inward/record.uri?eid=2-s2.0-84984688873&doi=10.1080%2f10400435.2016.1165759&partnerID=40&md5=e5be79de9688f35258b3dc8c6200c94c	Department of Education, Korea University, Seoul, South Korea; Solers Research Group, Orlando, FL, United States	Seok, S., Department of Education, Korea University, Seoul, South Korea; DaCosta, B., Solers Research Group, Orlando, FL, United States	This study investigated relationships between digital propensity and support needs as well as predictors of digital propensity in the context of support intensity, age, gender, and social maturity. A total of 118 special education teachers rated the support intensity, digital propensity, and social maturity of 352 students with intellectual disability. Leveraging the Digital Propensity Index, Sup…	digital propensity; intellectual disability; support intensity; support needs	Regression analysis; Descriptive statistics; Digital literacies; digital propensity; Intellectual disability; Intensity scale; Multiple regressions; Special education; Young adults; Teaching; adolescent; adult; female; human; human computer interaction; intellectual impairment; male; pathophysiology; social support; statistics and numerical data; young adult; Adolescent; Adult; Computer Literacy;…	Article	Scopus
Gevarter C., O’Reilly M.F., Kuhn M., Watkins L., Ferguson R., Sammarco N., Rojeski L., Sigafoos J.	Assessing the acquisition of requesting a variety of preferred items using different speech generating device formats for children with autism spectrum disorder	2017	Assistive Technology	5	https://www.scopus.com/inward/record.uri?eid=2-s2.0-84983786118&doi=10.1080%2f10400435.2016.1143411&partnerID=40&md5=73ae29e2a14f9aaca9cc3a2a7cc183f3	Special Education Department, The University of Texas at Austin, Austin, TX, United States; Department of Education, Victoria University of Wellington, Wellington, New Zealand	Gevarter, C., Special Education Department, The University of Texas at Austin, Austin, TX, United States; O’Reilly, M.F., Special Education Department, The University of Texas at Austin, Austin, TX, United States; Kuhn, M., Special Education Department, The University of Texas at Austin, Austin, TX, United States; Watkins, L., Special Education Department, The University of Texas at Austin, Austi…	Five children with autism spectrum disorder (ASD) were taught to request preferred items using four different augmentative and alternative communication (AAC) displays on an iPad®-based speech-generating device (SGD). Acquisition was compared using multi-element designs. Displays included a symbol-based grid, a photo image with embedded hotspots, a hybrid (photo image with embedded hotspots and s…	autism spectrum disorder; comparison of displays; iPad®; requesting; speech-generating device	Diseases; Hand held computers; Human rehabilitation engineering; Speech; Speech communication; Augmentative-and-alternative communication; Autism spectrum disorders; Children with autisms; Display effect; Multi-element; Photo images; requesting; Speech generating devices; Display devices; autism; child; communication aid; female; human; male; preschool child; speech disorder; Autism Spectrum Diso…	Article	Scopus
Park H.J., Takahashi K., Roberts K.D., Delise D.	Effects of text-to-speech software use on the reading proficiency of high school struggling readers	2017	Assistive Technology	1	https://www.scopus.com/inward/record.uri?eid=2-s2.0-84983775711&doi=10.1080%2f10400435.2016.1171808&partnerID=40&md5=07672ea9fd2a9cf05dc3bfc5ff87d190	Center on Disability Studies, University of Hawaii Manoa, Honolulu, HI, United States	Park, H.J., Center on Disability Studies, University of Hawaii Manoa, Honolulu, HI, United States; Takahashi, K., Center on Disability Studies, University of Hawaii Manoa, Honolulu, HI, United States; Roberts, K.D., Center on Disability Studies, University of Hawaii Manoa, Honolulu, HI, United States; Delise, D., Center on Disability Studies, University of Hawaii Manoa, Honolulu, HI, United States	The literature highlights the benefits of text-to-speech (TTS) software when used as an assistive technology facilitating struggling readers’ access to print. However, the effects of TTS software use, upon students’ unassisted reading proficiency, have remained relatively unexplored. The researchers utilized an experimental design to investigate whether 9th grade struggling readers who use TTS so…	adolescent struggling reader; assistive technology; intervention; reading; text-to-speech	Curricula; Students; Assistive technology; Course material; High school; Reading comprehension; Reading performance; Reading proficiency; Software use; Text to speech; Teaching; adolescent; analysis of covariance; assistive technology; comprehension; computer program; experimental design; Hawaii; high school; human; linguistics; major clinical study; scientist; speech; student; teacher; communica…	Article	Scopus
Rodríguez C.D., Cumming T.M.	Employing mobile technology to improve language skills of young students with language-based disabilities	2017	Assistive Technology	8	https://www.scopus.com/inward/record.uri?eid=2-s2.0-84983738762&doi=10.1080%2f10400435.2016.1171810&partnerID=40&md5=fc67c6b95088286ec475bbe379c88c69	Special Education Program, California State University Monterey Bay, Seaside, CA, United States; School of Education, University of New South Wales, Sydney, Australia	Rodríguez, C.D., Special Education Program, California State University Monterey Bay, Seaside, CA, United States; Cumming, T.M., School of Education, University of New South Wales, Sydney, Australia	This exploratory study investigated the effects of a language building iPad application on the language skills (i.e., receptive vocabulary, expressive vocabulary, and sentence formation) of young students with language-based disabilities. The study utilized a pre-test–post-test control group design. Students in the treatment group used the iPad language building application, Language Builder, for…	elementary school; instructional technology; iPad; language; language-based disabilities; mobile technology; special education	Computational linguistics; Education; Hand held computers; Speed control; Telecommunication equipment; Elementary schools; Instructional technology; iPad; language; language-based disabilities; Mobile Technology; Special education; Students; child; developmental language disorder; devices; female; human; language therapy; male; mobile application; personal digital assistant; procedures; student; …	Article	Scopus
Frontera W.R., Bean J.F., Damiano D., Ehrlich-Jones L., Fried-Oken M., Jette A., Jung R., Lieber R.L., Malec J.F., Mueller M.J., Ottenbacher K.J., Tansey K.E., Thompson A.	Rehabilitation research at the National Institutes of Health: Moving the field forward (Executive Summary)	2017	Assistive Technology	2	https://www.scopus.com/inward/record.uri?eid=2-s2.0-85021161197&doi=10.1080%2f10400435.2017.1306412&partnerID=40&md5=feb0637c41a2b147adea08b7427b63e3	Department of Physical Medicine and Rehabilitation, Vanderbilt University Medical Center, Nashville, TN, United States; Department of Physical Medicine, Rehabilitation, and Sports Medicine, University of Puerto Rico School of MedicineSan Juan, Puerto Rico; Department of Physical Medicine and Rehabilitation, Harvard Medical School, Boston, MA, United States; New England GRECC, VA Boston Healthcare…	Frontera, W.R., Department of Physical Medicine and Rehabilitation, Vanderbilt University Medical Center, Nashville, TN, United States, Department of Physical Medicine, Rehabilitation, and Sports Medicine, University of Puerto Rico School of MedicineSan Juan, Puerto Rico; Bean, J.F., Department of Physical Medicine and Rehabilitation, Harvard Medical School, Boston, MA, United States, New England…	[No abstract available]		human; national health organization; organization and management; procedures; rehabilitation research; trends; United States; Humans; National Institutes of Health (U.S.); Rehabilitation Research; United States	Article	Scopus
NIH Medical Rehabilitation Coordinating Committee	National Institutes of Health research plan on rehabilitation	2017	Assistive Technology	2	https://www.scopus.com/inward/record.uri?eid=2-s2.0-85021134016&doi=10.1080%2f10400435.2017.1306411&partnerID=40&md5=30077625568e3bdcb46abf0741f70a24	U.S. Department of Health and Human Services, National Institutes of Health, Bethesda, MD, United States	NIH Medical Rehabilitation Coordinating Committee	One in five Americans experiences disability that affects their daily function because of impairments in mobility, cognitive function, sensory impairment, or communication impairment. The need for rehabilitation strategies to optimize function and reduce disability is a clear priority for research to address this public health challenge. The National Institutes of Health (NIH) recently published …	disability; functional impairment; rehabilitation; research priorities	Medical problems; Patient rehabilitation; Advisory boards; Cognitive functions; disability; functional impairment; National Institutes of Health; Rehabilitation strategy; Research priorities; Sensory impairment; Health; disabled person; human; methodology; national health organization; rehabilitation; rehabilitation research; United States; Disabled Persons; Humans; National Institutes of Health …	Article	Scopus
Jones M., Mueller J., Morris J.	App Factory: A flexible approach to rehabilitation engineering in an era of rapid technology advancement	2017	Assistive Technology	2	https://www.scopus.com/inward/record.uri?eid=2-s2.0-85017509637&doi=10.1080%2f10400435.2016.1211201&partnerID=40&md5=aa05c79a7d6247f8f56f1a7cc756ebe7	Rehabilitation Engineering Research Center for Wireless Technologies (Wireless RERC), Shepherd Center, Atlanta, GA, United States	Jones, M., Rehabilitation Engineering Research Center for Wireless Technologies (Wireless RERC), Shepherd Center, Atlanta, GA, United States; Mueller, J., Rehabilitation Engineering Research Center for Wireless Technologies (Wireless RERC), Shepherd Center, Atlanta, GA, United States; Morris, J., Rehabilitation Engineering Research Center for Wireless Technologies (Wireless RERC), Shepherd Center…	This article describes a flexible and effective approach to research and development in an era of rapid technological advancement. The approach relies on secondary dispersal of grant funds to commercial developers through a competitive selection process. This “App Factory” model balances the practical reliance on multi-year funding needed to sustain a rehabilitation engineering research center (R…	emerging trends; information technology and telecommunications; knowledge translation; universal design; usability	Cost effectiveness; Emerging trends; Knowledge translation; Rehabilitation engineering; Research and development; Technological advancement; Technology advancement; Universal Design; usability; Human rehabilitation engineering; assistive technology; information technology; rehabilitation; telecommunication; devices; human; medical informatics; mobile application; mobile phone; procedures; rehabil…	Article	Scopus
Boerema S.T., van Velsen L., Vollenbroek-Hutten M.M.R., Hermens H.J.	Value-based design for the elderly: An application in the field of mobility aids	2017	Assistive Technology	8	https://www.scopus.com/inward/record.uri?eid=2-s2.0-84990981824&doi=10.1080%2f10400435.2016.1208303&partnerID=40&md5=68b13ac7cb2fda57721381f481fd1d32	Telemedicine Group, Roessingh Research and Development, Roessingsbleekweg, Enschede, Netherlands; Telemedicine Group, Faculty of Electrical Engineering, Mathematics and Computer Science, University of Twente, Drienerlolaan, Enschede, Netherlands	Boerema, S.T., Telemedicine Group, Roessingh Research and Development, Roessingsbleekweg, Enschede, Netherlands, Telemedicine Group, Faculty of Electrical Engineering, Mathematics and Computer Science, University of Twente, Drienerlolaan, Enschede, Netherlands; van Velsen, L., Telemedicine Group, Roessingh Research and Development, Roessingsbleekweg, Enschede, Netherlands, Telemedicine Group, Fac…	In the aging society, the need for the elderly to remain mobile and independent is higher than ever. However, many aids supporting mobility often fail to target real needs and lack acceptance. The aim of this study is to demonstrate how value-based design can contribute to the design of mobility aids that address real needs and thus, lead to high acceptance. We elicited values, facilitators, and …	acceptance; assessment; mind maps; mobility; older adults; usefulness; values; wheeled mobility aids	Carrier mobility; Human rehabilitation equipment; acceptance; assessment; Mind maps; Older adults; usefulness; values; Wheeled mobility; Product design; aged; female; fitness; human; interview; male; patient attitude; self help device; very elderly; walker; walking difficulty; Aged; Aged, 80 and over; Female; Humans; Interviews as Topic; Male; Mobility Limitation; Patient Acceptance of Health Car…	Article	Scopus
Frank A.O., De Souza L.H.	Problematic clinical features of children and adults with cerebral palsy who use electric powered indoor/outdoor wheelchairs: A cross-sectional study	2017	Assistive Technology	3	https://www.scopus.com/inward/record.uri?eid=2-s2.0-84990240845&doi=10.1080%2f10400435.2016.1201873&partnerID=40&md5=d07e84161d950b0633d4d6485386ccc1	Stanmore Specialist Wheelchair Service, Royal National Orthopaedic Hospital, Brockley Hill, Stanmore, United Kingdom; Department of Clinical Sciences, College of Health and Life Sciences, Brunel University London, Uxbridge, Middlesex, United Kingdom; Department of Clinical Sciences, College of Health and Life Sciences, Brunel University London, Uxbridge, Middlesex, United Kingdom	Frank, A.O., Stanmore Specialist Wheelchair Service, Royal National Orthopaedic Hospital, Brockley Hill, Stanmore, United Kingdom, Department of Clinical Sciences, College of Health and Life Sciences, Brunel University London, Uxbridge, Middlesex, United Kingdom; De Souza, L.H., Department of Clinical Sciences, College of Health and Life Sciences, Brunel University London, Uxbridge, Middlesex, Un…	This article aims to describe the clinical features of electric powered indoor/outdoor wheelchair (EPIOC) users with cerebral palsy (CP) that are problematic to optimal prescription and to explore comorbidities, features of CP, and conditions secondary to disability impacting on equipment provision for children and adults. The method is a cross-sectional study of EPIOC users (n = 102) with a prim…	adaptive seating; aging; cerebral palsy; comorbidity; powered wheelchairs	Artificial intelligence; Diseases; adaptive seating; ageing; Cerebral palsy; Co morbidities; Powered wheel chairs; Wheelchairs; adolescent; adult; aged; aging; cerebral palsy; child; comorbidity; complication; cross-sectional study; equipment design; female; human; male; middle aged; pathophysiology; retrospective study; wheelchair; young adult; Adolescent; Adult; Aged; Aging; Cerebral Palsy; Chi…	Article	Scopus
Malcolm M.P., Roll M.C.	The impact of assistive technology services in post-secondary education for students with disabilities: Intervention outcomes, use-profiles, and user-experiences	2017	Assistive Technology	2	https://www.scopus.com/inward/record.uri?eid=2-s2.0-84989234527&doi=10.1080%2f10400435.2016.1214932&partnerID=40&md5=e9c7118aea08cd88a8cb2945cf1fbc5a	Department of Occupational Therapy, Colorado State University, Fort Collins, CO, United States; Assistive Technology Resource Center, Colorado State University, Fort Collins, CO, United States	Malcolm, M.P., Department of Occupational Therapy, Colorado State University, Fort Collins, CO, United States, Assistive Technology Resource Center, Colorado State University, Fort Collins, CO, United States; Roll, M.C., Department of Occupational Therapy, Colorado State University, Fort Collins, CO, United States, Assistive Technology Resource Center, Colorado State University, Fort Collins, CO,…	The outcomes of assistive technology (AT) support services for post-secondary education students with disabilities are under-reported, and little is known about use-profiles and user experiences when AT interventions are applied to this rapidly growing population. We examined AT service outcomes related to performance and satisfaction of common academic tasks (using the Canadian Occupational Perf…	assistive technology; disability; occupational therapy; post-secondary education	Education; Engineering education; Occupational therapy; Surveys; Assistive technology; College students; disability; Performance measure; Post graduation; Postsecondary education; Support services; User experience; Students; disabled person; human; occupational therapy; procedures; psychology; rehabilitation; retrospective study; satisfaction; self help device; statistics and numerical data; stud…	Article	Scopus
Ghédira M., Albertsen I.M., Mardale V., Gracies J., Bayle N., Hutin É.	Wireless, accelerometry-triggered functional electrical stimulation of the peroneal nerve in spastic paresis: A randomized, controlled pilot study	2017	Assistive Technology	3	https://www.scopus.com/inward/record.uri?eid=2-s2.0-84988373927&doi=10.1080%2f10400435.2016.1214933&partnerID=40&md5=914e9107d5a3992d226c18bff6eb63f2	Laboratoire Analyse et Restauration du Mouvement, BIOTN-EA 7377, IMRB, Université Paris-Est, Fédération de Rééducation Neurolocomotrice, Hôpitaux Universitaires Henri Mondor, Assistance Publique–Hôpitaux de Paris, Créteil, France	Ghédira, M., Laboratoire Analyse et Restauration du Mouvement, BIOTN-EA 7377, IMRB, Université Paris-Est, Fédération de Rééducation Neurolocomotrice, Hôpitaux Universitaires Henri Mondor, Assistance Publique–Hôpitaux de Paris, Créteil, France; Albertsen, I.M., Laboratoire Analyse et Restauration du Mouvement, BIOTN-EA 7377, IMRB, Université Paris-Est, Fédération de Rééducation Neurolocomotrice, H…	In hemiparesis, Wireless, Accelerometry-Triggered Functional Electrical Stimulation (WAFES) of the common peroneal nerve may hold intrinsic rehabilitative properties. The present pilot study analyzes WAFES against conventional therapy. Twenty adults with chronic hemiparesis (time since lesion 7(6) years; median (interquartile range)) were randomized into 2 10-week rehabilitation programs: a 45-mi…	active ankle dorsiflexion; functional electrical stimulation; gait; spastic paresis	Accelerometers; Functional electric stimulation; Kinematics; Clinical assessments; Common peroneal nerves; Dorsiflexions; Functional electri-cal stimulations; gait; Inter quartile ranges; Rehabilitation programs; spastic paresis; Physiological models; accelerometry; adult; biomechanics; controlled study; electrostimulation; exercise test; female; gait; human; male; middle aged; paresis; peroneus …	Article	Scopus
Sherrod B.A., Dew D.A., Rogers R., Rimmer J.H., Eberhardt A.W.	Design and validation of a low cost, high-capacity weighing device for wheelchair users and bariatrics	2017	Assistive Technology		https://www.scopus.com/inward/record.uri?eid=2-s2.0-84988318622&doi=10.1080%2f10400435.2016.1201170&partnerID=40&md5=dbea5a3545aec770e29dcc66b346f957	School of Medicine, University of Alabama at Birmingham, Birmingham, AL, United States; Lakeshore Foundation, Birmingham, AL, United States; School of Health Professions, University of Alabama at Birmingham, Birmingham, AL, United States; Department of Biomedical Engineering, University of Alabama at Birmingham, School of Engineering, Birmingham, AL, United States	Sherrod, B.A., School of Medicine, University of Alabama at Birmingham, Birmingham, AL, United States; Dew, D.A., Lakeshore Foundation, Birmingham, AL, United States; Rogers, R., Lakeshore Foundation, Birmingham, AL, United States; Rimmer, J.H., School of Health Professions, University of Alabama at Birmingham, Birmingham, AL, United States; Eberhardt, A.W., Department of Biomedical Engineering, …	Accessible high-capacity weighing scales are scarce in healthcare facilities, in part due to high device cost and weight. This shortage impairs weight monitoring and health maintenance for people with disabilities and/or morbid obesity. We conducted this study to design and validate a lighter, lower cost, high-capacity accessible weighing device. A prototype featuring 360 kg (800 lbs) of weight c…	disability; obesity; scale; weight; wheelchair	Costs; Nutrition; Surveys; Weighing; Wheelchairs; disability; Health maintenances; obesity; People with disabilities; scale; weight; Wheelchair accessible; Wireless data transmission; Scales (weighing instruments); bariatrics; body weight; computer aided design; devices; economics; equipment design; human; morphometry; obesity; standards; wheelchair; Bariatrics; Body Weight; Body Weights and Meas…	Article	Scopus
Taghvaei S., Jahanandish M.H., Kosuge K.	Autoregressive-moving-average hidden Markov model for vision-based fall prediction—An application for walker robot	2017	Assistive Technology	3	https://www.scopus.com/inward/record.uri?eid=2-s2.0-84991255663&doi=10.1080%2f10400435.2016.1174178&partnerID=40&md5=f8a550f4068a06c6182a987b960e842b	School of Mechanical Engineering, Shiraz University, Shiraz, Iran; Department of Bioengineering and Robotics, Tohoku University, Aoba, Aramaki, Japan	Taghvaei, S., School of Mechanical Engineering, Shiraz University, Shiraz, Iran; Jahanandish, M.H., School of Mechanical Engineering, Shiraz University, Shiraz, Iran; Kosuge, K., Department of Bioengineering and Robotics, Tohoku University, Aoba, Aramaki, Japan	Population aging of the societies requires providing the elderly with safe and dependable assistive technologies in daily life activities. Improving the fall detection algorithms can play a major role in achieving this goal. This article proposes a real-time fall prediction algorithm based on the acquired visual data of a user with walking assistive system from a depth sensor. In the lack of a co…	autoregressive-moving-average (ARMA) model; hidden Markov model; human fall prediction; walking assistive robot	Artificial intelligence; Forecasting; Gaussian noise (electronic); Learning systems; Markov processes; Robots; Walking aids; Assistive robots; Assistive technology; Auto regressive moving average modeling; Autoregressive moving average; Autoregressive moving average model; Coupled dynamics; Daily life activities; Prediction algorithms; Hidden Markov models; algorithm; ambulatory monitoring; devic…	Article	Scopus
Wilhite C.S., Field W.E., Jaramillo M.	Tractor seating for operators with paraplegia	2017	Assistive Technology	1	https://www.scopus.com/inward/record.uri?eid=2-s2.0-84988384788&doi=10.1080%2f10400435.2016.1201171&partnerID=40&md5=d0fd284e8d40ca27ef6e42931d456e9f	Division of Occupational Therapy, University of New Mexico, Albuquerque, NM, United States; Agricultural and Biological Systems, Purdue University, West Lafayette, IN, United States	Wilhite, C.S., Division of Occupational Therapy, University of New Mexico, Albuquerque, NM, United States; Field, W.E., Agricultural and Biological Systems, Purdue University, West Lafayette, IN, United States; Jaramillo, M., Division of Occupational Therapy, University of New Mexico, Albuquerque, NM, United States	This feasibility study explored the utility of using a pressure mapping instrument to explore the variable of pressure under subjects sitting on a commonly used tractor seat, and four other cushion interventions. The research model used single-subject with repeated measures during simulated tractor operation. In examining the graphical images and pressure mapping data available from the instrumen…	intervention; paraplegia; pressure mapping; seating supports; tractor seating	Mapping; Pressure distribution; Tractors (truck); Agricultural equipment; Dynamic environments; Feasibility studies; intervention; paraplegia; Pressure mapping; Repeated measures; Wheelchair cushions; Tractors (agricultural); adult; agriculture; body position; decubitus; equipment design; feasibility study; female; human; image processing; male; middle aged; paraplegia; physiology; pressure; whee…	Article	Scopus
Horton E.L., Renganathan R., Toth B.N., Cohen A.J., Bajcsy A.V., Bateman A., Jennings M.C., Khattar A., Kuo R.S., Lee F.A., Lim M.K., Migasiuk L.W., Zhang A., Zhao O.K., Oliveira M.A.	A review of principles in design and usability testing of tactile technology for individuals with visual impairments	2017	Assistive Technology	3	https://www.scopus.com/inward/record.uri?eid=2-s2.0-84988328554&doi=10.1080%2f10400435.2016.1176083&partnerID=40&md5=94eaf551bdfcf63b1ce0aa75590eaf66	Division of Information Technology, University of Maryland, College Park, MD, United States	Horton, E.L., Division of Information Technology, University of Maryland, College Park, MD, United States; Renganathan, R., Division of Information Technology, University of Maryland, College Park, MD, United States; Toth, B.N., Division of Information Technology, University of Maryland, College Park, MD, United States; Cohen, A.J., Division of Information Technology, University of Maryland, Coll…	To lay the groundwork for devising, improving, and implementing new technologies to meet the needs of individuals with visual impairments, a systematic literature review was conducted to: a) describe hardware platforms used in assistive devices, b) identify their various applications, and c) summarize practices in user testing conducted with these devices. A search in relevant EBSCO databases for…	computer access; education; electronic aids to daily living; emerging trends; usability; visual impairment	Computer hardware; Hardware; Ophthalmology; Reconfigurable hardware; Touch screens; Computer access; Electronic aids to daily livings; Emerging trends; usability; Visual impairment; Usability engineering; equipment design; human; rehabilitation; self help device; software; visually impaired person; Equipment Design; Humans; Self-Help Devices; Software; Visually Impaired Persons	Article	Scopus
Blow N., Biswas P.	A pointing facilitation system for motor-impaired users combining polynomial smoothing and time-weighted gradient target prediction models	2017	Assistive Technology		https://www.scopus.com/inward/record.uri?eid=2-s2.0-84988312173&doi=10.1080%2f10400435.2016.1178670&partnerID=40&md5=662f8aff70bd531c3b63f44061312d61	Computer Laboratory, University of Cambridge, Cambridge, United Kingdom; Indian Institute of Science, Bangalore, India; Department of Engineering, University of Cambridge, Cambridge, United Kingdom	Blow, N., Computer Laboratory, University of Cambridge, Cambridge, United Kingdom; Biswas, P., Indian Institute of Science, Bangalore, India, Department of Engineering, University of Cambridge, Cambridge, United Kingdom	As computers become more and more essential for everyday life, people who cannot use them are missing out on an important tool. The predominant method of interaction with a screen is a mouse, and difficulty in using a mouse can be a huge obstacle for people who would otherwise gain great value from using a computer. If mouse pointing were to be made easier, then a large number of users may be abl…	hand strength evaluation; motor-impairment; pointing facilitation; polynomial smoothing; target prediction	HTTP; Mammals; Polynomials; User interfaces; Motor impaired users; Motor impairments; Prediction model; Smoothing algorithms; Strength evaluation; Target prediction; Target selection; Web-based prototype; Forecasting; adult; algorithm; arm; computer; female; hand; hand strength; human; male; middle aged; motor dysfunction; physiology; self help device; statistical model; task performance; time fa…	Article	Scopus
Papadopoulos K., Koustriava E., Koukourikos P., Kartasidou L., Barouti M., Varveris A., Misiou M., Zacharogeorga T., Anastasiadis T.	Comparison of three orientation and mobility aids for individuals with blindness: Verbal description, audio-tactile map and audio-haptic map	2017	Assistive Technology	7	https://www.scopus.com/inward/record.uri?eid=2-s2.0-84983534929&doi=10.1080%2f10400435.2016.1171809&partnerID=40&md5=43e2bdd56491c344844c9a6e10883ddf	Department of Educational and Social Policy, University of Macedonia, Thessaloniki, Greece; Faculty of Education, National and Kapodistrian University of Athens, Athens, Greece; KAIKOS Project, University of Macedonia, Thessaloniki, Greece	Papadopoulos, K., Department of Educational and Social Policy, University of Macedonia, Thessaloniki, Greece; Koustriava, E., Department of Educational and Social Policy, University of Macedonia, Thessaloniki, Greece; Koukourikos, P., KAIKOS Project, University of Macedonia, Thessaloniki, Greece; Kartasidou, L., Department of Educational and Social Policy, University of Macedonia, Thessaloniki, G…	Disorientation and inability of wayfinding are phenomena with a great frequency for individuals with visual impairments during the process of travelling novel environments. Orientation and mobility aids could suggest important tools for the preparation of a more secure and cognitively mapped travelling. The aim of the present study was to examine if spatial knowledge structured after an individua…	audio-haptic map; audio-tactile map; blindness; spatial knowledge	Maps; Audio-haptic; Audio-tactile maps; blindness; Mobility aids; Points of interest; Spatial knowledge; Visual impairment; Way-finding; Eye protection; adolescent; adult; female; human; male; map; middle aged; physiology; rehabilitation; self help device; software; spatial orientation; touch; verbal behavior; visually impaired person; young adult; Adolescent; Adult; Female; Humans; Male; Maps as…	Article	Scopus
Chu M.-T., Khosla R., Khaksar S.M.S., Nguyen K.	Service innovation through social robot engagement to improve dementia care quality	2017	Assistive Technology	24	https://www.scopus.com/inward/record.uri?eid=2-s2.0-84983473865&doi=10.1080%2f10400435.2016.1171807&partnerID=40&md5=5bacee8dbba94a1cd8e20dbb1b93fb44	Department of Management and Marketing, La Trobe Business School, La Trobe University, Melbourne, VIC, Australia; Research Centre for Computers, Communication and Social Innovation (RECCSI), La Trobe University, Melbourne, VIC, Australia	Chu, M.-T., Department of Management and Marketing, La Trobe Business School, La Trobe University, Melbourne, VIC, Australia; Khosla, R., Department of Management and Marketing, La Trobe Business School, La Trobe University, Melbourne, VIC, Australia; Khaksar, S.M.S., Department of Management and Marketing, La Trobe Business School, La Trobe University, Melbourne, VIC, Australia; Nguyen, K., Rese…	Assistive technologies, such as robots, have proven to be useful in a social context and to improve the quality of life for people with dementia (PwD). This study aims to show how the engagement between two social robots and PwD in Australian residential care facilities can improve care quality. An observational method is adopted in the research methodology to discover behavioural patterns during…	dementia care; older people; service delivery; service innovation; social engagement; social robot	Face recognition; Neurodegenerative diseases; Dementia cares; Older People; Service delivery; Service innovation; Social engagement; Social robots; Robots; aged; analysis of variance; dementia; devices; female; health care delivery; health care quality; human; male; procedures; quality of life; robotics; social behavior; very elderly; Aged; Aged, 80 and over; Analysis of Variance; Delivery of Hea…	Article	Scopus
Mhatre A., Duvall J., Ding D., Cooper R., Pearlman J.	Design and focus group evaluation of a bed-integrated weight measurement system for wheelchair users	2016	Assistive Technology	2	https://www.scopus.com/inward/record.uri?eid=2-s2.0-84984919708&doi=10.1080%2f10400435.2016.1140690&partnerID=40&md5=188c4e24217e7c91b48f572ef3e5a6ec	Human Engineering Research Laboratories, Department of Veterans Affairs, Pittsburgh, PA, United States; Department of Rehabilitation Science and Technology, University of Pittsburgh, Pittsburgh, PA, United States	Mhatre, A., Human Engineering Research Laboratories, Department of Veterans Affairs, Pittsburgh, PA, United States, Department of Rehabilitation Science and Technology, University of Pittsburgh, Pittsburgh, PA, United States; Duvall, J., Human Engineering Research Laboratories, Department of Veterans Affairs, Pittsburgh, PA, United States, Department of Rehabilitation Science and Technology, Univ…	Regular weight monitoring is known to help with weight management, which is an important part of maintaining a healthy, active lifestyle. Unfortunately, weight monitoring is challenging for wheelchair users because the few scales that are available are expensive and very large. Consequently, wheelchair users typically learn their weight at infrequent visits to their healthcare providers, which li…	accessible design; Embedded Scale; obesity; self-weighing; weight monitoring; weight scale	Design; Health risks; Nutrition; Weighing; Wheelchairs; Design and Development; Development and testing; Development approach; Embedded Scale; Health care providers; Institutional review boards; obesity; Weight-scale; Scales (weighing instruments)	Article	Scopus
Duvall J., Sinagra E., Cooper R., Pearlman J.	Proposed pedestrian pathway roughness thresholds to ensure safety and comfort for wheelchair users	2016	Assistive Technology	4	https://www.scopus.com/inward/record.uri?eid=2-s2.0-84984907986&doi=10.1080%2f10400435.2016.1150364&partnerID=40&md5=c2713bb77915d0915178e903440dd83a	Human Engineering Research Laboratories, Department of Veterans Affairs, Pittsburgh Healthcare System, Pittsburgh, PA, United States; Department of Rehabilitation Sciences and Technology, School of Health and Rehabilitation Sciences, University of Pittsburgh, Pittsburgh, PA, United States	Duvall, J., Human Engineering Research Laboratories, Department of Veterans Affairs, Pittsburgh Healthcare System, Pittsburgh, PA, United States, Department of Rehabilitation Sciences and Technology, School of Health and Rehabilitation Sciences, University of Pittsburgh, Pittsburgh, PA, United States; Sinagra, E., Human Engineering Research Laboratories, Department of Veterans Affairs, Pittsburgh…	In the United States, over three million people use a wheelchair for their primary means of mobility and they rely on functional and accessible pathways to participate in their communities. The Americans with Disabilities Act Accessibility Guidelines related to pathway roughness are currently ambiguous, subjective and therefore unable to be measured. Consequently, many public pathways are suffici…	roughness; sidewalk; vibrations; wheelchair	Health risks; Pedestrian safety; Surface roughness; Wheelchairs; Accessibility guidelines; Americans with disabilities acts; Roughness of surface; sidewalk; Subjective rating; Surface segments; Vibration exposure; vibrations; Vibrations (mechanical)	Article	Scopus
Nickel E., Hansen A., Pearlman J., Goldish G.	A drive system to add standing mobility to a manual standing wheelchair	2016	Assistive Technology	4	https://www.scopus.com/inward/record.uri?eid=2-s2.0-84984891060&doi=10.1080%2f10400435.2016.1165757&partnerID=40&md5=fb647954b09b6dc4edf33e621b289412	Minneapolis VA Health Care System, Minneapolis, MN, United States; Program in Rehabilitation Science, University of Minnesota, Minneapolis, MN, United States; Department of Rehab Science & Technology, University of Pittsburgh, Pittsburgh, PA, United States; Human Engineering Research Labs, VA Pittsburgh Healthcare Systems, Pittsburgh, PA, United States; Extended Care and Rehabilitation, Minneapol…	Nickel, E., Minneapolis VA Health Care System, Minneapolis, MN, United States; Hansen, A., Minneapolis VA Health Care System, Minneapolis, MN, United States, Program in Rehabilitation Science, University of Minnesota, Minneapolis, MN, United States; Pearlman, J., Department of Rehab Science & Technology, University of Pittsburgh, Pittsburgh, PA, United States, Human Engineering Research Labs, VA …	Current manual standing wheelchairs are not mobile in the standing position. The addition of standing mobility may lead to improved health and function for the user and may increase utilization of standing wheelchairs. In this project, a chain drive system was fitted to a manual standing wheelchair, adding mobility in the standing position. The hand rims are accessible from both seated and standi…	accessibility; chain drive; manual; mid-wheel drive; mobile; spinal cord injury; stability; standing; wheelchair	Chains; Convergence of numerical methods; Feedback; Mechanical drives; Patient rehabilitation; Wheels; accessibility; manual; mobile; Spinal cord injuries (SCI); standing; Wheel drives; Wheelchairs	Article	Scopus
Zhang W., Ma W., Brandao M., Kaber D.B., Bloomfield P., Swangnetr M.	Biometric validation of a virtual reality-based psychomotor test for motor skill training	2016	Assistive Technology	1	https://www.scopus.com/inward/record.uri?eid=2-s2.0-84984714241&doi=10.1080%2f10400435.2016.1165758&partnerID=40&md5=474e64e783c3bda6686ed77164431d06	Edward P. Fitts Department of Industrial and Systems Engineering, North Carolina State University, Raleigh, NC, United States; Strategic Research, Advanced Product Development & Sales, Johnson Controls, IncMI, United States; Department of Statistics, North Carolina State University, Raleigh, NC, United States; Research Center in Back, Neck, Other Joint Pain and Human Performance, Khon Kaen Univer…	Zhang, W., Edward P. Fitts Department of Industrial and Systems Engineering, North Carolina State University, Raleigh, NC, United States; Ma, W., Strategic Research, Advanced Product Development & Sales, Johnson Controls, IncMI, United States; Brandao, M., Edward P. Fitts Department of Industrial and Systems Engineering, North Carolina State University, Raleigh, NC, United States; Kaber, D.B., Ed…	Psychomotor tests have been applied in clinical therapy and laboratory research as tools for evaluating motor and cognitive skills. Some studies have developed computerized versions of such tests using virtual reality (VR) systems with haptic interface controls. These systems allow for increased flexibility in test delivery and accuracy in performance assessment. In this study, a VR-based compute…	cognitive workload; electromyography; motor skill training; psychomotor task performance; virtual reality	Haptic interfaces; Virtual reality; Cognitive workloads; Increased flexibility; Interface control; Motor skills; Muscle activation; Performance assessment; Subjective rating; Task performance; Electromyography; adult; clinical trial; computer simulation; controlled study; electromyography; human; motor performance; muscle contraction; psychomotor performance; validation process; virtual reality; …	Article	Scopus
Rogers E., Leineweber M.J., Andrysek J.	Analysis of terrain effects on the interfacial force distribution at the hand and forearm during crutch gait	2016	Assistive Technology	2	https://www.scopus.com/inward/record.uri?eid=2-s2.0-84984678007&doi=10.1080%2f10400435.2016.1140691&partnerID=40&md5=de121eaf6dafa66509b84c06d6002ed6	Institute of Biomaterials and Biomedical Engineering, University of Toronto, Toronto, ON, Canada; Bloorview Research Institute, Holland Bloorview Kids Rehabilitation Hospital, Toronto, ON, Canada; Institute of Biomaterials and Biomedical Engineering, University of Toronto, Toronto, ON, Canada	Rogers, E., Institute of Biomaterials and Biomedical Engineering, University of Toronto, Toronto, ON, Canada; Leineweber, M.J., Bloorview Research Institute, Holland Bloorview Kids Rehabilitation Hospital, Toronto, ON, Canada; Andrysek, J., Bloorview Research Institute, Holland Bloorview Kids Rehabilitation Hospital, Toronto, ON, Canada, Institute of Biomaterials and Biomedical Engineering, Unive…	Forces transferred to the upper body during crutch use can lead to both short-term and long-term injuries, including joint pain, crutch palsy, and over-use injuries. While this force transmission has been studied in controlled laboratory settings, it is unclear how these forces are affected by irregular terrains commonly encountered during community ambulation. The purpose of this study was to de…	carpal tunnel; crutch; force transmission; gait; terrain	Human rehabilitation equipment; Walking aids; Carpal tunnel; Compressive forces; Contact surface; Controlled laboratories; Force transmission; gait; terrain; Interfacial forces; Irregular terrain; Landforms	Article	Scopus
Pool S.M., Hoyle J.M., Malone L.A., Cooper L., Bickel C.S., McGwin G., Rimmer J.H., Eberhardt A.W.	Navigation of a virtual exercise environment with Microsoft Kinect by people post-stroke or with cerebral palsy	2016	Assistive Technology	8	https://www.scopus.com/inward/record.uri?eid=2-s2.0-84984670464&doi=10.1080%2f10400435.2016.1167789&partnerID=40&md5=1a230092de288435136c6c4c0925d26f	Department of Biomedical Engineering, University of Alabama at Birmingham, Birmingham, AL, United States; UAB/Lakeshore Research Collaborative, Birmingham, AL, United States; PUSH Product Design, Birmingham, AL, United States; Department of Physical Therapy, University of Alabama at Birmingham, Birmingham, AL, United States; Department of Epidemiology, University of Alabama at Birmingham, Birming…	Pool, S.M., Department of Biomedical Engineering, University of Alabama at Birmingham, Birmingham, AL, United States; Hoyle, J.M., Department of Biomedical Engineering, University of Alabama at Birmingham, Birmingham, AL, United States; Malone, L.A., UAB/Lakeshore Research Collaborative, Birmingham, AL, United States; Cooper, L., PUSH Product Design, Birmingham, AL, United States; Bickel, C.S., D…	One approach to encourage and facilitate exercise is through interaction with virtual environments. The present study assessed the utility of Microsoft Kinect as an interface for choosing between multiple routes within a virtual environment through body gestures and voice commands. The approach was successfully tested on 12 individuals post-stroke and 15 individuals with cerebral palsy (CP). Part…	disability; exercise; Kinect; virtual environment	Diseases; Cerebral palsy; disability; exercise; Kinect; Likert scale; Microsoft kinect; Multiple routes; Voice command; Virtual reality	Article	Scopus
Paleg G., Huang M., Vasquez Gabela S.C., Sprigle S., Livingstone R.	Comparison of the inertial properties and forces required to initiate movement for three gait trainers	2016	Assistive Technology	2	https://www.scopus.com/inward/record.uri?eid=2-s2.0-84980024594&doi=10.1080%2f10400435.2015.1123780&partnerID=40&md5=b8b615e0a8dc8c82cb3136fcb5cd14bd	Montgomery County Infants and Toddlers Program, Rockville, MD, United States; Rehabilitation Engineering & Applied Research Laboratory, Georgia Institute of Technology, Atlanta, GA, United States; Sunny Hill Health Centre for Children, Vancouver, BC, Canada	Paleg, G., Montgomery County Infants and Toddlers Program, Rockville, MD, United States; Huang, M., Rehabilitation Engineering & Applied Research Laboratory, Georgia Institute of Technology, Atlanta, GA, United States; Vasquez Gabela, S.C., Rehabilitation Engineering & Applied Research Laboratory, Georgia Institute of Technology, Atlanta, GA, United States; Sprigle, S., Rehabilitation Engineering…	The purpose of this study was to evaluate the inertial properties and forces required to initiate movement on two different surfaces in a sample of three commonly prescribed gait trainers. Tests were conducted in a laboratory setting to compare the Prime Engineering KidWalk, Rifton Pacer, and Snug Seat Mustang with and without a weighted anthropometric test dummy configured to the weight and prop…	assistive devices; children with physical disabilities; mobility; neuromotor disorder; physical disability	Carrier mobility; Human rehabilitation equipment; Anthropometric test dummies; Assistive devices; Inertial properties; Mass impact; Neuromotor; Physical disability; Wheel drives; Wheels; biological model; biomechanics; devices; disabled person; equipment design; gait; human; neuromuscular disease; physiology; preschool child; self help device; Biomechanical Phenomena; Child, Preschool; Disabled P…	Article	Scopus
Koumpouros Y., Karavasili A., Papageorgiou E., Siavelis P.	Validation of the Greek version of the device subscale of the Quebec User Evaluation of Satisfaction with Assistive Technology 2.0 (QUEST 2.0)	2016	Assistive Technology	13	https://www.scopus.com/inward/record.uri?eid=2-s2.0-84980023450&doi=10.1080%2f10400435.2015.1131758&partnerID=40&md5=71f3265fbe809a17db87868e45a4806a	Department of Informatics, Technological Educational Institute of Athens, Aigaleo, Greece; Diaplasis Rehabilitation Hospital, Kalamata, Greece; Department of Medical Laboratories, Technological Educational Institute of Athens, Aigaleo, Greece	Koumpouros, Y., Department of Informatics, Technological Educational Institute of Athens, Aigaleo, Greece; Karavasili, A., Diaplasis Rehabilitation Hospital, Kalamata, Greece; Papageorgiou, E., Department of Medical Laboratories, Technological Educational Institute of Athens, Aigaleo, Greece; Siavelis, P., Diaplasis Rehabilitation Hospital, Kalamata, Greece, Department of Medical Laboratories, Te…	The purpose of the study was to evaluate the device subscale of the QUEST 2.0 instrument and provide evidence for the validity and reliability of the Greek version. To this end, a cross-cultural adaptation was performed. Field test studies were conducted to validate the appropriateness of the final outcome. Data were drawn from a study of 115 subjects who had been administered the GR-QUEST questi…	assessment; assistive technology; Greece; QUEST 2.0; user satisfaction; validation	Durability; Factor analysis; Surveys; assessment; Assistive technology; Greece; QUEST 2.0; User satisfaction; validation; Human computer interaction; assistive technology; comfort; exploratory research; factorial analysis; Greece; Greek (citizen); human; instrument validation; major clinical study; Quebec; questionnaire; reliability; safety; satisfaction; validation process; validity; varimax rot…	Article	Scopus
Sabari J., Shea M., Chen L., Laurenceau A., Leung E.	Impact of wheelchair seat height on neck and shoulder range of motion during functional task performance	2016	Assistive Technology	5	https://www.scopus.com/inward/record.uri?eid=2-s2.0-84980012042&doi=10.1080%2f10400435.2016.1140692&partnerID=40&md5=533be7ba864715597036b4749fb34005	Occupational Therapy Program, SUNY Downstate College of Health Related Professions Occupational Therapy, Brooklyn, NY, United States; Kessler Institute for Rehabilitation, West Orange, NJ, United States	Sabari, J., Occupational Therapy Program, SUNY Downstate College of Health Related Professions Occupational Therapy, Brooklyn, NY, United States; Shea, M., Kessler Institute for Rehabilitation, West Orange, NJ, United States; Chen, L., Occupational Therapy Program, SUNY Downstate College of Health Related Professions Occupational Therapy, Brooklyn, NY, United States; Laurenceau, A., Occupational …	Wheelchair users are at high risk for developing repetitive stress injuries (RSI) of the cervical spine and glenohumeral joints due to increased demands on active range of motion (AROM) when performing functional tasks from a seated position. The addition of a seat elevation device may alleviate the risk factors that lead to the development of RSI. However, there are no studies which establish th…	activities of daily living; mobility; positioning and support surfaces; seating; wheeled mobility aids	Carrier mobility; Health insurance; Activities of Daily Living; Gleno-humeral joints; Repetitive stress injuries; seating; Shoulder abductions; Statistically significant difference; Support surfaces; Wheeled mobility; Wheelchairs; adult; body position; daily life activity; female; human; joint characteristics and functions; male; middle aged; neck; physiology; shoulder; task performance; wheelcha…	Article	Scopus
Nemunaitis G., Roach M.J., Hefzy M.S., Mejia M.	Redesign of a spine board: Proof of concept evaluation	2016	Assistive Technology	5	https://www.scopus.com/inward/record.uri?eid=2-s2.0-84980007108&doi=10.1080%2f10400435.2015.1131759&partnerID=40&md5=6ac4ab488f558a10b6dd5c0b90c2a068	Department of PM&R, MetroHealth Rehabilitation Institute of Ohio, Cleveland, OH, United States; Department of PM&R, MetroHealth Medical Center, Cleveland, OH, United States; Department of PM&R, School of Medicine, Case Western Reserve University, Cleveland, OH, United States; Department of Research, Center for Health Research and Policy at MetroHealth Medical Center, Cleveland, OH, United States;…	Nemunaitis, G., Department of PM&R, MetroHealth Rehabilitation Institute of Ohio, Cleveland, OH, United States, Department of PM&R, MetroHealth Medical Center, Cleveland, OH, United States, Department of PM&R, School of Medicine, Case Western Reserve University, Cleveland, OH, United States; Roach, M.J., Department of PM&R, School of Medicine, Case Western Reserve University, Cleveland, OH, Unite…	Sacral pressure ulcers are a significant problem in individuals following spinal cord injury (SCI) and are felt to be in part due to the high interface-pressures applied to the body while lying on a standard spine board (SSB) during emergency transport. The aim of the present study was to assess the interface pressures and sensing areas between the body and the SSB and two proof of concept spine …	assessment; neuromuscular impairment; support surfaces	assessment; Emergency transports; Interface pressure; Neuromuscular impairments; Pair-wise comparison; Proof of concept; Spinal cord injuries (SCI); Support surfaces; Human rehabilitation equipment; adult; comparative study; decubitus; devices; equipment design; female; human; immobilization; male; middle aged; patient positioning; pressure; proof of concept; prospective study; randomization; spi…	Article	Scopus
Altalmas T., Aula A., Ahmad S., Tokhi M.O., Akmeliawati R.	Integrated modeling and design for realizing a two-wheeled wheelchair for disabled	2016	Assistive Technology	3	https://www.scopus.com/inward/record.uri?eid=2-s2.0-84979997602&doi=10.1080%2f10400435.2016.1140688&partnerID=40&md5=4bf3b0f115c09570f069aaba912c1140	Department of Mechatronics, Kulliyyah of Engineering, International Islamic University Malaysia, Jalan Gombak, Kuala Lumpur, Malaysia; Department of Automatic Control and Systems Engineering, The University of Sheffield, Sheffield, United Kingdom	Altalmas, T., Department of Mechatronics, Kulliyyah of Engineering, International Islamic University Malaysia, Jalan Gombak, Kuala Lumpur, Malaysia; Aula, A., Department of Mechatronics, Kulliyyah of Engineering, International Islamic University Malaysia, Jalan Gombak, Kuala Lumpur, Malaysia; Ahmad, S., Department of Mechatronics, Kulliyyah of Engineering, International Islamic University Malaysi…	Two-wheeled wheelchairs are considered highly nonlinear and complex systems. The systems mimic a double-inverted pendulum scenario and will provide better maneuverability in confined spaces and also to reach higher level of height for pick and place tasks. The challenge resides in modeling and control of the two-wheeled wheelchair to perform comparably to a normal four-wheeled wheelchair. Most co…	double inverted pendulum; equality; Lagrangian model; mobility; two-wheeled mobile robot; wheelchair	Carrier mobility; Hardware; Lagrange multipliers; Mobile robots; Pendulums; Reconfigurable hardware; State space methods; Double inverted pendulum; equality; Hardware implementations; Integrated modeling; Lagrangian models; Modeling and control; State - space models; Two wheeled mobile robot; Wheelchairs; computer simulation; disabled person; equipment design; human; procedures; rehabilitation; t…	Article	Scopus
Cheng P.-H.	Wearable ultrasonic guiding device with white cane for the visually impaired: A preliminary verisimilitude experiment	2016	Assistive Technology	6	https://www.scopus.com/inward/record.uri?eid=2-s2.0-84979996221&doi=10.1080%2f10400435.2015.1123781&partnerID=40&md5=b9c4a84a49870e0adf77e45dea02238e	Department of Software Engineering and Management, National Kaohsiung Normal University, Kaohsiung, Taiwan	Cheng, P.-H., Department of Software Engineering and Management, National Kaohsiung Normal University, Kaohsiung, Taiwan	Several assistive technologies are available to help visually impaired individuals avoid obstructions while walking. Unfortunately, white canes and medical walkers are unable to detect obstacles on the road or react to encumbrances located above the waist. In this study, I adopted the cyber-physical system approach in the development of a cap-connected device to compensate for gaps in detection a…	cyber-physical system; heuristic evaluation; ubiquitous computing; ultrasonic sensor; usability analysis; visually impaired; wearable device	Embedded systems; Ubiquitous computing; Ultrasonic applications; Ultrasonic sensors; Walking aids; Cyber physical systems (CPSs); Heuristic evaluation; Usability analysis; Visually impaired; Wearable devices; Wearable technology; adult; cane; devices; equipment design; female; human; male; rehabilitation; self help device; sensory aid; spatial orientation; ultrasound; visually impaired person; yo…	Article	Scopus
Sivan M., Gallagher J., Holt R., Weightman A., O’Connor R., Levesley M.	Employing the International Classification of Functioning, Disability and Health framework to capture user feedback in the design and testing stage of development of home-based arm rehabilitation technology	2016	Assistive Technology	2	https://www.scopus.com/inward/record.uri?eid=2-s2.0-84979976509&doi=10.1080%2f10400435.2016.1140689&partnerID=40&md5=8461662355383acd3c2967590a2fbc2e	Academic Department of Rehabilitation Medicine, University of Leeds, Leeds, United Kingdom; Institute of Brain, Behaviour and Mental Health, University of Manchester, Manchester, United Kingdom; School of Mechanical Engineering, University of Leeds, Leeds, United Kingdom; School of Mechanical, Aerospace and Civil Engineering, University of Manchester, Manchester, United Kingdom	Sivan, M., Academic Department of Rehabilitation Medicine, University of Leeds, Leeds, United Kingdom, Institute of Brain, Behaviour and Mental Health, University of Manchester, Manchester, United Kingdom; Gallagher, J., School of Mechanical Engineering, University of Leeds, Leeds, United Kingdom; Holt, R., School of Mechanical Engineering, University of Leeds, Leeds, United Kingdom; Weightman, A…	The purpose of this study was to evaluate the International Classification of Functioning, Disability and Health (ICF) as a framework to ensure that key aspects of user feedback are identified in the design and testing stages of development of a home-based upper limb rehabilitation system. Seventeen stroke survivors with residual upper limb weakness, and seven healthcare professionals with expert…	robot; stroke; user involvement; user-centered design	Data visualization; Design; Machine design; Neuromuscular rehabilitation; Robots; Health care professionals; Rehabilitation devices; Semi structured interviews; stroke; Stroke rehabilitation; Upper-limb rehabilitation; User involvement; User-centered design process; User centered design; arm; devices; equipment design; human; International Classification of Functioning, Disability and Health; int…	Article	Scopus
Garcia L.F., de Oliveira L.C., de Matos D.M.	Evaluating pictogram prediction in a location-aware augmentative and alternative communication system	2016	Assistive Technology	1	https://www.scopus.com/inward/record.uri?eid=2-s2.0-84974727870&doi=10.1080%2f10400435.2015.1092181&partnerID=40&md5=cd87a5abe0fdddeff2bf666a3fe84eb9	Instituto Politécnico de Beja, Campus do Instituto Politécnico de Beja, Beja, Portugal; INESC ID Lisboa, Instituto Superior Técnico, Universidade de Lisboa, Lisboa, Portugal	Garcia, L.F., Instituto Politécnico de Beja, Campus do Instituto Politécnico de Beja, Beja, Portugal; de Oliveira, L.C., INESC ID Lisboa, Instituto Superior Técnico, Universidade de Lisboa, Lisboa, Portugal; de Matos, D.M., INESC ID Lisboa, Instituto Superior Técnico, Universidade de Lisboa, Lisboa, Portugal	This study compared the performance of two statistical location-aware pictogram prediction mechanisms, with an all-purpose (All) pictogram prediction mechanism, having no location knowledge. The All approach had a unique language model under all locations. One of the location-aware alternatives, the location-specific (Spec) approach, made use of specific language models for pictogram prediction i…	adaptive interfaces; communication rate; dynamic screen interfaces; location-awareness; pictogram prediction	Computational linguistics; Forecasting; Human rehabilitation engineering; User interfaces; Adaptive interface; Augmentative-and-alternative communication; Communication rate; Location awareness; Mixed approach; Prediction mechanisms; Specific languages; Statistically significant difference; Location; awareness; controlled study; human; human experiment; linguistics; model; prediction; adolescent;…	Article	Scopus
Fu J., Jones M., Liu T., Hao W., Yan Y., Qian G., Jan Y.-K.	A novel mobile-cloud system for capturing and analyzing wheelchair maneuvering data: A pilot study	2016	Assistive Technology	6	https://www.scopus.com/inward/record.uri?eid=2-s2.0-84974721818&doi=10.1080%2f10400435.2015.1095810&partnerID=40&md5=81c54f219bef9286b8b30617e35b7381	Department of Computer Science, University of Central Oklahoma, Edmond, OK, United States; Department of Rehabilitation Sciences, University of Oklahoma Health Sciences Center, Oklahoma City, OK, United States; Department of Computer Science, Northern Kentucky University, Highland Heights, KY, United States; School of Finance, Guangdong University of Foreign Studies, Guangzhou, China; Department …	Fu, J., Department of Computer Science, University of Central Oklahoma, Edmond, OK, United States; Jones, M., Department of Rehabilitation Sciences, University of Oklahoma Health Sciences Center, Oklahoma City, OK, United States; Liu, T., Department of Computer Science, University of Central Oklahoma, Edmond, OK, United States; Hao, W., Department of Computer Science, Northern Kentucky University…	The purpose of this pilot study was to provide a new approach for capturing and analyzing wheelchair maneuvering data, which are critical for evaluating wheelchair users’ activity levels. We proposed a mobile-cloud (MC) system, which incorporated the emerging mobile and cloud computing technologies. The MC system employed smartphone sensors to collect wheelchair maneuvering data and transmit them…	activity level; Android; cloud computing; Google App Engine; mobile computing; wheelchair maneuver	Artificial intelligence; Cloud computing; Data acquisition; Digital storage; Distributed computer systems; Learning algorithms; Learning systems; Mobile computing; Nearest neighbor search; Platform as a Service (PaaS); Signal encoding; Smartphones; Wheelchairs; Accurate analysis; Activity levels; Android; Cloud computing technologies; Data collection process; Google app engines; K nearest neighbo…	Article	Scopus
Borgestig M., Sandqvist J., Parsons R., Falkmer T., Hemmingsson H.	Eye gaze performance for children with severe physical impairments using gaze-based assistive technology—A longitudinal study	2016	Assistive Technology	24	https://www.scopus.com/inward/record.uri?eid=2-s2.0-84974711254&doi=10.1080%2f10400435.2015.1092182&partnerID=40&md5=f51abc200ba30b761fa8a50d212f9d09	Department of Social and Welfare Studies, Linköping University, Linköping, Sweden; Folke Bernadotte Regional Habilitation Centre and Department of Women’s and Children’s Health, Uppsala UniversityUppsala, Sweden; School of Occupational Therapy & Social Work, Curtin University, Perth, Australia; School of Occupational Therapy, La Trobe University, Melbourne, Australia; Rehabilitation Medicine, Dep…	Borgestig, M., Department of Social and Welfare Studies, Linköping University, Linköping, Sweden, Folke Bernadotte Regional Habilitation Centre and Department of Women’s and Children’s Health, Uppsala UniversityUppsala, Sweden; Sandqvist, J., Department of Social and Welfare Studies, Linköping University, Linköping, Sweden; Parsons, R., School of Occupational Therapy & Social Work, Curtin Univers…	Gaze-based assistive technology (gaze-based AT) has the potential to provide children affected by severe physical impairments with opportunities for communication and activities. This study aimed to examine changes in eye gaze performance over time (time on task and accuracy) in children with severe physical impairments, without speaking ability, using gaze-based AT. A longitudinal study with a b…	assistive devices; computer access; physical disability	Software testing; Assistive devices; Assistive technology; Computer access; Daily activity; Longitudinal study; Physical disability; Physical impairments; Time on tasks; Education; adolescent; cerebral palsy; child; communication aid; disabled person; eye fixation; female; human; infant; longitudinal study; male; physiology; preschool child; self help device; Adolescent; Cerebral Palsy; Child; Ch…	Article	Scopus
Searchfield G.D., Kobayashi K., Hodgson S.-A., Hodgson C., Tevoitdale H., Irving S.	Spatial masking: Development and testing of a new tinnitus assistive technology	2016	Assistive Technology	4	https://www.scopus.com/inward/record.uri?eid=2-s2.0-84974683567&doi=10.1080%2f10400435.2015.1110214&partnerID=40&md5=6a280f06b41296688d801a5187c168cc	Audiology Section, The University of Auckland, Auckland, New Zealand	Searchfield, G.D., Audiology Section, The University of Auckland, Auckland, New Zealand; Kobayashi, K., Audiology Section, The University of Auckland, Auckland, New Zealand; Hodgson, S.-A., Audiology Section, The University of Auckland, Auckland, New Zealand; Hodgson, C., Audiology Section, The University of Auckland, Auckland, New Zealand; Tevoitdale, H., Audiology Section, The University of Auc…	Masking is widely used in the management of tinnitus, however, masking at the perceived spatial location of tinnitus has not been investigated. This article examines the development of a method for the spatial masking of tinnitus. This report consists of three studies: Study I is a proof of concept study comparing customized spatial masking to conventional bilateral masking; Study II is a prototy…	localization; masking; tinnitus	Hearing aids; Speech intelligibility; Assistive technology; Development and testing; localization; Proof of concept; Quantitative result; Spatial location; Threedimensional (3-d); tinnitus; Audition; adult; aged; feasibility study; female; hearing aid; human; male; middle aged; pilot study; questionnaire; tinnitus; young adult; Adult; Aged; Feasibility Studies; Female; Hearing Aids; Humans; Male;…	Article	Scopus
Roos C., Wengelin Å.	The text telephone as an empowering technology in the daily lives of deaf people—A qualitative study	2016	Assistive Technology		https://www.scopus.com/inward/record.uri?eid=2-s2.0-84974674508&doi=10.1080%2f10400435.2015.1085923&partnerID=40&md5=4609060212634c23a9778c93cd15afd2	Department of Educational Studies, Karlstad University, Karlstad, Sweden; Department of Swedish, University of Gothenburg, Gothenburg, Sweden	Roos, C., Department of Educational Studies, Karlstad University, Karlstad, Sweden; Wengelin, Å., Department of Swedish, University of Gothenburg, Gothenburg, Sweden	Text-telephone technology (TTY) has been used for communication between deaf people since 1964. There is a gap in the scientific knowledge about the influence this may have had especially in relation to effective participation in society as well as the feeling of capability, confidence and collective meaningfulness. The aim of the present paper is, first, to disentangle the different aspects of T…	deaf; empowerment theory; on-line communication; TTY	Audition; Computational linguistics; Digital storage; deaf; Empirical analysis; empowerment theory; Interactive platform; Modern techniques; On-line communication; Pro-active approach; Scientific knowledge; Telephone sets; adolescent; adult; behavior; communication aid; female; hearing impaired person; human; male; middle aged; qualitative research; rehabilitation; Sweden; young adult; Adolescent…	Article	Scopus
Wood J.M., Elgin J., McGwin G., Jr., Owsley C.	Characteristics of on-road driving by persons with central vision loss: Learning to drive with a bioptic telescope	2016	Assistive Technology		https://www.scopus.com/inward/record.uri?eid=2-s2.0-84974661140&doi=10.1080%2f10400435.2015.1088594&partnerID=40&md5=e198ce786c7917291939def725b637c2	School of Optometry and Vision Science, Queensland University of TechnologyQLD, Australia; Driving Assessment Clinic, Department of Ophthalmology, School of Medicine, University of Alabama at Birmingham, Birmingham, AL, United States; Department of Epidemiology, School of Public Health, University of Alabama at Birmingham, Birmingham, AL, United States; Department of Ophthalmology, School of Medi…	Wood, J.M., School of Optometry and Vision Science, Queensland University of TechnologyQLD, Australia; Elgin, J., Driving Assessment Clinic, Department of Ophthalmology, School of Medicine, University of Alabama at Birmingham, Birmingham, AL, United States; McGwin, G., Jr., Department of Epidemiology, School of Public Health, University of Alabama at Birmingham, Birmingham, AL, United States, Dep…	There is limited research on the driving performance and safety of bioptic drivers and even less regarding the driving skills that are most challenging for those learning to drive with bioptic telescopes. This research consisted of case studies of five trainee bioptic drivers whose driving skills were compared with those of a group of licensed bioptic drivers (n = 23) while they drove along city,…	bioptic telescopes; on-road driving assessment; trainees; training	Automobile drivers; Digital storage; Driveways; Optical telescopes; Pattern recognition; Roads and streets; Traffic signs; Transportation; Video recording; Driver rehabilitations; Driving performance; On-road driving; Pedestrian detection; Sign recognition; Small Sample Size; trainees; Training strategy; Personnel training; adolescent; adult; car driving; education; female; human; low vision; mal…	Article	Scopus
Damiao J., Kean D.	Upper extremity neuro-rehabilitation through the use of power mobility	2016	Assistive Technology	1	https://www.scopus.com/inward/record.uri?eid=2-s2.0-84962204111&doi=10.1080%2f10400435.2015.1059906&partnerID=40&md5=024aa916d4255efb8c7ea1bbdad976aa	Power Mobility Department, Center for Discovery, Occupational Therapy, PO Box 840 Ben Mosche Rd, Harris, NY 12742, United States; Department of Occupational Therapy, Dominican College, Orangeburg, NY, United States; Department of Occupational Therapy, Center for Discovery, Harris, NY, United States	Damiao, J., Power Mobility Department, Center for Discovery, Occupational Therapy, PO Box 840 Ben Mosche Rd, Harris, NY 12742, United States, Department of Occupational Therapy, Dominican College, Orangeburg, NY, United States; Kean, D., Department of Occupational Therapy, Center for Discovery, Harris, NY, United States	Power mobility is typically used as an accommodative form of assistive technology allowing individuals with impaired ambulation to remain mobile. While research has focused on the cognitive development and social benefits of power mobility for individuals with developmental disabilities, research is lacking on using this technology to rehabilitate physical dysfunction. Recent technology, such as …	Assistive technology; Neuro-rehabilitation; Power wheelchairs	Accidents; Neuromuscular rehabilitation; Patient rehabilitation; Assistive technology; Cognitive development; Developmental disability; Motor vehicle accidents; Neurorehabilitation; Power wheelchair; Social benefits; Upper extremity functions; Economic and social effects; adult; case report; cerebral palsy; female; human; innervation; laminectomy; pathophysiology; self help device; traffic accide…	Article	Scopus
Desideri L., Bizzarri M., Bitelli C., Roentgen U., Gelderblom G.-J., De Witte L.	Implementing a routine outcome assessment procedure to evaluate the quality of assistive technology service delivery for children with physical or multiple disabilities: Perceived effectiveness, social cost, and user satisfaction	2016	Assistive Technology	9	https://www.scopus.com/inward/record.uri?eid=2-s2.0-84962191261&doi=10.1080%2f10400435.2015.1072592&partnerID=40&md5=91132a0d4debdbc4d68fba85a9db6bba	Centre for Assistive Technology-Az. USL Bologna-Ausilioteca, AIAS Bologna Onlus, Via Sant'Isaia 90, Bologna, 40123, Italy; Research Centre Technology in Care, Zuyd University of Applied Sciences, Heerlen, Netherlands; CAPHRI School for Public Health and Primary Care, Department of Health Services Research, Maastricht University, Maastricht, Netherlands	Desideri, L., Centre for Assistive Technology-Az. USL Bologna-Ausilioteca, AIAS Bologna Onlus, Via Sant'Isaia 90, Bologna, 40123, Italy; Bizzarri, M., Centre for Assistive Technology-Az. USL Bologna-Ausilioteca, AIAS Bologna Onlus, Via Sant'Isaia 90, Bologna, 40123, Italy; Bitelli, C., Centre for Assistive Technology-Az. USL Bologna-Ausilioteca, AIAS Bologna Onlus, Via Sant'Isaia 90, Bologna, 401…	There is a lack of evidence on the effects and quality of assistive technology service delivery (ATSD). This study presents a quasi-experimental 3-months follow-up using a pre-test/post-test design aimed at evaluating outcomes of assistive technology (AT) interventions targeting children with physical and multiple disabilities. A secondary aim was to evaluate the feasibility of the follow-up asse…	Developmental disability; Knowledge translation; Multiple disabilities; Outcomes; Service delivery	Cost benefit analysis; Costs; Human computer interaction; Quality control; Developmental disability; Knowledge translation; Multiple disabilities; Outcomes; Service delivery; Economic and social effects; adolescent; child; disabled person; female; human; male; outcome assessment; patient satisfaction; preschool child; procedures; psychology; questionnaire; rehabilitation; self help device; standa…	Article	Scopus
Fukuda H., Morishita T., Ogata T., Saita K., Hyakutake K., Watanabe J., Shiota E., Inoue T.	Tailor-made rehabilitation approach using multiple types of hybrid assistive limb robots for acute stroke patients: A pilot study	2016	Assistive Technology	19	https://www.scopus.com/inward/record.uri?eid=2-s2.0-84962178599&doi=10.1080%2f10400435.2015.1080768&partnerID=40&md5=0661f8af1d4e0e49836d9316d2c6859a	Department of Neurosurgery, Fukuoka University, Nanakuma 7-45-1, Jonan ward, Fukuoka, Japan; Department of Rehabilitation Medicine, Fukuoka University Hospital, Fukuoka, Japan; Department of Neurology, Fukuoka University, Fukuoka, Japan	Fukuda, H., Department of Neurosurgery, Fukuoka University, Nanakuma 7-45-1, Jonan ward, Fukuoka, Japan, Department of Rehabilitation Medicine, Fukuoka University Hospital, Fukuoka, Japan; Morishita, T., Department of Neurosurgery, Fukuoka University, Nanakuma 7-45-1, Jonan ward, Fukuoka, Japan; Ogata, T., Department of Neurosurgery, Fukuoka University, Nanakuma 7-45-1, Jonan ward, Fukuoka, Japan…	This article investigated the feasibility of a tailor-made neurorehabilitation approach using multiple types of hybrid assistive limb (HAL) robots for acute stroke patients. We investigated the clinical outcomes of patients who underwent rehabilitation using the HAL robots. The Brunnstrom stage, Barthel index (BI), and functional independence measure (FIM) were evaluated at baseline and when pati…	Hybrid assistive limb; Neurorehabilitation; Physical impairment; Robot; Stroke rehabilitation	Exoskeleton (Robotics); Industrial robots; Neuromuscular rehabilitation; Robots; Stages; Clinical outcome; Exoskeleton robots; Functional independence measures; Hemorrhagic stroke; Hybrid assistive limbs; Neurorehabilitation; Physical impairments; Stroke rehabilitation; Patient rehabilitation; aged; devices; feasibility study; female; human; limb prosthesis; male; middle aged; pilot study; proced…	Article	Scopus
Johansen D., Sebelius F., Jensen S., Bentsen B., Popović D.B., Andreasen Struijk L.N.S.	A comparative study of virtual hand prosthesis control using an inductive tongue control system	2016	Assistive Technology		https://www.scopus.com/inward/record.uri?eid=2-s2.0-84962173323&doi=10.1080%2f10400435.2015.1070303&partnerID=40&md5=71d2aa90f12a527001971b8f713fd716	Centre for Sensory-Motor Interaction, Department of Health Science and Technology, Aalborg University, Fredrik Bajers Vej 7, Aalborg, DK-9220, Denmark; Department of Biomedical Engineering, Lund University, Lund, Sweden; Arm Center, Sahva A/S, København Ø, Denmark; School of Electrical Engineering, University of Belgrade, Belgrade, Serbia	Johansen, D., Centre for Sensory-Motor Interaction, Department of Health Science and Technology, Aalborg University, Fredrik Bajers Vej 7, Aalborg, DK-9220, Denmark; Sebelius, F., Department of Biomedical Engineering, Lund University, Lund, Sweden; Jensen, S., Arm Center, Sahva A/S, København Ø, Denmark; Bentsen, B., Centre for Sensory-Motor Interaction, Department of Health Science and Technolog…	This study compares the time required to activate a grasp or function of a hand prosthesis when using an electromyogram (EMG) based control scheme and when using a control scheme combining EMG and control signals from an inductive tongue control system (ITCS). Using a cross-over study design, 10 able-bodied subjects used a computer model of a hand and completed simulated grasping exercises. The t…	Myoelectric control; Prosthesis control schemes; Upper limb prosthetics	Control systems; End effectors; Muscle; Myoelectrically controlled prosthetics; Activation time; Comparative studies; Computer modeling; Control schemes; Myoelectric control; Prosthesis control; Statistical significance; Upper limb prosthetics; Prosthetics; adult; comparative study; crossover procedure; devices; electromyography; female; hand; hand strength; human; limb prosthesis; male; physiolo…	Article	Scopus
Salatino C., Andrich R., Converti R.M., Saruggia M.	An observational study of powered wheelchair provision in Italy	2016	Assistive Technology	9	https://www.scopus.com/inward/record.uri?eid=2-s2.0-84962164921&doi=10.1080%2f10400435.2015.1074631&partnerID=40&md5=9d08daf420bdf2d2eac6d4055fde2c31	Centro per LInnovazione e Il Trasferimento Tecnologico, IRCCS Fondazione Don Carlo Gnocchi, Via Capecelatro 66, Milano, 20148, Italy; Servizio DAT (Domotica, Ausili, Terapia Occupazionale), IRCCS Fondazione Don Carlo Gnocchi, Milano, Italy	Salatino, C., Centro per LInnovazione e Il Trasferimento Tecnologico, IRCCS Fondazione Don Carlo Gnocchi, Via Capecelatro 66, Milano, 20148, Italy; Andrich, R., Centro per LInnovazione e Il Trasferimento Tecnologico, IRCCS Fondazione Don Carlo Gnocchi, Via Capecelatro 66, Milano, 20148, Italy; Converti, R.M., Servizio DAT (Domotica, Ausili, Terapia Occupazionale), IRCCS Fondazione Don Carlo Gnocc…	Powered wheelchairs are complex and expensive assistive devices that must be selected and configured on the basis of individual user needs, lifestyle, motivation, driving ability, and environment. Providing agencies often require evidence that their financial investment will lead to a successful outcome. The authors surveyed a sample of 79 users who had obtained powered wheelchairs from a Regiona…	Assistive technology; Cost-effectiveness; Follow-up; Outcome assessment; Powered wheelchairs	Cost benefit analysis; Cost effectiveness; Costs; Human computer interaction; Wheelchairs; Assistive technology; Corrective actions; Driving abilities; Financial investments; Follow up; Observational study; Outcome assessment; Powered wheel chairs; Surveys; adult; aged; cost benefit analysis; disabled person; female; follow up; human; Italy; male; middle aged; outcome assessment; patient satisfac…	Article	Scopus
Dicianno B.E., Morgan A., Lieberman J., Rosen L.	Rehabilitation Engineering & Assistive Technology Society (RESNA) position on the application of wheelchair standing devices: 2013 current state of the literature	2016	Assistive Technology	3	https://www.scopus.com/inward/record.uri?eid=2-s2.0-84962163796&doi=10.1080%2f10400435.2015.1113837&partnerID=40&md5=435527f87b69360552ae788a05153b02	Human Engineering Research Laboratories, VA Pittsburgh Healthcare System, 6425 Penn Avenue, Suite 400, Bakery Square, Pittsburgh, PA 15206, United States; Department of PMandR, University of Pittsburgh School of Medicine, Pittsburgh, PA, United States; Permobil Inc., Lebanon, TN, United States; Department of Rehabilitation, Mount Sinai Hospital, New York, NY, United States; Motion Analysis Center…	Dicianno, B.E., Human Engineering Research Laboratories, VA Pittsburgh Healthcare System, 6425 Penn Avenue, Suite 400, Bakery Square, Pittsburgh, PA 15206, United States, Department of PMandR, University of Pittsburgh School of Medicine, Pittsburgh, PA, United States; Morgan, A., Permobil Inc., Lebanon, TN, United States; Lieberman, J., Department of Rehabilitation, Mount Sinai Hospital, New York…	This article, approved by the Rehabilitation Engineering & Assistive Technology Society of North America Board of Directors on December 23, 2013, shares typical clinical applications and provides evidence from the literature supporting the use of wheelchair standers. © 2016 RESNA.	Mobility limitation; Rehabilitation; Standing position; Wheelchairs	Human rehabilitation engineering; Patient rehabilitation; Assistive technology; Board of directors; Clinical application; Rehabilitation engineering; Standing position; Wheelchairs; biomedical engineering; body position; equipment design; human; organization and management; physiology; rehabilitation; self help device; standards; walking difficulty; wheelchair; Biomedical Engineering; Equipment D…	Review	Scopus
Rosenbloom R., Mason R.A., Wills H.P., Mason B.A.	Technology delivered self-monitoring application to promote successful inclusion of an elementary student with autism	2016	Assistive Technology	12	https://www.scopus.com/inward/record.uri?eid=2-s2.0-84962135801&doi=10.1080%2f10400435.2015.1059384&partnerID=40&md5=44d6e6e7576fa66ad5761fc4a15e22d4	Juniper Gardens Childrens Project, University of Kansas, 444 Minnesota Avenue, Kansas City, KS 66101, United States	Rosenbloom, R., Juniper Gardens Childrens Project, University of Kansas, 444 Minnesota Avenue, Kansas City, KS 66101, United States; Mason, R.A., Juniper Gardens Childrens Project, University of Kansas, 444 Minnesota Avenue, Kansas City, KS 66101, United States; Wills, H.P., Juniper Gardens Childrens Project, University of Kansas, 444 Minnesota Avenue, Kansas City, KS 66101, United States; Mason,…	The ever-increasing prevalence of children diagnosed with autism spectrum disorder (ASD) is paralleled in public educational settings, including general education classrooms. Challenges with social/behavioral functioning, including limited self-management and behavior inhibition, can lead to off-task and disruptive behaviors that interfere with acquisition of academic and social skills. Without e…	Autism spectrum disorder; Classroom; Self-monitoring intervention	Diseases; Education; Autism spectrum disorders; Classroom; Educational settings; Elementary students; Functional relationship; General education; Self-monitoring; Tracking materials; Students; autism; child; education; human; male; mobile application; personal digital assistant; procedures; school; student; Autism Spectrum Disorder; Child; Computers, Handheld; Education; Humans; Male; Mobile Appl…	Article	Scopus
Gershon P., Klatzky R.L., Palani H., Giudice N.A.	Visual, tangible, and touch-screen: Comparison of platforms for displaying simple graphics	2016	Assistive Technology	9	https://www.scopus.com/inward/record.uri?eid=2-s2.0-84962132664&doi=10.1080%2f10400435.2015.1054566&partnerID=40&md5=7d8c789418698012133f559b5a800a42	Department of Psychology, Carnegie Mellon University, 5000 Forbes Ave., Pittsburgh, PA 15213, United States; Spatial Informatics Program, School of Computing and Information Science, University of Maine, Orono, ME, United States	Gershon, P., Department of Psychology, Carnegie Mellon University, 5000 Forbes Ave., Pittsburgh, PA 15213, United States; Klatzky, R.L., Department of Psychology, Carnegie Mellon University, 5000 Forbes Ave., Pittsburgh, PA 15213, United States; Palani, H., Spatial Informatics Program, School of Computing and Information Science, University of Maine, Orono, ME, United States; Giudice, N.A., Spati…	Four different platforms were compared in a task of exploring an angular stimulus and reporting its value. The angle was explored visually, tangibly as raised fine-grit sandpaper, or on a touch-screen with a frictional or vibratory signal. All platforms produced highly accurate angle judgments. Differences were found, however, in exploration time, with vision fastest as expected, followed by tang…	Haptic I/O; Human information processing; Information search and retrieval; Performance evaluation	Bionics; Friction; Graphical displays; Haptic I/O; Human information processing; Information search and retrieval; Performance evaluation; Rapidly advancing technology; Tangible display; Vibratory signals; Touch screens; decision making; friction; noise; stimulus; touch; vibration; vision; adult; analysis of variance; computer graphics; computer interface; female; human; male; self help device; y…	Article	Scopus
[truncated: 508 more rows]
